# Supplementary material for: Phylogenomics and Molecular Signatures for Species from the Plant Pathogen-Containing Order Xanthomonadales
Source: PubMed Central journal article supplement (PMC3568101; doi:10.1371/journal.pone.0055216), 2013-02-08
Supplement: pone.0055216.s002.pdf [file pone.0055216.s002.pdf]

|                                  |                                       | 164                              |                               | 213                           |                   |
|----------------------------------|---------------------------------------|----------------------------------|-------------------------------|-------------------------------|-------------------|
| Xanthomonadales                  | <i>Xylella fastidiosa</i> Dixon       | 71275790                         | FTIFVMGINAGSLISPLITSWLAGQVFGT | PMQQNYK VVFIASGIGMFLSL        |                   |
|                                  | <i>Xanthomonas fuscans</i>            | 294667688                        | -----L-AM---VL-QL--EK----     | EVMPs-- M--M---V--LI--        |                   |
|                                  | <i>Xanthomonas campestris</i>         | 78046035                         | -----L-AM---VL-QL--EK----     | EVMPs-- M--M---V--LI--        |                   |
|                                  | <i>Xanthomonas perforans</i>          | 325927726                        | -----L-AM---VL-QL--EK----     | EVMPs-- M--M---V--LI--        |                   |
|                                  | <i>Xanthomonas axonopodis</i>         | 21241222                         | -----L-AM---VL-QL--EK----     | DVMPs-- M--M---V--LI--        |                   |
|                                  | <i>Xanthomonas gardneri</i>           | 325919443                        | -----L-AM---VL-QL--EK----     | QAMPS-- M--M---V--LI--        |                   |
|                                  | <i>Xanthomonas oryzae</i>             | 58583697                         | -----GFVA-IL-GL--DKL----      | EAMPA-- Y-----LI--            |                   |
|                                  | <i>Xanthomonas albilineans</i>        | 285019501                        | -----GFFA-IL-GL--DKL----      | EAMPA-- Y-----LI--            |                   |
|                                  | <i>Xanthomonas vesicatoria</i>        | 325915181                        | -----L-AM---VL-QL--EK----     | QAMPA-- M--M---A--LI--        |                   |
|                                  | <i>Stenotrophomonas maltophilia</i>   | 194367516                        | -----I-AM-A-VL-EY--RK----     | SEMPs-- -----V--LI--          |                   |
|                                  | <i>Stenotrophomonas</i> sp. SKA14     | 254520981                        | -----I-AM-A-VL-EY--RK----     | SEMPs-- -----V--LI--          |                   |
|                                  | <i>Rhodanobacter</i> sp. 2APBS1       | 352079924                        | --L-----A--A-IL--I--NK----    | --GHH--H-----A--V--LI--       |                   |
|                                  | <i>Grimontia hollisae</i>             | 262275906                        | -----L---LAGI-AGTVMHYGWK      | AG-LSA---L---                 |                   |
|                                  | <i>Teredinibacter turnerae</i>        | 254786138                        | Y--Y-----I--FFAT-LCG--GETFGWS | YG-G-A-V--L-G-                |                   |
|                                  | <i>Pseudoalteromonas tunicata</i>     | 88857793                         | --L-----AFLA---CAY-GETYGWK    | YG-GLA---LAG-                 |                   |
|                                  | Other<br>γ-Proteobacteria             | <i>Vibrionales bacterium</i>     | 148980745                     | -----L-A-LGG--SGAA-ESYGWK     | AG-L-A---VI--     |
|                                  |                                       | <i>Aeromonas hydrophila</i>      | 117618661                     | -----L---LAGV-CGAA-TAYGWQ     | AA-V-A-V--LV--    |
| <i>Klebsiella pneumoniae</i>     |                                       | 152971821                        | -SL-----I--F-A---SG--IKSHGWH  | WG-GIG---LVA-                 |                   |
| <i>Vibrio fischeri</i>           |                                       | 197334596                        | -----L---LAGVVSQSVT-VWGWK     | AG-V-A---II--                 |                   |
| <i>Acinetobacter baumannii</i>   |                                       | 301346734                        | -S-----M--F-A---GL--KDHGWH    | LG-GIG---LIA-                 |                   |
| <i>Vibrio alginolyticus</i>      |                                       | 91225921                         | -----L-A-LAGVVSQSVTTSYGWK     | AG-V-A-V--LV--                |                   |
| <i>Colwellia psychrerythraea</i> |                                       | 71282472                         | -----L-AFLA-ITVGI-GE--NWH     | YG--LA-C--LIG-                |                   |
| <i>Acinetobacter baumannii</i>   |                                       | 193077887                        | -S-----M--F-A---GL--KDHGWH    | LG-GIG---LIA-                 |                   |
| <i>Aliivibrio salmonicida</i>    |                                       | 209694404                        | -----L---LAGVVSQSVT-IWGWK     | AG-A-A---II--                 |                   |
| <i>Providencia stuartii</i>      |                                       | 183598535                        | -SL-----M--F-A---IGP-HEKYGWH  | LG-GLG---LIA-                 |                   |
| <i>Vibrio orientalis</i>         |                                       | 261252243                        | -----L-A--AGVASQSVTNSFGWK     | AG-LVA-L--II--                |                   |
| <i>Arsenophonus nasoniae</i>     |                                       | 284007204                        | -SL-----M--F-A---IGP-YEYKYGWH | IG-GLG---LIA-                 |                   |
| <i>Shewanella baltica</i>        |                                       | 126173789                        | ----A---L-ATLA---CAY-GETYGWK  | YG-GLA-L--LAG-                |                   |
| <i>Kangiella koreensis</i>       |                                       | 256821955                        | --L-----L--FL-SITCGIIGIIVGWGA | YG-GLA---L-G-                 |                   |
| <i>Alteromonas</i> sp. SN2       |                                       | 333894220                        | YALY-----I---AY-V-GY-QENWGWD  | YA-G-AA---AIG-                |                   |
| <i>Idiomarina baltica</i>        |                                       | 85711680                         | Y-LY-----I--I-GYFV-GY-QENAGYH | WG-G-AAV--AFG-                |                   |
| α-Proteobacteria                 |                                       | <i>Glaciecola</i> sp. HTCC2999   | 221133332                     | Y-LY-----I-AV-GYTVCGY-QVNMGYH | WA-G-AAV--AIG-    |
|                                  | <i>Salmonella enterica</i>            | 224582899                        | -SLL-AAG-I--IAA-IACGLA-QWYGWH | -G-ALA-V---IG-                |                   |
|                                  | <i>Escherichia coli</i>               | 300947710                        | -SLL-AAG-I--IAA-IACGLA-QWYGWH | -G-ALA-G---IG-                |                   |
|                                  | <i>Novosphingobium nitrogenifigen</i> | 326388414                        | -SL--V---I-ATAA--LCA---DRWGWA | PA-E-TSV--V-G-                |                   |
|                                  | <i>Nitrobacter hamburgensis</i>       | 92119225                         | YS---V---L-AMLA--VAGT-GEEIGWP | YG-G-A---MIG-                 |                   |
|                                  | <i>Sphingomonas</i> sp. S17           | 332185434                        | -S-----GALG-IVCGV-GET-GWA     | YG-G-A-V--L-G-                |                   |
|                                  | <i>Hirschia baltica</i>               | 254293389                        | -----L--F-ASFACGI-GIVYGWK     | YG-GLA---L-G-                 |                   |
|                                  | <i>Hyphomonas neptunium</i>           | 114800217                        | --L-----L--FLATWTCGI-GIVYGWA  | WG-G-A-V--L-G-                |                   |
|                                  | <i>Erythrobacter</i> sp. SD-21        | 149185140                        | Y-----V-AATASI-CGY-GQTYGWQ    | YG-GLA-F--L-G-                |                   |
|                                  | <i>Phenylobacterium zucineum</i>      | 197105272                        | -Q---L-----VIAA---AGT-GEG-GWH | YG-G-A-V--LIA-                |                   |
|                                  | <i>Sphingopyxis alaskensis</i>        | 103486444                        | Y-----L-AFLGS-LCGY-GETYGWA    | YG-G-A-F--L-G-                |                   |
|                                  | <i>Erythrobacter litoralis</i>        | 85375324                         | Y-----L-AA-GS-LCGYGETYGWA     | YG-GLA---L-G-                 |                   |
|                                  | <i>Zymomonas mobilis</i>              | 56551897                         | -----L-GALG---CGYVGEKYGWR     | YG-GMA-V--AIG-                |                   |
|                                  | <i>Parvularcula bermudensis</i>       | 304321342                        | --L--V---L-AFLGAIWAGY-GEVHGWK | YG-GLA-V--L-G-                |                   |
|                                  | <i>Citromicrobium bathyomarinum</i>   | 296282079                        | Y----I---L-AAAGTI-AGY-GETIGWA | YG-G-A---L-G-                 |                   |
|                                  | β-Proteobacteria                      | <i>Chromobacterium violaceum</i> | 34496617                      | -----T----A--VCGT-GDTGNPA     | DF-WG-M-A-F--L--- |
|                                  |                                       | <i>Laribacter hongkongensis</i>  | 226941725                     | Y-----L--FLA---CGY-GDTGNPA    | DFRWG-LTA-V--L--V |
| <i>Methylphilales bacterium</i>  |                                       | 118594916                        | YSF--V---M-AF-A--LIGYVGEIDWH  | YG-VLAAV---MG-                |                   |

Figure S2

Partial sequence alignment of a conserved region in the amino acid/peptide transporter showing a 7 aa insert that is specific for all Xanthomonadales.
