# Supplementary material for: Phylogenomics and Molecular Signatures for Species from the Plant Pathogen-Containing Order Xanthomonadales
Source: PubMed Central journal article supplement (PMC3568101; doi:10.1371/journal.pone.0055216), 2013-02-08
Supplement: pone.0055216.s003.pdf [file pone.0055216.s003.pdf]

|                                    |                                     | 40                      |                         | 85                        |
|------------------------------------|-------------------------------------|-------------------------|-------------------------|---------------------------|
| Xanthomonadales                    | <i>Xanthomonas fuscans</i>          | 294667079               | IIMPPIGWAIIGNVDFSRLAWLK | PAGVD ATGKEIPAVAIGYGDFIN  |
|                                    | <i>Xanthomonas axonopodis</i>       | 21244033                | -----                   | -----                     |
|                                    | <i>Xanthomonas vesicatoria</i>      | 325916668               | -----                   | -----                     |
|                                    | <i>Xanthomonas gardneri</i>         | 325919139               | -----                   | -----                     |
|                                    | <i>Xanthomonas oryzae</i>           | 58583004                | -----                   | -----D-----               |
|                                    | <i>Xanthomonas perforans</i>        | 325928477               | -----                   | -----                     |
|                                    | <i>Xanthomonas campestris</i>       | 289665119               | -----                   | -----S-----               |
|                                    | <i>Xanthomonas albilineans</i>      | 285019030               | -----LLV-GM---HW-LT--   | A-T-- -A--PVQ--V--I---L-  |
|                                    | <i>Stenotrophomonas sp. SKA14</i>   | 254525001               | -----L-LL--K---Q---T-S  | --SIG -D-----V-----       |
|                                    | <i>Stenotrophomonas maltophilia</i> | 194366968               | -----L-ML--K---Q---T-S  | --SIG -D-----V-----       |
|                                    | <i>Xylella fastidiosa</i>           | 15836644                | --S-L--VMV-GI---K-SLT-- | A-T-- -A--V---V-----L-    |
|                                    | <i>Rhodanobacter sp. 2APBS1</i>     | 352090462               | -----LT-GI---AMK----    | --GDDS DPKHK-AE---Q--A--- |
|                                    | <i>Pseudoxanthomonas suwonensis</i> | 319786092               | -----L--L-----D---T-S   | --R-A -D-S-----V-----E-L- |
|                                    | <i>Pseudoxanthomonas spadix</i>     | 357416396               | L-----MLV-----IT--      | E-S-- -A--V---VVA--S---   |
|                                    | <i>Actinobacillus minor</i>         | 257465685               | VV-----L--G---KD--IEIA  | PAKEGAE--MLK--A--Q        |
|                                    | <i>Aeromonas hydrophila</i>         | 117621104               | V-----LIL-G---D--VT--   | -AEGST---V-A--K--Q        |
|                                    | <i>Aeromonas salmonicida</i>        | 145298068               | V-----LIL-G---D--VT--   | -AEGAT---V-A--K--Q        |
| <i>Azotobacter vinelandii</i>      | 226946144                           | V---L-LL--G---D--IT--   | QAQGD---VLA--R--Q       |                           |
| <i>Candidatus Hamiltonella</i>     | 238897728                           | -----LL--G--LKQFSF--R   | EARNDV---IMN--S-L       |                           |
| <i>Citrobacter koseri</i>          | 157148865                           | -----L-LL--GI--KQF-FT-R | EAQGD---VMH--V--Q       |                           |
| <i>Cronobacter turicensis</i>      | 260599610                           | -----L-LL--GI--KQF-LT-R | PAVGDT---IMH--V--Q      |                           |
| <i>Dickeya dadantii</i>            | 307132810                           | -----L-LL--G---KQFH--R  | EAQGN--A--S-N--V--Q     |                           |
| <i>Dickeya zeae</i>                | 251788000                           | -----L-LL--G---KQFH--R  | EAQGNLA--S-N--T--Q      |                           |
| <i>Edwardsiella tarda</i>          | 294638025                           | V---VL-LL--G---KQFH--R  | EAANGA---VVN--Q--Q      |                           |
| <i>Enterobacter cloacae</i>        | 296104998                           | -----L-LL--GI--KQF-FT-R | EAQGD---VMH--V--Q       |                           |
| <i>Erwinia tasmaniensis</i>        | 188535247                           | -----L-LL--G---KQFS-I-- | PADGAA---VME--V-LQ      |                           |
| <i>Escherichia albertii</i>        | 170769538                           | -----L-LL--GI--KQF-VT-R | DAQGDV---VMH--V--Q      |                           |
| <i>Escherichia coli</i>            | 15803818                            | -----L-LL--GI--KQF-VT-R | DAQGD---VMH--V--Q       |                           |
| <i>Haemophilus ducreyi</i>         | 33152991                            | V-----L--G---KD--IQIA   | PAKEGAE--MLK--A--Q      |                           |
| <i>Mannheimia haemolytica</i>      | 261493883                           | VV-----L--G---KD--IEIA  | PAKEGAE--MLK--A--Q      |                           |
| <i>Pantoea ananatis</i>            | 291619146                           | -----L-LL--G---KSFS---  | PAVGNA---VME--V-LQ      |                           |
| <i>Pasteurella multocida</i>       | 15603429                            | VV--VL-ILT-G---KD-SI--- | EAAG-V---TLN--A--Q      |                           |
| <i>Pectobacterium atrosepticum</i> | 50122923                            | -----L-LL--G---KQ-SLI-R | DAQG-----VMN--A--Q      |                           |
| <i>Proteus mirabilis</i>           | 197287097                           | V---L-LL--GI--KQFSL--R  | EAHGD---ILN--A--Q       |                           |
| <i>Providencia alcalifaciens</i>   | 212709008                           | V---L-LI--G---KQFSL--R  | EAQGD---VMN--M--Q       |                           |
| <i>Pseudomonas syringae</i>        | 28871773                            | V---L-LL--G---D--VT-R   | PAQGT---LLA--K--Q       |                           |
| <i>Salmonella enterica</i>         | 8650506                             | -----L-LL--GI--KQF-VT-R | DAQGD---VMH--V--Q       |                           |
| <i>Serratia odorifera</i>          | 270264344                           | -----L-LL--G---KQFHL--R | EAQGAV---VMN--S--Q      |                           |
| <i>Shewanella sp. W3-18-1</i>      | 120597433                           | V-----IIL-G-N--D-SI--Q  | -AQGDA-S-V-A--K--Q      |                           |
| <i>Shigella sonnei</i>             | 74313809                            | -----L-LL--GI--KQF-VT-R | DAQGD---VMH--V--Q       |                           |
| <i>Sodalis glossinidius</i>        | 85060228                            | V---QL-LL--GI--KQFS---  | PAQGD---VMK--I-LQ       |                           |
| <i>Vibrio cholerae</i>             | 153830945                           | -----IIL-G-N--D-SF--L   | -AQGDA---V-A--K--Q      |                           |
| <i>Yersinia pestis</i>             | 22127889                            | -----L-LLL-G---KQFHF--R | -AEGT---VMN--T--Q       |                           |

**Figure S3**

Partial sequence alignment of Large-conductance mechanosensitive channel protein showing the presence of a 5 aa insert that is commonly shared by Xanthomonadales.
