# Supplementary material for: Phylogenomics and Molecular Signatures for Species from the Plant Pathogen-Containing Order Xanthomonadales
Source: PubMed Central journal article supplement (PMC3568101; doi:10.1371/journal.pone.0055216), 2013-02-08
Supplement: pone.0055216.s004.pdf [file pone.0055216.s004.pdf]

|                           |                              |                      |                       |                             |                              |
|---------------------------|------------------------------|----------------------|-----------------------|-----------------------------|------------------------------|
|                           | Stenotrophomonas maltophilia | 194365604            | PNDFRRDFAGRLQEEFADA   | EQW                         | TAEALEGNRQVKMAGRLMAKRIMGKASF |
|                           | Stenotrophomonas sp. SKA14   | 254524293            | -----Q-----           | G-                          | -----                        |
|                           | Xylella fastidiosa           | 15837714             | ---VK--HY-ADV-VA--NV  | -T-                         | -----AS-DR-R-----L-----      |
|                           | Xanthomonas oryzae           | 58582495             | ----V--H--D--A-----   | DT-                         | -PD--AS--T-----V-----        |
|                           | Xanthomonas axonopodis       | 21242620             | ----V--H--D--A-----   | DT-                         | -P---AS--T-R-----V-----      |
|                           | Xanthomonas fuscans          | 294624918            | ----V--H--D--A-----   | DT-                         | -P---AS--T-R-----V-----      |
| Xanthomonadales           | Xanthomonas campestris       | 188991535            | ----V-TH--D--A---E-   | -T-                         | -----AAD-S--L-----V-----     |
|                           | Xanthomonas albilineans      | 285018128            | -----S----DV-A---L    | -R-                         | --D--AQ--SLRL---L--V-----    |
|                           | Xanthomonas perforans        | 325925183            | ----V--H--D--A-----   | DT-                         | -P---AS--T-R-----V-----      |
|                           | Xanthomonas vesicatoria      | 325916712            | ----V--H--D--A-----   | DT-                         | -P---AS--T-----V-----        |
|                           | Xanthomonas gardneri         | 325922146            | ----V--Q--D--A-----   | -T-                         | -P---AS--T-R-----V-----      |
|                           | Pseudoxanthomonas suwonensis | 319787301            | ----K-A-Y--D--A-----  | G-                          | -G---ALP-T-AI-----V-----     |
|                           | Pseudoxanthomonas spadix     | 357417570            | ----HAL--D--A-----    | DTF                         | --GV---LD---RL-----V-----    |
|                           | Rhodanobacter sp. 2APBS1     | 352081997            | ----KVDS--D--T---K    | DVH                         | ----V-AAV-R-----IVL--VQ--V-- |
|                           | Actinobacillus minor         | 240949401            | --K--DAY-KD-HAKYD-V   |                             | DG--KEQDI---V---I-L-V-----   |
|                           | Aeromonas hydrophila         | 117617708            | -----DSLSD-HA--G-K    |                             | S-DE-AAL-KR--I---I-TR-----   |
| Arsenophonus nasoniae     | 284008433                    | -----YLSSD-HGKY--Q   |                       | E--Q-IDLDDID-SV---MITR----- |                              |
| Candidatus Regiella       | 304414310                    | -----DTLSHE-H-QYDNK  |                       | DNDD-SKLDIK--V---M-TR-----  |                              |
| Citrobacter freundii      | 30961858                     | -----DHTSDQ-HAD-DAK  |                       | EN-E--ALNIE-SV---M-TR-----  |                              |
| Cronobacter sakazakii     | 156932659                    | -----DHTSDQ-HAD-DGK  |                       | EN-E--ALNIE-CV---M-TR-----  |                              |
| Dickeya dadantii          | 307129434                    | -----DSISD--HASYDEK  |                       | DN-E--AL-LE-NV---M-TR-----  |                              |
| Edwardsiella ictaluri     | 238921195                    | -----DTTSDK-HSLYDGK  |                       | SK-E--ALNVE-SV---M-TR-----  |                              |
| Enterobacter cancerogenus | 261342292                    | -----DHTSDQ-HAD-DAK  |                       | EN-E--ALNVE-AV---M-TR-----  |                              |
| Erwinia amylovora         | 292487147                    | -----DRTSDQ-HAA-DGK  |                       | EN-E-VEL-IE-SV---M-TR-----  |                              |
| Escherichia albertii      | 170766125                    | -----DHTSDQ-HA--DGK  |                       | EN-E--ALNIE-AV---M-TR-----  |                              |
| Escherichia coli          | 146689                       | -----DHTSDQ-H--DAK   |                       | DNQE--SLNIE-SV---M-TR-----  |                              |
| Haemophilus ducreyi       | 33152397                     | --R---DAY-YA--A-Y-EM |                       | AGD--KDADV---VV--I-L-V----- |                              |
| Halorhodospira halophila  | 121996858                    | -----DAL-AD-H-RYGPL  |                       | DS---QE-AR-TVG--M---V-----  |                              |
| Other                     | Idiomarina baltica           | 85712972             | -----DSL-KD-HA-YDE-   |                             | DK-S--QQ-VR--V---M-TR-----   |
|                           | Mannheimia haemolytica       | 254360791            | -T---DAL-KD-HAQYDAV   |                             | EG-T-KEQNI---V---I-L-V-----  |
|                           | Nitrosococcus halophilus     | 292492473            | --N---NVM--E--A-YHHR  |                             | S--E--KRPLR--V---M-TR-----   |
|                           | Pantoea ananatis             | 291618680            | -----DTTSD--HASYDEK   |                             | SN-E--DL-IE-SV---M-TR-----   |
|                           | Pectobacterium atrosepticum  | 50119719             | -----DSISDH-HA--DAK   |                             | EN-E--EL-IE-TV---M-TR-----   |
|                           | Photobacterium symbiotica    | 253988707            | -----H--NMSEE-HAKYD-K |                             | -Q-E--ALNIE-TVG--M-TR-----   |
|                           | Proteus mirabilis            | 197285859            | -----DAMSDE-HQYDAM    |                             | S--E-DAANVE-AI---M-TR-----   |
|                           | Providencia alcalifaciens    | 212710039            | -----NVSDK-HA--GEK    |                             | ---E--DLNVE-TI--M-TR-----    |
|                           | Psychromonas sp. CNPT3       | 90409171             | -----KNISDE-H-KYD-K   |                             | -K-E-DELAVD-SI---M-TR-----   |
|                           | Salmonella enterica          | 161506412            | -----DRTSDQ-HA--DAK   |                             | E--E--ALNIE-SV---M-TR-----   |
| $\gamma$ -Proteobacteria  | Serratia proteamaculans      | 157372123            | -----DTTSDK-HAAYG-K   |                             | DN-E--AL-VE-TV---M-TR-----   |
|                           | Shigella boydii              | 82545487             | -----DHTSDQ-HA--DGK   |                             | EN-E--ALNIE-AV---M-TR-----   |
|                           | Sodalis glossinidius         | 85059967             | -----DAVSDQ-HARYGEK   |                             | SN-E--ALNIE-SI---M-TR-----   |
|                           | Tolomonas auensis            | 237807750            | -----DQISNE-HAA-D-K   |                             | SQDE-AAEKHY--I---I-TR-----   |
|                           | Xenorhabdus bovienii         | 290476398            | -----NISSED-HAKYD-K   |                             | -Q-E--ALNIE-TV---M-TR-----   |
|                           | Yersinia pestis              | 167470510            | -----NLSAQ-HA--DSK    |                             | EN-E--ALNID-TV---M-TR-----   |
|                           | Thiobacillus denitrificans   | 74316911             | ----E-R-Y----AH-HG-K  |                             | SK----AEAVD-QL---M-L-V-----  |
|                           | Burkholderia ubonensis       | 167586750            | ----QPTHH-AD--AK---S  |                             | DKA---A-PVE-AV---M-L-V-----  |
|                           | Pusillimonas sp. T7-7        | 332284054            | ----QPDNV-AA-HAAYDEL  |                             | DKD--AEV-K---V---M-L-V-----  |
|                           | Nitrosospora multiformis     | 82703393             | ----P--H-SAD-HNTYSEH  |                             | ST-T--AEPVP-RV---MWL--V----- |
| $\beta$ -Proteobacteria   | Cupriavidus metallidurans    | 94309979             | ----QPTHQ--A-HAQYGET  |                             | DQAT--ASPVE-SI---M-L-V-----  |

Figure S4

Partial sequence alignment of Lysyl-tRNA synthetase showing a 3 aa insert that is uniquely shared by all members of Xanthomonadales.
