# Supplementary material for: Phylogenomics and Molecular Signatures for Species from the Plant Pathogen-Containing Order Xanthomonadales
Source: PubMed Central journal article supplement (PMC3568101; doi:10.1371/journal.pone.0055216), 2013-02-08
Supplement: pone.0055216.s005.pdf [file pone.0055216.s005.pdf]

|                                   |                                     | DGGAQHFVDCISAIRTSSPNTRIEILTPDFR  | GK                               | GRMDRALDILALSPDPVFNHN             |                      |
|-----------------------------------|-------------------------------------|----------------------------------|----------------------------------|-----------------------------------|----------------------|
| Xanthomonadales                   | <i>Xanthomonas oryzae</i>           | 58583575                         | -----                            | -----E-----                       |                      |
|                                   | <i>Xanthomonas axonopodis</i>       | 21241439                         | -----A-----                      | -----E-----                       |                      |
|                                   | <i>Xanthomonas campestris</i>       | 78046285                         | -----A-----                      | -----E-----                       |                      |
|                                   | <i>Xanthomonas albilineans</i>      | 285017612                        | -----A--A--VAA-A-----            | -----E--E--TH-----                |                      |
|                                   | <i>Xanthomonas vesicatoria</i>      | 325915038                        | -----A--A-----                   | -----E-----                       |                      |
|                                   | <i>Xanthomonas gardneri</i>         | 325920078                        | -----V--K-----                   | -----E-----                       |                      |
|                                   | <i>Pseudoxanthomonas spadix</i>     | 357418483                        | -----A-----SH--G--V-----         | -----E--T-----                    |                      |
|                                   | <i>Pseudoxanthomonas suwonensis</i> | 319785906                        | -----A--ERA-G-----               | -----E--G--QN-----                |                      |
|                                   | <i>Rhodanobacter</i> sp. 2APBS1     | 352079802                        | ---E-AA--R-T-HA---I-----         | ---E--EV-KEF-----                 |                      |
|                                   | <i>Xylella fastidiosa</i>           | 71274929                         | -----A--Q-A-Q-----               | -----AC-----                      |                      |
|                                   | <i>Stenotrophomonas</i> sp. SKA14   | 254521222                        | -----EK-G--V-----                | ---E--E--QN-----                  |                      |
|                                   | <i>Stenotrophomonas maltophilia</i> | 194367214                        | -----EK-G--V-----                | ---E--E--QN-----                  |                      |
|                                   | <i>Acinetobacter lwoffii</i>        | 262376030                        | -----KEA-AL---LL--V-----         | ---I--R-MTEC-----                 |                      |
|                                   | <i>Acinetobacter radioresistens</i> | 255320490                        | -----QE-KCC-----V-----           | ---L-L--S--SQ-----                |                      |
|                                   | <i>Acinetobacter</i> sp. ADP1       | 50084218                         | -----K--ATN-H-L---V-----         | ---LEI--K--S-----                 |                      |
|                                   | <i>Aeromonas hydrophila</i>         | 117620976                        | -----A--KQ--EH--Q-----           | ---EQ--EVFRET-----                |                      |
|                                   | <i>Aeromonas salmonicida</i>        | 145298084                        | -----A--KQ--EH--Q-----           | ---EQ--EVFRET-----                |                      |
|                                   | <i>Aliivibrio salmonicida</i>       | 209694542                        | -----A--NRE--ELN-EI---T-V-----   | -----AMHSN-----                   |                      |
|                                   | <i>Alteromonas macleodii</i>        | 239996597                        | -----N--EH--T-T--V-V-----        | -----E-FKNGV-----                 |                      |
|                                   | <i>Arsenophonus nasoniae</i>        | 284009244                        | -----A--T--KKN--IK--T-V-----     | -----T--TA-----                   |                      |
| <i>Candidatus Regiella</i>        | 304413537                           | -----A--A--AEN-GIK--T-V-----     | -----VNP-----                    |                                   |                      |
| <i>Citrobacter koseri</i>         | 157146756                           | -----A--T--EK--AIK--T-V-----     | -----E--NAT-----                 |                                   |                      |
| <i>Colwellia psychrerythraea</i>  | 71282264                            | -----Q-A--VKE-GEQA---KV--V-----  | -----E--NQNA--H-----             |                                   |                      |
| <i>Dickeya dadantii</i>           | 307130038                           | -----A-----RK---I---T-V-----     | -----TVT-----                    |                                   |                      |
| <i>Edwardsiella ictaluri</i>      | 238920822                           | -----A--H--AK--QI---T-V-----     | -----E--HDN-----                 |                                   |                      |
| <i>Erwinia amylovora</i>          | 292487598                           | -----A-----EKN-SIK--T-V-----     | -----E--TAT-----                 |                                   |                      |
| <i>Escherichia coli</i>           | 146617                              | -----A--T--EK--QIK--T-V-----     | -----TAT-----                    |                                   |                      |
| <i>Klebsiella pneumoniae</i>      | 152969231                           | -----A-----EKN-SIK--T-V-----     | -----TVT-----                    |                                   |                      |
| <i>Marinomonas</i> sp. MED121     | 87119255                            | -----I--NET-KE---IE--T-V-----    | ---K---E-A-----                  |                                   |                      |
| <i>Methylophaga thiooxidans</i>   | 254491589                           | ---R--IR--DE--QQ--E-N---V-----   | ---V--E--TQ---I-----             |                                   |                      |
| <i>Moritella</i> sp. PE36         | 149909673                           | -----R--RE--LLN-EIK---V---K----- | ---K--E-FKDT-----                |                                   |                      |
| Other<br>$\gamma$ -Proteobacteria | <i>Nitrosococcus halophilus</i>     | 292490711                        | ---A--AR--Q-L--Q--Q-C--V-V-----  | -----EA--VA---I-----              |                      |
|                                   | <i>Pantoea ananatis</i>             | 291616671                        | -----A--T--EK--SIK--T-V-----     | -----E--TAT-----                  |                      |
|                                   | <i>Pectobacterium wasabiae</i>      | 261822399                        | -----A-----RKN-QI---T-V-----     | -----E--TAT-----                  |                      |
|                                   | <i>Photobacterium profundum</i>     | 54310021                         | -----RE--EK--EIH--T-V-----       | -----QGT--N-----                  |                      |
|                                   | <i>Photorhabdus luminescens</i>     | 37525258                         | -----A-----EKN-SIK--T-V-----     | -----E--TAT-----                  |                      |
|                                   | <i>Proteus mirabilis</i>            | 197284320                        | -----A--T--EKN--I---T-V-----     | ---K--E--TDT-----                 |                      |
|                                   | <i>Providencia stuartii</i>         | 183598101                        | -----A-----EK--SIK--T-V-----     | -----E--TET-----                  |                      |
|                                   | <i>Pseudoalteromonas atlantica</i>  | 109897874                        | -----N--EH--T-K--V-V-----        | ---K--E--KNGV-----                |                      |
|                                   | <i>Pseudomonas fluorescens</i>      | 77461184                         | -----A--RE--KL---VQL-T-V--Y----- | ---I--E--T-AE-----                |                      |
|                                   | <i>Salmonella enterica</i>          | 161504193                        | -----A--T--AK--EIK--T-V-----     | -----E--NAT-----                  |                      |
|                                   | <i>Serratia proteamaculans</i>      | 157369438                        | -----A--A--AKN-TIK--T-V-----     | -----E--TET-----                  |                      |
|                                   | <i>Shewanella baltica</i>           | 153001833                        | -----A--RE--KLN-DIK--T-V-----    | ---I-A-----STE-----               |                      |
|                                   | <i>Shigella boydii</i>              | 187731162                        | -----A--T--EK--QIK--T-V-----     | -----TAT-----                     |                      |
|                                   | <i>Sodalis glossinidius</i>         | 85058770                         | -----A-----AKN--I---T-V-----     | -----E--INAA-----                 |                      |
|                                   | <i>Teredinibacter turnerae</i>      | 254784821                        | -----A--RES-AL--ELQV-----        | ---I-----QE-----                  |                      |
|                                   | <i>Tolumonas auensis</i>            | 237809575                        | -----A--RE--LA-----T-----        | ---K---VFRET-----                 |                      |
|                                   | <i>Vibrio orientalis</i>            | 261253679                        | -----A--NRE--ALN--I---T-V-----   | ---V---LMKDN-----                 |                      |
|                                   | <i>Yersinia pestis</i>              | 22125074                         | -----A-----AKN-TIK--T-V-----     | -----TAT-----                     |                      |
|                                   | $\alpha$ -Proteobacteria            | <i>Rickettsia conorii</i>        | 15893068                         | ---S--AE--E--K-----T-----L-----   | ---KEG-AE-I-NAK----- |
|                                   |                                     | <i>Stappia aggregata</i>         | 118589899                        | -----A-V-A--KTA-S-T--V-----L----- | ---K-G--E-VVAAK----- |
| <i>Bartonella rochalimae</i>      |                                     | 319404091                        | -----AKV-Y--QKA-T-T--V-----      | NK-G--E-VVAAK-----                |                      |
| <i>Mesorhizobium</i> sp. BNC1     |                                     | 110633976                        | -----A-V-Q--AAT-Q-T-----L-----   | ---K-G--ELVVAAK-----              |                      |
| <i>Bartonella</i> sp. 1-1C        |                                     | 319407103                        | -----AKV-Y--QKA-T-T--V-----      | NK-G--E-VVAAK-----                |                      |
| <i>Ehrlichia ruminantium</i>      |                                     | 258551496                        | ---G--E--EE--KRDS-VT-----L-----  | NKHD-I-KI-KAF---Y---              |                      |
| <i>Rhizobium etli</i>             |                                     | 190891635                        | ---E--EKV-W---AA--A-T-----L----- | KKPG--ERVVAAK-----                |                      |
| $\beta$ -Proteobacteria           | <i>Simonsiella muelleri</i>         | 294789909                        | -----A--N--ET---K---V-----       | ---L-I--E--KN---M---              |                      |
|                                   | <i>Kingella oralis</i>              | 238022577                        | -----A--NE--KT---K---V-----      | ---L-I--E--KN---M---              |                      |
|                                   | <i>Rubrivivax benzoatilyticus</i>   | 332527501                        | -----T---EA--A---V-V-----        | ---L-K--A--KTA---M---             |                      |
|                                   | <i>Neisseria meningitidis</i>       | 319410466                        | -----A--K--ET---K---V-----       | ---L-I--K--ET---M---              |                      |
|                                   | <i>Cupriavidus metallidurans</i>    | 94309006                         | -----Y-----QT-EL-----V-V-----    | ---L-----QAC---M---               |                      |
|                                   | <i>Burkholderia dolosa</i>          | 254251309                        | ---G--E--REV-AQ--E-----          | ---L---S--NAA---M---              |                      |
| <i>Lutliella nitroferrum</i>      | 224825269                           | -----A-----E--KL--S-Q--V-V-----  | ---L-I-----TQT---M---            |                                   |                      |

Figure S5

Partial sequence alignment of Lipoyl synthase showing a 2 aa insert that is commonly shared by all members of Xanthomonadales.
