# Supplementary material for: Phylogenomics and Molecular Signatures for Species from the Plant Pathogen-Containing Order Xanthomonadales
Source: PubMed Central journal article supplement (PMC3568101; doi:10.1371/journal.pone.0055216), 2013-02-08
Supplement: pone.0055216.s006.pdf [file pone.0055216.s006.pdf]

|                            |                              |                         |                         |                            |                              |
|----------------------------|------------------------------|-------------------------|-------------------------|----------------------------|------------------------------|
|                            | Stenotrophomonas maltophilia | 194365393               | IRNSQYARDMDPIEPGCGCVACT | G                          | GYTRSylRHLDRcNEMLAPMLGTLHLNL |
|                            | Stenotrophomonas sp. SKA14   | 254524329               | -----                   | -                          | -----                        |
| Xanthomonadales            | Xanthomonas albilineans      | 285018698               | ---AK-E--L-----Y--S     | S                          | ---A-----                    |
|                            | Xanthomonas oryzae           | 58582107                | ---AK-E--L-T-----H--S   | S                          | -----                        |
|                            | Xanthomonas fuscans          | 294624101               | ---AK-E--L-T-----H--S   | S                          | ---A-----                    |
|                            | Xanthomonas axonopodis       | 21243246                | ---AK-E--L-T-----H--S   | S                          | ---A-----                    |
|                            | Xanthomonas perforans        | 325927083               | ---AK-E--L-T-----H--S   | S                          | ---A-----                    |
|                            | Xanthomonas campestris       | 21231815                | ---AK-E--L-T-----H--S   | S                          | ---A-----                    |
|                            | Xanthomonas gardneri         | 325919631               | ---AK-E--L-T-----H--S   | S                          | -----                        |
|                            | Xanthomonas vesicatoria      | 325915106               | ---AK-E--L-T-----H--S   | S                          | -----                        |
|                            | Pseudoxanthomonas spadix     | 357416954               | ---AR-EK-L-----H--R     | N                          | -F-----                      |
|                            | Xylella fastidiosa           | 28198110                | ---AC---V---Q---P--V    | -                          | ---A-----S--S---             |
|                            | Rhodanobacter sp. 2APBS1     | 352086362               | ---AK--S-TAV--E--D-Y--S | H                          | -FS-A-----I-GSQ-A-M---       |
|                            | Acinetobacter lwoffii        | 262377442               | ---K-RH-QS-LD-H-D-YT-Q  | NF                         | -A--F--EK-G--GS---I---       |
|                            | Aeromonas salmonicida        | 145299555               | ---AK-RS-TSTLDAD-D-YT-K | N                          | -----Y---K---I-GAR-N-I---    |
|                            | Aggregatibacter aphrophilus  | 251793023               | ---AK-KD-TS-LD-H-D-YT-K | H                          | -KA--Y---K-G-I-GAR-N-I---    |
|                            | Alcanivorax borkumensis      | 110833362               | ---ARHRH-LA-L-AE-D-YT-Q | NFS                        | ---H-----GSQ-N-I---          |
|                            | Alteromonas macleodii        | 196156164               | ---AKHRN-TS-LDEN-D-YT-K | N                          | -S---H---K---I-GAR-N-I---    |
|                            | Arsenophonus nasoniae        | 284006392               | ---AK-KS-TS-LDAH-D-YT-S | N                          | -S-A--H-----I-GAR-N---       |
|                            | Buchnera aphidicola          | 219681508               | ---KK-KK-LSCLDKT-V-YT-R | Y                          | -S--H---A---I-GAR-N-I---     |
|                            | Candidatus Regiella          | 304413741               | ---AKHKE-DSTLDKN-D-YT-C | H                          | -S-A--H-----GAR-N-I---       |
| Cardiobacterium hominis    | 258544914                    | L--TIHK--LR---E--D-YT-R | H                       | -S-A--H---K---GAR-N-I---   |                              |
| Citrobacter rodentium      | 283784224                    | ---AK-KS-TS-LDAE-D-YT-R | N                       | -S-A--H-----I-GAR-N-I---   |                              |
| Colwellia psychrerythraea  | 71278113                     | ---AAHKT-VA-LDDT-D-YT-K | N                       | -S-A--H---K-K-I-GSQ-N---   |                              |
| Cronobacter sakazakii      | 156935045                    | ---AK-KS-TG-LD-E-D-YT-R | N                       | -S-A--H-----I-GAR-N-I---   |                              |
| Dichelobacter nodosus      | 146328961                    | L---R-KE-LR--DET-N-YT-Q | R                       | -S---H---K---I-GAR-N-I---  |                              |
| Edwardsiella ictaluri      | 238918972                    | ---A--KE-TTALD-E-D-YT-R | N                       | -S-A--H-----I-GAR-N-I---   |                              |
| Enhydrobacter aerosaccus   | 257455335                    | -K-AVHRF-QS-LDSA-D-YT-Q | NFS                     | -A--H--FK----SAQ---I---    |                              |
| Enterobacter cancerogenus  | 261341000                    | ---AKHKS-TS-LDSE-D-YT-R | N                       | -S-A--H-----I-GAR-N-I---   |                              |
| Erwinia tasmaniensis       | 188534664                    | ---AK-KD-IS-LDAE-D-YT-R | N                       | -S-A--Y-----I-GAR-N-I---   |                              |
| Escherichia coli           | 147966                       | ---AK-KS-TG-LD-E-D-YT-R | N                       | -S-A--H-----I-GAR-N-I---   |                              |
| Francisella philomiragia   | 167627730                    | ---AKHKD-VSLLD-N-D-YT-Q | NFS                     | ---H---KTQ-I-GSR-N-I---    |                              |
| Francisella tularensis     | 254369198                    | ---K-KD-TS-LD-N-D-YT-K  | NF                      | -K--H---KTK-I-GSR-N-I---   |                              |
| Grimontia hollisae         | 262274807                    | ---AK-KN-TTALD-E-D-YT-R | N                       | -SKA--H-----I-GAR-N-I---   |                              |
| Haemophilus ducreyi        | 33152439                     | ---AK-KN-TT-LDAE-D-YT-K | N                       | -KA--Y---K-G-I-GAR-N-I---  |                              |
| Haemophilus influenzae     | 53732897                     | ---AK-RD-TN-LD-E-D-YT-K | N                       | -KA--Y---K-G-I-GAR-N-I---  |                              |
| Kangiella koreensis        | 256822292                    | L---HNKT-TG-LDEA-D-YT-- | N                       | -S-A--H---K---I-GAK-N-I--- |                              |
| Mannheimia haemolytica     | 261493102                    | ---AK-RN-IT-LD-E-D-YT-K | N                       | -KA--H---K-G-I-GAR-N-I---  |                              |
| Methylococcus capsulatus   | 53805144                     | ---AR-RD-LR--DEE--YT-R  | H                       | -S-A-----G-I-GAR-N-I---    |                              |
| Methylophaga thiooxidans   | 254490694                    | ---RFKH-TG-LD-Y-D-YT-Q  | N                       | -S-A--H---TG---G-R-N-I---  |                              |
| Oceanobacter sp. RED65     | 94501956                     | L--AANKT-HG--D-E-D-YT-Q | NFS                     | -A--H---K-K-IQGT-N-I---    |                              |
| Pantoea ananatis           | 291616516                    | ---AKHKD-VS-LDAE-D-YT-R | N                       | -S-A--H-----I-GAR-N-I---   |                              |
| Pasteurella multocida      | 15602094                     | ---AK-RE-TS-LD-E-D-YT-K | H                       | -KA--Y---K-G-I-GAR-N-I---  |                              |
| Pectobacterium carotovorum | 253687414                    | ---AK-KD-VS-LDEH-D-YT-R | N                       | -S-A--H-----I-GAR-N-I---   |                              |
| Photobacterium damsela     | 269103294                    | ---ASHKT-TT-LD-Q-D-YT-R | N                       | -SKA--H---K---I-GAR-N-I--- |                              |
| Providencia stuartii       | 183601033                    | ---AK-KS-TSTLD-E-D-YT-R | H                       | -S-A--H-----I-GAR-N-I---   |                              |
| Pseudomonas entomophila    | 104780220                    | ---AFHRH-DS-LD-T-D-YT-- | NFS                     | -A--H---K-G--SS--N-I---    |                              |
| Saccharophagus degradans   | 90021053                     | ---AKHRH-TG-LD-T-D-YT-Q | NFS                     | -A--H---K-G-I-GAQ-N-I---   |                              |
| Salmonella enterica        | 62179017                     | ---AKHKS-TS-LDAE-D-YT-R | N                       | -S-A--H-----I-GAR-N-I---   |                              |
| Serratia odorifera         | 270263541                    | ---AKHKD-TS-LDKD-D-YT-R | N                       | -S-A--H-----I-GAR-N-I---   |                              |
| Shewanella sediminis       | 157376027                    | ---ARHRD-TS-LDDK-D-YT-K | N                       | -S-A--Y-----I-GAR-N-I---   |                              |
| Shigella flexneri          | 24111784                     | ---AK-KS-TG-LD-E-D-YT-R | N                       | -S-A--H-----I-GAR-N-I---   |                              |
| Sodalis glossinidius       | 85058624                     | ---AR-KD-VA-LDAE-D-YT-R | N                       | -S-A--H-----I-GAR-N-I---   |                              |
| Tolunomas auensis          | 237808775                    | ---AK-KD-VTSLDAE-D-YT-K | N                       | -K---H-----GAR-N-I---      |                              |
| Vibrio cholerae            | 15640760                     | ---AAHKT-TT-LD-H-D-YT-K | N                       | -SK--H-----I-GAR-N-I---    |                              |
| Xenorhabdus nematophila    | 300721774                    | ---AKHKE-TSSLDEH-D-YT-R | N                       | -S-A--H-----I-GAR-N-I---   |                              |
| β-Proteobacteria           | Marinomonas posidonica       | 333907799               | ---A--RH-I--LDKE-D-YT-K | NFS                        | -A--H---K-Q--VGAQ-N-I---     |
|                            | Methylobacter tundripaludum  | 307822489               | -----EF-TG-LDES--YT-R   | N                          | -S-A-----K-K--GSR-N-I---     |
|                            | Thiomonas sp. 3As            | 294338724               | ---ARFKQ-ER-LDDT-T-AT-R | QFS                        | -A--H---G--FG--A-T---        |
|                            | Achromobacter xylosoxidans   | 311108311               | ---AK-RD-TR-LD-S--HT-A  | NFS                        | -A--H--Q-A--ITGAR-N---       |
|                            | Bordetella avium 197N        | 187477349               | ---AK-RD-TR-LD-S-A-HT-G | HFS                        | -A--H--Q-A--ITGAR-N---       |
| α-Proteobacteria           | Polynucleobacter necessarius | 171464095               | L---G-KD-DR-VD-T-A-YT-Q | NF                         | ----N--QKA--I-GSQ-N-I---     |
|                            | Neisseria meningitidis       | 218767841               | -K-AKHKL-KR--DES-T-Y--Q | NFS                        | -A--H--H-AG-I-GAQ-N-I---     |
|                            | Rickettsia prowazekii        | 15604558                | ---K--D-KE-L-HD-K-P---  | N                          | -KA--H--V-IR-I-G--M-W---     |
|                            | Acidiphilium cryptum         | 148260343               | L--ARF-AEDR-LD-A-P-L--A | RHS                        | -A--H--F--D---G---L-T---     |
|                            | Sphingobium chlorophenolicum | 334344808               | ---ARF-E--G-LD-R--PV-S  | TWS                        | -A--H--VKAG--GA--M-Q--I      |
| Granulibacter thesedensis  | 114326954                    | M--AR--D-GR--D-A-D-P--- | RHS                     | -A--H--F-AG--G---L-W---    |                              |

Figure S6

Partial sequence alignment of a conserved region in the queuine tRNA-ribosyltransferase showing a 1 aa insert that is specific for all Xanthomonadales.
