# Supplementary material for: Phylogenomics and Molecular Signatures for Species from the Plant Pathogen-Containing Order Xanthomonadales
Source: PubMed Central journal article supplement (PMC3568101; doi:10.1371/journal.pone.0055216), 2013-02-08
Supplement: pone.0055216.s007.pdf [file pone.0055216.s007.pdf]

|                              |                               |                                  |                                   |                |                |
|------------------------------|-------------------------------|----------------------------------|-----------------------------------|----------------|----------------|
|                              | Xylella fastidiosa            | 71275623                         | HQFCRIGRYAFIGMGLINGDVPFPLIGSDT    | L              | GRPRGINNEGLKRR |
| Xanthomonadales              | Xanthomonas campestris        | 78047022                         | -----AH--L--A-T-----MV--S         | -              | -----S-----    |
|                              | Xanthomonas fuscans           | 294623975                        | -----AH--L--A-T-----MV--ES        | -              | -----S-----    |
|                              | Xanthomonas axonopodis        | 21242162                         | -----AH--L--A-T-----MV--ES        | -              | -----S-----    |
|                              | Xanthomonas oryzae            | 166712744                        | -----AH--L--A-T-----MV--RES       | -              | -----S-----    |
|                              | Xanthomonas albilineans       | 285018802                        | -----DH--L--A-----IMV--GNS        | -              | -----S-----    |
|                              | Xanthomonas vesicatoria       | 325916629                        | -----AH--L--A-T-----MV--ES        | -              | -----S-----    |
|                              | Xanthomonas gardneri          | 325923966                        | -----AH--L--A-T-----MV--ES        | -              | -----S-----    |
|                              | Xanthomonas perforans         | 325929588                        | -----AH--L--A-T-----MV--S         | -              | -----S-----    |
|                              | Pseudoxanthomonas spadix      | 357417818                        | -----AH-----A-VG---T---MVAE--E    | H              | -----S---R--   |
|                              | Rhodanobacter sp. 2APBS1      | 352086327                        | ---KV-AH-----C-VGH---VMMANEQ      | Q              | -----S-----    |
| Stenotrophomonas maltophilia | 190573491                     | -----AH--L--A-T-----MV--T-S      | -                                 | -----S-----    |                |
| Stenotrophomonas sp. SKA14   | 254524358                     | -----AH--L--A-T-----MV--T-S      | -                                 | -----S-----    |                |
| Other                        | Aeromonas hydrophila          | 117618038                        | ---G-V-SH--V-GCAAL-K---YVMAAGNY   |                | AK-F-V-S---R-- |
|                              | Aeromonas salmonicida         | 145300049                        | ---G-V-SH--GCAAL-K---YVMAAGNY     |                | AK-F-V-S---R-- |
|                              | Aliivibrio salmonicida        | 209695839                        | ---TV-AHS--GASVVVQ---VMAAGNH      |                | CK-F--I-----   |
|                              | Alkalilimnicola ehrlichii     | 114321003                        | -----A--C-F-SV--R--L---TVSGHM     |                | AQ-H---VV--R-H |
|                              | Allochromatium vinosum        | 288941770                        | -----AH--CA--SVLTR---YVTV--GHP    |                | AE-H---S-----  |
|                              | Alteromonadales bacterium     | 119471155                        | ---K--AH-----YSGV-K---VTTIGMP     |                | AG-AA-K--M---  |
|                              | Alteromonas macleodii         | 239992968                        | ---K--AHS-L-A-GI-LR---VMVSGQK     |                | NI-Q---S-----  |
|                              | Azotobacter vinelandii        | 226945929                        | --H-Q--AHS-V--SGVSK--A-VTVLGSP    |                | AQA-SM-F--MR-- |
|                              | Cellvibrio japonicus          | 192362392                        | ---K--AHS-S--SA-GK--AYVMVNGSP     |                | AEAKN-A--R--   |
|                              | Citrobacter koseri            | 157147387                        | ---T--AHVMV-GCSGVAQ---YVIAQGNH    |                | AT-F-V-I-----  |
|                              | Colwellia psychrerythraea     | 71279846                         | ---H--AHS--AGNA--LK--AYVMAAGQP    |                | AK-F-L-S-----  |
|                              | Congregibacter litoralis      | 88706744                         | -----QHS-S-Q-A-GK--AYVTVSGSP      |                | AEAKT--T---R-- |
|                              | Enterobacter cancerogenus     | 288549317                        | ---I--AHVMV-GCSGVAQ---YVIAQGNH    |                | AT-F-V-I-----  |
|                              | Halorhodospira halophila      | 121998238                        | -----P---C-F-SG--R-----VTVSGQM    |                | AV-H---SV--R-H |
|                              | Idiomarina baltica            | 85712983                         | ---H--SH--AAVNSIVVQ-I---IMAQGNH   |                | A---T--S-----  |
|                              | Klebsiella pneumoniae         | 152968775                        | ---V--SHVMV-GCSGVAQ---VIAQGNH     |                | AT-F-V-I-----  |
|                              | Methylococcus capsulatus      | 53803395                         | ---Q--S-SA--SV-SR---YVMV--GRP     |                | TK-H---AV--E-N |
|                              | Nitrococcus mobilis           | 88812389                         | ---S-L--HC-LAF-AHVDR---YVMAAGQR   |                | AT----IK--Q-H  |
|                              | Oceanospirillum sp. MED92     | 89092100                         | ---K--SHVMC-TS-VVLK-I-AYVMANGN-   |                | AT-H---T-----  |
|                              | Photobacterium profundum      | 54310072                         | ---TV-AHC--G-SIVVK---YVMAQGNH     |                | AK-F---I-----  |
| Photorhabdus symbiotica      | 253988137                     | ---Q--SH-MV-GCSGVVQ---YVIAQGNH   |                                   | AT-F-V-I-----  |                |
| Proteus penneri              | 226327037                     | ---Q--SHVMV-GCSGVAQ---VIAQGNH    |                                   | AT-Y-L-I-----  |                |
| Providencia alcalifaciens    | 212710385                     | ---Q--AHVMV-GCSGVAQ---YVIAQGNH   |                                   | AT-F-L-L-----  |                |
| Pseudomonas aeruginosa       | 15598840                      | ---Y---AHS-S--SA-GK--AYVTVFGNP   |                                   | AEA-SM-F--MR-- |                |
| Shewanella amazonensis       | 119774288                     | ---VH--DH--TAGCS-LLQ-----VMAAGQP |                                   | AI---L-S-----  |                |
| Shigella flexneri            | 110804233                     | ---I--AHVMV-GCSGVAQ---YVIAQGNH   |                                   | AT-F-V-T-----  |                |
| Thiomicrospira crunogena     | 78485618                      | ---N--EHS-C--SV--Q--N-VTVSGNL    |                                   | AG--L-L-V----- |                |
| Tolumonas auensis            | 237808844                     | ---G-V-SH--AGMAAL-K---YVMAAGHY   |                                   | AT-F--S---R--  |                |
| Vibrio cholerae              | 254225763                     | ---H--DHCML-G-SIVVQ---YVMAQGNH   |                                   | CA-F--V-----   |                |
| α-Proteobacteria             | Asticcacaulis excentricus     | 315499841                        | ---A-----S-V-GAAMVTK--I-YGVSVWGNH |                | A-LE-L-LV----- |
|                              | Caulobacter segnis            | 295689586                        | ---S-----S--GLAAVTK--I-YGVSVWGNH  |                | AHLE-L-LV----- |
|                              | Hyphomonas neptunium          | 114799420                        | ---S-----N---G-AIVVE--I--GSVWGNH  |                | AHLS-L-IV----- |
|                              | Parvibaculum lavamentivorans  | 154253623                        | ---G-V-KH--V-GMSAVEN--I-YG-VVGNR  |                | AHLM-L-LI----- |
|                              | Nitrobacter hamburgensis      | 92117252                         | ---A-----Q-M--GL-G-R---I-YGFVNGQH |                | -HLE-L-VV-MR-- |
|                              | Rhodospirillum rubrum         | 83592932                         | ---V---KH-MV-GLSAVES--I--GSVIGNR  |                | AKLA-L-IV-M--- |
|                              | Methylocystis sp. ATCC 49242  | 323137315                        | --NV--AHV--GLAGVE---I--G-A-GNR    |                | AHLF-V-LV-VR-- |
| β-Proteobacteria             | Phenylobacterium zucineum     | 197105231                        | ---T-V--H-M--GLAAVVK--I-YGVSVWGNH |                | AHLE-L-LV----- |
|                              | Dechloromonas aromatica       | 71907384                         | -----AHVMTAVS-V-LQ---YLMAAGN-     |                | AQ-Y---V-----  |
|                              | Gallionella capsiferriformans | 302878992                        | ---V---AHIIIT---ILLQ---V-VSGNP    |                | SA-H---S-----  |
|                              | Aromatoleum aromaticum        | 56478863                         | ---V-V-AHS-C-V--VLLQ-L---VTVAGNP  |                | AK-H---S---R-- |
|                              | Thiomonas intermedia          | 296136567                        | ---V---AHVMT-ISSV-LQ---Y--VAGNP   |                | AK-H---A---R-- |
|                              | Laribacter hongkongensis      | 226941198                        | ---T--AH-MVAG-SI-VQ---YVMAAGNH    |                | AS-V---S-----  |
|                              | Polynucleobacter necessarius  | 145589620                        | ---V---QH-ML-GASALVQ-I---VIAAG-K  |                | AS-H---V-----  |
| Oxalobacteraceae bacterium   | 329912024                     | ---K--AH-MV--S-SLTQ---VMLSGNP    |                                   | AAAH---V-----  |                |
| Burkholderia ubonensis       | 167586867                     | ---V---AH-ML-GASALVQ---VIAAGNK   |                                   | AE-H---V---R-- |                |

Figure S7

Partial sequence alignment of a conserved region in the acyl-(acyl-carrier-protein)--UDP-N-acetylglucosamine O-acyltransferase showing a 1 aa insert that is commonly shared by all Xanthomonadales.
