# Supplementary material for: Phylogenomics and Molecular Signatures for Species from the Plant Pathogen-Containing Order Xanthomonadales
Source: PubMed Central journal article supplement (PMC3568101; doi:10.1371/journal.pone.0055216), 2013-02-08
Supplement: pone.0055216.s008.pdf [file pone.0055216.s008.pdf]

|                           |                                | 177                                      | 217                                         |
|---------------------------|--------------------------------|------------------------------------------|---------------------------------------------|
|                           | Xanthomonas campestris         | 21232451                                 | GTVFGIMVTMHDM V SSGEQAGIAAVAPGISEALFATAIGLF |
|                           | Xanthomonas axonopodis         | 21243871                                 | -----                                       |
|                           | Xanthomonas oryzae             | 166712986                                | -----                                       |
|                           | Xanthomonas albilineans        | 285019186                                | ----- I N - Q -----                         |
| Xanthomonadales           | Xanthomonas gardneri           | 325923400                                | -----                                       |
|                           | Xanthomonas vesicatoria        | 325917787                                | -----                                       |
|                           | Pseudoxanthomonas spadix       | 357416650                                | ----- L N -----                             |
|                           | Pseudoxanthomonas suwonensis   | 319786282                                | ----- - Q - Q - V - - S - -----             |
|                           | Stenotrophomonas maltophilia   | 194366894                                | ----- I - - - A -----                       |
|                           | Stenotrophomonas sp. SKA14     | 254521584                                | ----- I - - - A -----                       |
|                           | Xylella fastidiosa             | 71275799                                 | ----- I - - - D ----- V - - -               |
|                           | Rhodanobacter sp. 2APBS1       | 352080106                                | ---W---GAFQGL GEMKDVT--V---H----I---M---    |
|                           | Acidithiobacillus caldus       | 255020127                                | ---W---T-FMNI GAAQ--TL-T---PVA---I--LA---   |
|                           | Alcanivorax borkumensis        | 110833616                                | ---W---NSFMAL ANVK--TL-SV----A---I-----     |
| Alcanivorax sp. DG881     | 254427665                      | ---W---NSFMAL ANVK--TL-SV----A---I-----  |                                             |
| Aliivibrio salmonicida    | 209695362                      | ---W---HSFIAL GAVK--TL-M----A---V---M--- |                                             |
| Alkalilimnicola ehrlichii | 114319407                      | ---W---NSFRAL GEMQ--TL-T----A---I---L--- |                                             |
| Allochroamium vinosum     | 288940687                      | ---W---QSF-AL GNV--TL-L-----V-----       |                                             |
| Alteromonadales bacterium | 119472452                      | ---W---NAFIAL GEVK--TLQM----A---I---M--- |                                             |
| Azotobacter vinelandii    | 226945716                      | ---W---NSFRGL AQVQ--TLST----A---V---M--- |                                             |
| Cellvibrio japonicus      | 192362359                      | ---W---SFLNI ANAG-PSL-T----A---I---M---  |                                             |
| Colwellia psychrerythraea | 71279709                       | ---W---NSFIAL GAVK--TL-M----A---I---M--- |                                             |
| Coxiella burnetii         | 29654865                       | ---W---TSFRAL GAVQ-VT--M-----I---V---    |                                             |
| Grimontia hollisae        | 262276106                      | ---W---HAFIAL GAVK--TL-M----A---V---M--- |                                             |
| Other                     | Hahella chejuensis             | 83647599                                 | ---W---NSFRGL AHLQ--T-ST-----I---M---       |
|                           | Idiomarina loihiensis          | 56460191                                 | ---W---NAFIAL GAVQ--TL-M----A---I---M---    |
| γ-Proteobacteria          | Legionella drancourtii         | 254499314                                | ---W---TSFQAL GHAQ--T--M-----V---L---       |
|                           | Marinobacter algicola          | 149375114                                | ---W---NSFRGL AQVQ--TL-T-----I---M---       |
|                           | Marinobacter aquaeolei         | 120554622                                | ---W---NSFRGL AQVQ--TL-T-----I---M---       |
|                           | Marinomonas sp. MED121         | 87118955                                 | ---W---HSFIAL AEVQ--TL-T----A---I---L---    |
|                           | Methylococcus capsulatus       | 53804467                                 | ---W---NSFRSL G-VK--TL-M-----V---M---       |
|                           | Moritella sp. PE36             | 149910562                                | ---W---SSFIAL GAVQ--TL-M----A---I---M---    |
|                           | Nitrosococcus halophilus       | 292490338                                | ---W---NSFRAL GNAH--TL-M----A---I---M---    |
|                           | Oceanospirillum sp. MED92      | 89094840                                 | ---W---NSFRGL ANVH--TL-S-----I-----         |
|                           | Photobacterium profundum       | 54309714                                 | ---W---HAFIAL GAVK--TL-M----A---V---M---    |
|                           | Pseudomonas aeruginosa         | 15596166                                 | ---W---NSFRGL ATVQ--TL-T-----A---I-----     |
| Psychromonas ingrahamii   | 119944495                      | ---W---NSFIAL GEVQ--TLTM----A---I---M--- |                                             |
| Shewanella baltica        | 126173972                      | ---W---NSFIAI G-M-N-TL-M----A---I---M--- |                                             |
| Teredinibacter turnerae   | 254787338                      | ---W---NSFRGL ANVH--TL-T-----V---M---    |                                             |
| Vibrio cholerae B33       | 153824285                      | ---W---HAFIAL GEVK--TL-M----A---I-----   |                                             |
| β-Proteobacteria          | Nitrosomonas eutropha          | 114330313                                | ---W---NAFREL -NVG--T--H----A---I---M---    |
|                           | Sutterella wadsworthensis      | 319941768                                | ---W---NAFTGL -L-N-SL-V----A---V-----       |
|                           | Herminiimonas arsenicoxydans   | 134095581                                | ---W---NSFRGL ANVQ--TL-----A---I-----       |
|                           | Dechloromonas aromatica        | 71909665                                 | ---W---HAFRGL -NVG--TL-S----A---V-----      |
|                           | Janthinobacterium sp. Marseill | 152980246                                | ---W---NAFRGL ANVQ--TL-----A---I-----       |
|                           | Herbaspirillum seropedicae     | 300310552                                | ---W---NAFRGL ANVQ--TL-----A---I-----       |
|                           | Oxalobacteraceae bacterium     | 329907985                                | ---W---NAFRGL ANVQ--TL-S----A---V-----      |
|                           | Burkholderia multivorans       | 161525753                                | ---W---NSFRGL ANVQ--TL-N----A---V-----      |
|                           | Achromobacter xylosoxidans     | 338781342                                | ---W---HAFIQL -NMQ--TL-S----A---I-----      |
|                           | Sideroxydans lithotrophicus    | 291612987                                | ---W---NAFRGL -NVG--TL-Q----A---V---M---    |
| α-Proteobacteria          | Methylobacterium radiotolerans | 170747181                                | ---W---TAFTSI AASKNTSL-V----A-----          |
|                           | Rickettsia massiliae           | 157964385                                | ---W---HSFQSI ATSNNTSL-V----A---L-----      |
|                           | Methylobacterium populi        | 188584488                                | ---W---TAFTSI AASKNTSL-V----A-----          |

**Figure S8**

Partial sequence alignment of a conserved region in the ToIQ protein showing a 1 aa insert that is commonly shared by all Xanthomonadales
