# Supplementary material for: Phylogenomics and Molecular Signatures for Species from the Plant Pathogen-Containing Order Xanthomonadales
Source: PubMed Central journal article supplement (PMC3568101; doi:10.1371/journal.pone.0055216), 2013-02-08
Supplement: pone.0055216.s009.pdf [file pone.0055216.s009.pdf]

|                                   |                                     | 607                        |                                             | 661                                         |
|-----------------------------------|-------------------------------------|----------------------------|---------------------------------------------|---------------------------------------------|
| Xanthomonadales                   | <i>Stenotrophomonas maltophilia</i> | 194366795                  | WPANALVGVRLPLFPNPEDEGADSNNGAR               | FELMRVDAAGKQPANGLKITLVRELRDY                |
|                                   | <i>Stenotrophomonas sp. SKA14</i>   | 254522704                  | -----D-----                                 | -----N----K-----                            |
|                                   | <i>Xylella fastidiosa</i>           | 71900852                   | ---D-----DVAS---A-M--                       | ---T--GVD---S-K--A-----                     |
|                                   | <i>Xanthomonas fuscans</i>          | 294627964                  | ---K-----DD---A-T--                         | --VT---D-----K--V-----                      |
|                                   | <i>Xanthomonas campestris</i>       | 289667502                  | ---K-----DDA---A-T--                        | --VT---D-----K--V-----                      |
|                                   | <i>Xanthomonas axonopodis</i>       | 21241899                   | ---K-----DDG---A-T--                        | --VT---D-----K--V-----                      |
|                                   | <i>Xanthomonas perforans</i>        | 325925285                  | ---K-----DDA---A-T--                        | --VT---D-----K--V-----                      |
|                                   | <i>Xanthomonas vesicatoria</i>      | 325915165                  | ---K-----DDK---A-T--                        | ---T---D-----K--A-----                      |
|                                   | <i>Xanthomonas gardneri</i>         | 325922888                  | ---K-----DDK---A-T--                        | ---IT---D-----K--A-----                     |
|                                   | <i>Pseudoxanthomonas spadix</i>     | 357417253                  | ---AV-----DDKQ-S-A--T-G                     | ---IA-M--T--RLSGQ---V----R---               |
|                                   | <i>Pseudoxanthomonas suwonensis</i> | 319786934                  | ---P-----E-A--PAES--G                       | ---V---Q-----R--EL-----                     |
|                                   | <i>Rhodanobacter sp. 2APBS1</i>     | 352080521                  | ---D-----D-KQ--E-EAP-G                      | ---IV-AN-N-ERVAGAH--VR-Q----F               |
|                                   | <i>Citrobacter koseri</i>           | 157144543                  | --TDT-P-I--Q-ASKAVY-YRTD-T                  | --DIVYA--Q-NKKA-S--QVR-I--R---              |
|                                   | <i>Cronobacter sakazakii</i>        | 156932934                  | ---D---I--Q-GEKAVY-YRTDDT                   | --DIVYAN-Q-EKVAVK---VR----R---              |
|                                   | <i>Enterobacter cancerogenus</i>    | 261340828                  | ---A--P-I--Q-ASKAVY-YRTDTT                  | --DIVYA--T-AKKA--QVR---R---                 |
|                                   | <i>Escherichia coli</i>             | 293415788                  | ---D--P-L--Q-ASKSVY-YRTDST                  | --DIVYS--Q-VKKA--QVR-I--R---                |
|                                   | <i>Klebsiella pneumoniae</i>        | 206580715                  | ---G--P-I--Q-TLK-VY-YRTDTT                  | --DIVYA--K-EKKA--QVR-I--R---                |
| <i>Photobacterium asymbiotica</i> | 253988861                           | ---EK---I---GQKQVYNYRTGRD  | ---VYA--N-EKYA-KD-TAR--Y-R---               |                                             |
| <i>Proteus mirabilis</i>          | 227356217                           | ---TH-A-I--V-AKKEVY-YRNDKY | ---IVYT-QE--KL--DD--VRFIY-RY---             |                                             |
| <i>Providencia alcalifaciens</i>  | 212710621                           | ---KK---I---EKKEIY-YRTDRY  | ---IVMS-M--HKLA-EN-TAR--Y-R---              |                                             |
| Other Bacteria                    | <i>Pseudomonas syringae</i>         | 302185183                  | ---EH-P--A--GSSTSS-DYDDEA                   | ---IVMA---NKL--DNV-VR---R---                |
|                                   | <i>Salmonella enterica</i>          | 161502313                  | ---DT-P-I--Q-TAKAVY-YRTD-T                  | --DIVYAN-Q-EKKA--QVR-I--R---                |
|                                   | <i>Serratia proteamaculans</i>      | 157371850                  | ---D--P-I---KQIY-YRS-SY                     | QAQPVVDENTQAG--DIVYAN--EKLAVS--AR----R---   |
|                                   | <i>Shigella boydii</i>              | 187733068                  | ---D--P-L--Q-ALKSVY-YRTDST                  | --DIVYS--Q-VKKA--QVR-I--R---                |
|                                   | <i>Xenorhabdus bovienii</i>         | 290476010                  | ---EK-A-I----KKSINYRTGHD                    | --DVVYA--S--KYAT-D-RTR-IY-R---              |
|                                   | <i>Xenorhabdus nematophila</i>      | 300724160                  | ---KQ-----KKTINYSTGKD                       | ---IAYA--K--KYATSE-RAR-IY-R---              |
|                                   | <i>Yersinia aldovae</i>             | 238758827                  | ---D--A-I----KQVY-YRSDSY                    | ---IIYAN-S--KLA-D--VK----R---               |
|                                   | <i>Yersinia mollaretii</i>          | 238797957                  | ---D--A-I----KQVY-YRSDSY                    | ---IIYAN-S--KLA-D--VK----R---               |
|                                   |                                     |                            |                                             | VNQPIVDEGGNAA--DIVYA--Q-NKKA-S--QVR-I--R--- |
|                                   |                                     |                            |                                             | VSQPMVDENGNG--DIVYAN-Q-EKVAVK---VR----R---  |
|                                   |                                     |                            | VNQPIVDENGNA--DIVYA--T-AKKA--QVR---R---     |                                             |
|                                   |                                     |                            | VKQPIVDEGSNA--DIVYS--Q-VKKA--QVR-I--R---    |                                             |
|                                   |                                     |                            | VKQPVVDENSNA--DIVYA--K-EKKA--QVR-I--R---    |                                             |
|                                   |                                     |                            | QSRYNVDENSLAE--VYA--N-EKYA-KD-TAR--Y-R---   |                                             |
|                                   |                                     |                            | KSGYSVDENSMAE--IVYT-QE--KL--DD--VRFIY-RY--- |                                             |
|                                   |                                     |                            | AKRYNVDENSLAE--IVMS-M--HKLA-EN-TAR--Y-R---  |                                             |
|                                   |                                     |                            | KGEAQTNGDGPAD--IVMA---NKL--DNV-VR---R---    |                                             |
|                                   |                                     |                            | VNQPIVDEDSNA--DIVYAN-Q-EKKA--QVR-I--R---    |                                             |
|                                   |                                     |                            | QAQPVVDENTQAG--DIVYAN--EKLAVS--AR----R---   |                                             |
|                                   |                                     |                            | VKQPIVDEGSNA--DIVYS--Q-VKKA--QVR-I--R---    |                                             |
|                                   |                                     |                            | ENRYNVDENSLAE--DVVYA--S--KYAT-D-RTR-IY-R--- |                                             |
|                                   |                                     |                            | ENRYNVDENSQAE--IAYA--K--KYATSE-RAR-IY-R---  |                                             |
|                                   |                                     |                            | KSQAMVDQDQTAD--IIYAN-S--KLA-D--VK----R---   |                                             |
|                                   |                                     |                            | KSQAMVDQDQTAD--IIYAN-S--KLA-D--VK----R---   |                                             |

**Figure S9**

Partial sequence alignment of a conserved region in alpha-2-macroglobulin domain-containing protein showing a 13 aa deletion that is uniquely present in all Xanthomonadales.

Alpha and beta have 1-5 aa deletion at the same position
