# Supplementary material for: Phylogenomics and Molecular Signatures for Species from the Plant Pathogen-Containing Order Xanthomonadales
Source: PubMed Central journal article supplement (PMC3568101; doi:10.1371/journal.pone.0055216), 2013-02-08
Supplement: pone.0055216.s010.pdf [file pone.0055216.s010.pdf]

|                                    |                                     |                       |                        |                          |
|------------------------------------|-------------------------------------|-----------------------|------------------------|--------------------------|
| Xanthomonadales                    | <i>Xanthomonas oryzae</i>           | 84624476              | FVGSLLKKDTEIVDWAAGWVPE | GELVQESYVNLIPTAQHGTHVNGL |
|                                    | <i>Xanthomonas campestris</i>       | 289662651             | -----A----             | -----G-----              |
|                                    | <i>Xanthomonas fuscans</i>          | 294663738             | -----A----             | -----G-----              |
|                                    | <i>Xanthomonas axonopodis</i>       | 21242463              | -----A----             | -----G-----              |
|                                    | <i>Xanthomonas gardneri</i>         | 325924529             | -A-----A----           | -----G-----              |
|                                    | <i>Xanthomonas vesicatoria</i>      | 325916059             | -A-----A----           | -----G-----              |
|                                    | <i>Xanthomonas albilineans</i>      | 285017938             | -----R-----A-VD        | -D-----G-----            |
|                                    | <i>Pseudoxanthomonas spadix</i>     | 357417807             | ---G---Q-----LA---     | -----P-----              |
|                                    | <i>Pseudoxanthomonas suwonensis</i> | 319786497             | -S-A---E--V---VA-I--   | -----G-----              |
|                                    | <i>Stenotrophomonas maltophilia</i> | 190573692             | ---N-----V---VA-L--    | -----G-----              |
|                                    | <i>Stenotrophomonas sp. SKA14</i>   | 254524349             | ---N-----V---VA-L--    | -----G-----              |
|                                    | <i>Xylella fastidiosa</i>           | 15837887              | -I-C-----V---VA---     | ---T-----P-----          |
|                                    | <i>Rhodanobacter sp. 2APBS1</i>     | 352081276             | --HQMAR-I-GMEV-LA-L-   | -----G-----              |
|                                    | <i>Aeromonas hydrophila</i>         | 117618295             | ---AFSTEQSA---LC-L--   | G--CLA-----G-----        |
|                                    | <i>Aeromonas salmonicida</i>        | 145297604             | ---AFSTEQSA---LC-L--   | G--CLA-----P-G-----      |
|                                    | <i>Aggregatibacter aphrophilus</i>  | 251792940             | -I-EF-GEK-A-S--LL-L--  | G---IG-----LG-----       |
|                                    | <i>Alcanivorax borkumensis</i>      | 110835355             | -N-AMSAE--A---VT-L--   | G---A-----G-----         |
|                                    | <i>Alcanivorax sp. DG881</i>        | 254427031             | -N-AMSAE--A---VT-L--   | G---I--A-----G-----      |
|                                    | <i>Alkalilimnicola ehrlichii</i>    | 114320108             | -I-RMSS-H-AAE--VT-L--  | G---AIT-----G-----       |
| <i>Alteromonas macleodii</i>       | 196158482                           | ---NFTGN--AA--VM-L--  | G-D-T-----G-----       |                          |
| <i>Arsenophonus nasoniae</i>       | 284008571                           | ---NFAGQL-M---LL-L--  | G---LT-----G-----      |                          |
| <i>Azotobacter vinelandii</i>      | 226946371                           | -T--FAASR-A-E--LL-L-- | G--FRS-----D-G-----    |                          |
| <i>Candidatus Regiella</i>         | 304413731                           | -I-TFSAA--AI---LL-L-- | G---LT-----I-G-----    |                          |
| <i>Cellvibrio japonicus</i>        | 192360165                           | ---DF-AE--AIS--VQ-L-- | G-----G-----           |                          |
| <i>Chromohalobacter salexigens</i> | 92114662                            | -L-HFEDEDQG---IQ-L--  | G---L-----PLG-----     |                          |
| <i>Congregibacter litoralis</i>    | 88705315                            | -T--FSGS--A---VQ-L--  | G---IT-----G-----      |                          |
| <i>Cronobacter sakazakii</i>       | 156932596                           | -I-NFSGE--A---LL-L--  | G---LT-----M-G-----    |                          |
| <i>Dickeya dadantii</i>            | 242241013                           | -T-TISG--A-E--LL-L--  | G---LT-----P-G-----    |                          |
| <i>Edwardsiella ictaluri</i>       | 238918166                           | -T-TFAS--A---LL-L--   | G---LT-----P-G-----    |                          |
| <i>Enterobacter cloacae</i>        | 296104690                           | ---NFTG--A---LL-L--   | G---LT-----MLG-----    |                          |
| <i>Erwinia tasmaniensis</i>        | 188532591                           | ---TFSG-V-A---LL-L--  | G---LT-----M-G-----    |                          |
| <i>Escherichia albertii</i>        | 170765612                           | -I-NFNGE--A---LL-L--  | G---LT-----M-G-----    |                          |
| <i>Grimontia hollisae</i>          | 262274994                           | ---EFSASN-AA--VI-L--  | G---IT-----G-----      |                          |
| <i>Haemophilus influenzae</i>      | 145629698                           | ---EF-GAN-A-S--LL-L-- | G---IG-----I-G-----    |                          |
| <i>Idiomarina loihiensis</i>       | 56461054                            | -D--FSSQ--G---VT-L--  | G--G-S-----TLG-----    |                          |
| <i>Kangiella koreensis</i>         | 256823223                           | -T---QGEA-A---FM-L--  | G--CLA-----P-G-----    |                          |
| <i>Mannheimia haemolytica</i>      | 254362507                           | -I-DVTAE--A-S--LT-L-- | G---A-----G-----       |                          |
| <i>Nitrosococcus oceanii</i>       | 77165746                            | -T-EMQGN--E-C--FT-L-- | G--V-T-----P-G-----    |                          |
| <i>Oceanobacter sp. RED65</i>      | 94500377                            | -E--MSGN--A---VQ-L--  | G--QLM-----G-----      |                          |
| <i>Pantoea ananatis</i>            | 291618921                           | ---TFAG-I-A---LL-L--  | G---LT-----M-G-----    |                          |
| <i>Pasteurella multocida</i>       | 15602235                            | -I-DF-G--A-S--LL-L--  | G-D-LS-----I-G-----    |                          |
| <i>Pectobacterium carotovorum</i>  | 227112782                           | -L--ITG--A---LL-L--   | G---LT-----PMG-----    |                          |
| <i>Photobacterium damsela</i>      | 269103508                           | -T--FSGQ--AA---LL-L-- | G---IT-----G-----      |                          |
| <i>Photorhabdus asymbiotica</i>    | 253991001                           | ---AFSGE--A---LL-L--  | G---LA-----M-G-----    |                          |
| <i>Proteus mirabilis</i>           | 197286191                           | -T-KFEG-N-A-E-SML-L-- | G-D-LT-----V-G-----    |                          |
| <i>Providencia stuartii</i>        | 183597858                           | -T-EFSGES-AAE--LL-L-- | G---LT-----G-----      |                          |
| <i>Pseudomonas aeruginosa</i>      | 4176381                             | -C-N-EGSK-A-S--LL-L-- | G--S-----G-----        |                          |
| <i>Reinekea sp. MED297</i>         | 88797038                            | -T--FSS-E-A---VQ-L--  | G--GLF-----P-G-----    |                          |
| <i>Saccharophagus degradans</i>    | 90020023                            | ---FTGT--AA--VQ-L--   | G--VT-----G-----       |                          |
| <i>Salmonella enterica</i>         | 161506253                           | -I-NFNGE--A---LL-L--  | G---LT-----M-G-----    |                          |
| <i>Serratia odorifera</i>          | 270263149                           | -I-NFAG--A---LL-L--   | G---LT-----M-G-----    |                          |
| <i>Shewanella benthica</i>         | 163749330                           | -I---QGNK-A---IT-L--  | G--YLN-----PLG-----F   |                          |
| <i>Shigella flexneri</i>           | 30064380                            | -I-NFAG--A---LL-L--   | G---LT-----M-G-----    |                          |
| <i>Shigella sonnei</i>             | 74313568                            | -I-NFAG--A---LL-L--   | G---LT-----M-G-----    |                          |
| <i>Sodalis glossinidius</i>        | 85058249                            | ---AVSG--T---VLL-L--  | G---LT-----P-G-----    |                          |
| <i>Teredinibacter turnerae</i>     | 254787783                           | ---FSAA--AA--VQ-L--   | G--IT-----G-----       |                          |
| <i>Thioalkalivibrio sp. K90mix</i> | 289209261                           | -M--VSGA--AA--VT-L--  | G--V-S-----T-G-----    |                          |
| <i>Tolomonas auensis</i>           | 237807171                           | -T-QFSA-NSA---LC-L--  | G--IS-----V-G-----     |                          |
| <i>Yersinia kristensenii</i>       | 238762440                           | ---FAG--AI---LL-L--   | G---LT-----M-G-----    |                          |

Figure S10

Partial sequence alignment of a conserved region of DNA topoisomerase IV subunit B showing a 1 aa deletion that is commonly present in all Xanthomonadales.
