# Supplementary material for: Phylogenomics and Molecular Signatures for Species from the Plant Pathogen-Containing Order Xanthomonadales
Source: PubMed Central journal article supplement (PMC3568101; doi:10.1371/journal.pone.0055216), 2013-02-08
Supplement: pone.0055216.s011.pdf [file pone.0055216.s011.pdf]

|                                       |                                     |                      |                      |                     |
|---------------------------------------|-------------------------------------|----------------------|----------------------|---------------------|
| Xanthomonadales                       | <i>Stenotrophomonas maltophilia</i> | 194367713            | GEPTGALFGVVNMLRSTLKE | RPAYVAFVVDAPGKTFRD  |
|                                       | <i>Stenotrophomonas</i> sp. SKA14   | 254524679            | -----                | -----               |
|                                       | <i>Xanthomonas campestris</i>       | 78049756             | -----A----           | -----               |
|                                       | <i>Xanthomonas fuscans</i>          | 294626790            | -----A----           | ---I-----           |
|                                       | <i>Xanthomonas axonopodis</i>       | 21244827             | -----A----           | ---I-----           |
|                                       | <i>Xanthomonas albilineans</i>      | 285016940            | -----A----           | --E-----            |
|                                       | <i>Xanthomonas oryzae</i>           | 58583863             | -----A----           | ---I-----           |
|                                       | <i>Xanthomonas vesicatoria</i>      | 325917393            | -----A----           | -----               |
|                                       | <i>Xanthomonas gardneri</i>         | 325923784            | -----A----           | -----               |
|                                       | <i>Xanthomonas perforans</i>        | 325924860            | -----A----           | ---I-----           |
|                                       | <i>Pseudoxanthomonas spadix</i>     | 357415770            | -----A----           | --E-I---I----       |
|                                       | <i>Pseudoxanthomonas suwonensis</i> | 319788387            | -----A----           | K-D-----            |
|                                       | <i>Rhodanobacter</i> sp. 2APBS1     | 352086477            | --A-----A--A         | K-D-L--S---P----    |
|                                       | <i>Xylella fastidiosa</i>           | 71276059             | -----T----           | --D-A---I-----      |
|                                       | <i>Actinobacillus succinogenes</i>  | 152977709            | -----M--L--K-LISQ    | V--SHI-V-F--K-----  |
|                                       | <i>Aggregatibacter aphrophilus</i>  | 251793585            | -----MY--L--K-LISQ   | V Q-SHI-V-F--K----- |
|                                       | <i>Alcanivorax borkumensis</i>      | 110835520            | -Q---VR--AS--KLI-D   | Y D-Q-M-VIF--K----- |
|                                       | <i>Alliivibrio salmonicida</i>      | 209693839            | -----VY--I--L--Q     | F ETNRI-VIF--K----N |
|                                       | <i>Alkalilimnicola ehrlichii</i>    | 114322007            | -----MY--L--V-KL-DD  | Y --ERI-V-F--R----  |
|                                       | <i>Alteromonas macleodii</i>        | 196154841            | -QD---IY-----K-LI-Q  | Y N-THM-VIF--K----- |
| <i>Arsenophonus nasoniae</i>          | 284009008                           | -----MY--L--LIMQ     | Y K-SHI-V-F--K-----  |                     |
| <i>Cellvibrio japonicus</i>           | 192361143                           | -Q---VK-----RLR-D    | Y PQSPI-V-F--K-----  |                     |
| <i>Chromohalobacter salexigens</i>    | 92112681                            | -N---VK--L--K-LI-Q   | Y PQSPM-V-F--K-----  |                     |
| <i>Citrobacter rodentium</i>          | 283787470                           | -----MY--L--LIMQ     | Y Q-THA-V-F--K-----  |                     |
| <i>Congregibacter litoralis</i>       | 88705360                            | -AA---VK--I--I-RLQ-D | Y PESTI-V-F--K-----  |                     |
| <i>Cronobacter sakazakii</i>          | 156936143                           | -----MY--L--LILQ     | Y Q-THA-V-F--K-----  |                     |
| <i>Dickeya dadantii</i>               | 307128781                           | -----MY--L--L-QQ     | Y H-SH--V-F--K-----  |                     |
| <i>Edwardsiella tarda</i>             | 269140843                           | -----MY--L--L-MQ     | Y Q-SH--V-F--K-----  |                     |
| <i>Enterobacter cancerogenus</i>      | 261342936                           | -----MY--L--LILQ     | Y Q-THA-V-F--K-----  |                     |
| <i>Erwinia tasmaniensis</i>           | 188532189                           | -----MY--L--L-LQ     | Y K-SH--V-F--K-----  |                     |
| <i>Escherichia coli</i>               | 300925951                           | -----MY--L--LIMQ     | Y K-THA-V-F--K-----  |                     |
| <i>Grimontia hollisae</i>             | 262273193                           | -----VY-----LV-Q     | Y PQSH--VIF--K-----  |                     |
| <i>Haemophilus ducreyi</i>            | 33152330                            | -----MY--L--LVNQ     | V N-SHI-V-F--K-----  |                     |
| <i>Halorhodospira halophila</i>       | 121999199                           | -----Y-----HKL-A-    | E PE-RF-V-F-----     |                     |
| <i>Idiomarina loihiensis</i>          | 56459137                            | -----IY-----L--R     | Y K-SHM-V-F--K----S  |                     |
| <i>Mannheimia haemolytica</i>         | 254360483                           | -----MY--L--K-LISQ   | V N-SHI-V-F--K-----  |                     |
| <i>Methylococcus capsulatus</i>       | 53803295                            | -----VY--I--KL-QT    | Y DG-HI-V-F--RN---   |                     |
| <i>Pasteurella dagmatis</i>           | 260912940                           | N---MY--L--K-LISQ    | V Q-SHI-V-F--K-----  |                     |
| <i>Pectobacterium wasabiae</i>        | 261823708                           | --A---MY--L--L-QQ    | Y S-SH--V-F--K-----  |                     |
| <i>Photobacterium profundum</i>       | 90414265                            | -----VY-----L-RQ     | F STEHI-VIF--K-----  |                     |
| <i>Photorhabdus asymbiotica</i>       | 253987782                           | -----MY--L--LVMQ     | Y K-SH--V-F--K-----  |                     |
| <i>Proteus penneri</i>                | 226327657                           | -----MY--L--LIIQ     | Y K-SH--V-F--K-----  |                     |
| <i>Providencia alcalifaciens</i>      | 212711548                           | -----MY--L--LIMQ     | Y T-SH--V-F--K-----  |                     |
| <i>Rickettsiella grylli</i>           | 160872753                           | -----IY--IS--KLM--   | N D-E-IVV-F--K----E  |                     |
| <i>Saccharophagus degradans</i>       | 90019722                            | -Q---VR-----KLA-D    | Y PESPI-VIF--K-----  |                     |
| <i>Salmonella enterica</i>            | 161505500                           | -----MY--L--LIMQ     | Y Q-THA-V-F--K-----  |                     |
| <i>Serratia proteamaculans</i>        | 157373118                           | -----MY--L--L-LQ     | Y Q-SH--V-F--K-----  |                     |
| <i>Shewanella oneidensis</i>          | 24376141                            | --A---VY-----L-SR    | Y Q-SHI-V-F--K----N  |                     |
| <i>Shigella dysenteriae</i>           | 194433216                           | -----MY--L--LIMQ     | Y K-THA-V-F--K-----  |                     |
| <i>Sodalis glossinidius</i>           | 85060213                            | -----MY--L--K-L-VQ   | Y --SH--V-F--K-----  |                     |
| <i>Teredinibacter turnerae</i>        | 254784333                           | -Q---IK-----RLE-D    | Y PESPI-V-F--K-----  |                     |
| <i>Xenorhabdus bovienii</i>           | 290477056                           | -----MY--L--LIIQ     | Y K-SH--V-F--K-----  |                     |
| <i>Yersinia pestis</i>                | 262364150                           | -----MY--L--L-LQ     | Y --SH--V-F--K-----  |                     |
| <i>Rickettsia canadensis</i> str. McK | 157804146                           | -K-V---Y-FTS--LKL-SD | F K-KH--V-F-SG--N--H |                     |
| <i>Anaplasma marginale</i> str. Missi | 254995381                           | -A-I-GVY-FI-I-LKH-LT | H NAD-I-V-F-TGS-N--H |                     |
| <i>Candidatus Puniceispirillum</i>    | 294084835                           | -T-VN-VY-FTS--MKLVDD | M M-DH--V-F-TSRQ---S |                     |
| <i>Achromobacter xylosoxidans</i>     | 311105001                           | -----Y-----KLVSD     | H KAE-A-CIF--R-----  |                     |
| <i>Nitrosomonas europaea</i>          | 30249439                            | N---IY--L--RLH--     | Y --D-S-C-F--K-----  |                     |
| <i>Achromobacter xylosoxidans</i>     | 317402839                           | -----Y-----KLVSD     | Y KAE-A-CIF--R-----  |                     |
| <i>Bordetella petrii</i>              | 163857439                           | -----Y-----KLVSD     | H KAD-A-CIF--R-----  |                     |
| <i>Methylobacillus flagellatus</i>    | 91774714                            | -----MY--L--RLH-D    | Y PAD-S-C-F--K-----  |                     |
| <i>Bordetella bronchiseptica</i>      | 33602215                            | -----Y-----KLVQD     | H KAE-AVC-F--R-----  |                     |

Figure S11

Partial sequence alignment of a conserved region of DNA polymerase I showing a 1 aa deletion that is uniquely shared by all members of Xanthomonadales.
