# Supplementary material for: Phylogenomics and Molecular Signatures for Species from the Plant Pathogen-Containing Order Xanthomonadales
Source: PubMed Central journal article supplement (PMC3568101; doi:10.1371/journal.pone.0055216), 2013-02-08
Supplement: pone.0055216.s012.pdf [file pone.0055216.s012.pdf]

|                                      |                                     | 306                                  | 354                                  |
|--------------------------------------|-------------------------------------|--------------------------------------|--------------------------------------|
| Xanthomonadales                      | <i>Xylella fastidiosa</i>           | 28197970                             | LRTLWEQELTQMRERIHGLRAGLVARLKALGAPEFD |
|                                      | <i>Xanthomonas campestris</i>       | 21229575                             | --DV-----E-----A-----K-A-----E       |
|                                      | <i>Xanthomonas axonopodis</i>       | 21240899                             | --D-----E-----S-----EK-AT-----       |
|                                      | <i>Xanthomonas fuscans</i>          | 294625499                            | --D-----D-----S-----EK-AT-----       |
|                                      | <i>Xanthomonas oryzae</i>           | 58424233                             | --DV-----E-----A-----EK-AT-----E     |
|                                      | <i>Xanthomonas albilineans</i>      | 285016839                            | --AM-----E-----A---M-QK-A-----G      |
|                                      | <i>Xanthomonas vesicatoria</i>      | 325918790                            | --DV-----E-----A-----EK-AT-----A     |
|                                      | <i>Xanthomonas perforans</i>        | 325926773                            | --D-----E-----S-----EK-AT-----       |
|                                      | <i>Xanthomonas gardneri</i>         | 325920984                            | --D-----E-----A-----K-AT-----        |
|                                      | <i>Rhodanobacter</i> sp. 2APBS1     | 352086152                            | --AR--E--GG--G---AM---F-EK-A---D-G   |
|                                      | <i>Pseudoxanthomonas suwonensis</i> | 319785658                            | --G---D--R-----A-----K-AEQ-R---A     |
|                                      | <i>Pseudoxanthomonas spadix</i>     | 357415998                            | --AD--T---A-----A-----QK-ADA--GD-S   |
|                                      | <i>Stenotrophomonas maltophilia</i> | 194363799                            | --AM-----E-----A--Q--EK-A-A---Q-G    |
|                                      | <i>Stenotrophomonas</i> sp. SKA14   | 254524792                            | --AM-----E-----A--Q--EK-A-A---Q-G    |
|                                      | <i>Aliivibrio salmonicida</i>       | 209695181                            | --E---VQE--A--QEM-TLF-TT--EQ-VDANF   |
|                                      | <i>Azotobacter vinelandii</i>       | 226944117                            | --A---S--AE--G--QSM-QAM-EQ-A-Q--KRDF |
|                                      | <i>Chromohalobacter salexigens</i>  | 92113446                             | -A-V-RE---E-D-N--RDF-EA--PY-LD-RF    |
|                                      | <i>Citrobacter koseri</i>           | 157146380                            | --AI-----D--Q--QRM-LLF-NT-QEK--DRDF  |
|                                      | <i>Cronobacter turicensis</i>       | 260597328                            | --M-----D--Q--QRM-QLF-NT-AEK--NRDF   |
|                                      | <i>Dickeya dadantii</i>             | 307131493                            | --NI-----A---QRM-HLF-ST-QEK--NQDF    |
| <i>Edwardsiella tarda</i>            | 294635623                           | --M-----D--Q--QRM-QLF-NT-QEK--EQDF   |                                      |
| <i>Erwinia billingiae</i>            | 300716099                           | --AI-----AD-Q--RM-QLF-NT-QEK--KGDF   |                                      |
| <i>Escherichia albertii</i>          | 170769330                           | --AI-----D--Q--QRM-QLF-NT-QEK--SRDF  |                                      |
| <i>Escherichia coli</i>              | 297520301                           | --AI-----D--Q--QRM-QLF-NT-QEK--NRDF  |                                      |
| <i>Klebsiella pneumoniae</i>         | 262040972                           | --AI-----D--Q--QRM-LLF-NT-QEK--SRDF  |                                      |
| <i>Klebsiella variicola</i>          | 288936274                           | --AI-----D--Q--QRM-LLF-NT-QEK--SRDF  |                                      |
| <i>Marinomonas</i> sp. MED121        | 87121047                            | --S---M--ES--K---EM-SLF-ST-R-N-VEQDF |                                      |
| <i>Pantoea</i> sp. At-9b             | 258636143                           | --I-----D--Q--QRM-QLF-NT-ASS--EQDF   |                                      |
| <i>Photobacterium damsela</i>        | 269102889                           | --AE---VAE--D--QEM-TLF-DT--S--IDRDF  |                                      |
| <i>Photorhabdus asymbiotica</i>      | 253990243                           | -KAV-----T-----QRM-QLF-NT-QEK--NQDF  |                                      |
| <i>Pseudoalteromonas tunicata</i>    | 88860457                            | -TA--H--AE--D--N--TLI-DS-N-Q-IDQDF   |                                      |
| <i>Pseudomonas aeruginosa</i>        | 20559868                            | --A-----GE--D--RDM-LAM-EQ-A-H--KRDF  |                                      |
| <i>Reinekea</i> sp. MED297           | 88797991                            | -KAK-I--VAD--QH-----KLM-ET--D--VEKDF |                                      |
| <i>Salmonella enterica</i>           | 161503873                           | --AI-----D--Q--QRM-QLF-NT-QEK--NRDF  |                                      |
| <i>Serratia odorifera</i>            | 270261211                           | --A-----D--Q--RM-QLF-NT-QEK--EQDF    |                                      |
| <i>Shewanella woodyi</i>             | 170726758                           | -KA--R--KE-----AKM-TLF-ET--SE-VTQDF  |                                      |
| <i>Shigella flexneri</i>             | 281600288                           | --AI-----D--Q--QRM-QLF-NT-QEK--NRDF  |                                      |
| <i>Sodalis glossinidius</i>          | 85060109                            | -N--RE-VAA--Q--LAM-HS---A--VALPDHQF  |                                      |
| <i>Vibrio alginolyticus</i>          | 91227221                            | M-AE--A-VAE--D--QEM-ELF--T---E-VDADF |                                      |
| <i>Vibrio cholerae</i>               | 229515668                           | --AE--A-VAE-----QEM-VLF-NT--EV-VDADF |                                      |
| <i>Yersinia pestis</i>               | 108806701                           | --AI-----D--Q--QRM-QLF-NT-QEK--QQDF  |                                      |
| <i>Yersinia ruckeri</i>              | 238754324                           | --AI-----D--Q--RM-QLF-KT-QEK--KQDF   |                                      |
| <i>Beijerinckia indica</i>           | 182680498                           | -TA--HD--AL--D--KAM-E--AE--RVQVPRDF  |                                      |
| <i>Maritimibacter alkaliphilus</i>   | 84684244                            | --E--T--EEV-NTML---TQ-AEA-Q-RTGSDRF  |                                      |
| <i>Sagittula stellata</i>            | 126730888                           | --AD--E-VREI--GVL---EQ-A-E-QR-TGSDRF |                                      |
| <i>Methyloversatilis universalis</i> | 334129888                           | --SM--E--GE-----RAM-T--DK-S-R-VARDF  |                                      |
| <i>Burkholderia xenovorans</i>       | 91782671                            | --AT--T--AE--D--RAM-N---E---S-VDRDF  |                                      |
| <i>Verminephrobacter eiseniae</i>    | 121609327                           | --A--R--A--L--KAM-QQ---G--A-VRQDM    |                                      |
|                                      |                                     |                                      | FIQRQAGMFSYSG                        |

Figure S12

Partial sequence alignment of a conserved region of aromatic amino acid aminotransferase showing a 1 aa deletion that is uniquely shared by all Xanthomonadales.
