# Supplementary material for: Phylogenomics and Molecular Signatures for Species from the Plant Pathogen-Containing Order Xanthomonadales
Source: PubMed Central journal article supplement (PMC3568101; doi:10.1371/journal.pone.0055216), 2013-02-08
Supplement: pone.0055216.s013.pdf [file pone.0055216.s013.pdf]

|   |                               | 44        | 81                                       |
|---|-------------------------------|-----------|------------------------------------------|
|   | Stenotrophomonas maltophilia  | 194363780 | LTGTDLEVMVSRIAVED A QDGETTIPARKLFEIIRAL  |
|   | Xanthomonas albilineans       | 285016823 | -----D- -----V---                        |
|   | Xanthomonas campestris        | 21229480  | -----I--TM--- -----D-L---                |
|   | Xanthomonas oryzae            | 166709897 | -----I--TM--- -----D-L---                |
|   | Xanthomonas fuscans           | 294665123 | -----I--TL--- -----D-L---                |
|   | Xanthomonas axonopodis        | 21240776  | -----I--TL--- -----D-L---                |
|   | Xanthomonas vesicatoria       | 325915700 | -----I--TM--- -----D-L---                |
|   | Xanthomonas gardneri          | 325922760 | -----I--TM--- -----D-L---                |
|   | Pseudoxanthomonas suwonensis  | 319785622 | -----IA-A---- -V---I-----V---            |
|   | Pseudoxanthomonas spadix      | 357415873 | -----IA-S---- -----V---                  |
|   | Rhodanobacter sp. 2APBS1      | 352080695 | -----ATTEA-K LV---V-----D-V---           |
|   | Xylella fastidiosa Dixon      | 71275533  | -----I-KTII-- -ES--I-----IY--V---        |
|   | Xylella fastidiosa 9a5c       | 15836607  | -----I-KTII-- -ES--I-----IY--V---        |
|   | Xylella fastidiosa Temecula1  | 28197947  | -----I-KTKI-- PES--I-----IY--V---        |
|   | Marinomonas sp. MWYL1         | 152994045 | ---S-----L-GHVPDE CEE-RI-V-----MD-CKS-   |
| → | Thioalkalivibrio sp. HL-EbGR7 | 220933195 | V-----L-AEASEVS -SP--A-V-----LD-C---     |
|   | Aeromonas hydrophila          | 117619320 | -----IGQVYLNS D S---R-V-----LD-C-G-      |
|   | Alteromonas macleodii         | 196154828 | -----LI-SVKL-G E FTE--I-V--K---D---GI    |
|   | Idiomarina loihiensis         | 56459114  | -----L-AVPL-S A DM-AAV-V--K-FLD-C-S-     |
|   | Marinobacter aquaeolei        | 120552946 | ---NM---L-A-V-PVH V D-P-RI-V-----AD-C--- |
|   | Psychromonas ingrahamii       | 119947309 | -----LIAV--L-N P SEN-VI-V-----LD-C-G-    |
|   | Shewanella amazonensis        | 119773156 | M-----L-GEAT-HG D V-E-R--V--K--LD-VKS-   |
|   | Teredinibacter turnerae       | 254784275 | -----IIG-VQL-S A PGN--I-V--K-FLD-C-S-    |
|   | Azotobacter vinelandii        | 226942172 | -----L-G-VPL-E N -EP--I-V-----MD-CKS-    |
|   | Cellvibrio japonicus          | 192362292 | -----IIG-LTL-Q A G-S--I-V-----VD-C-S-    |
|   | Pseudomonas aeruginosa        | 15595200  | -----L-G-VVL-- A -EP--I-V-----MD-CKS-    |
|   | Arsenophonus nasoniae         | 284007064 | -----AKVTLTQ P GES-SI-V-----F-D-W-G-     |
|   | Citrobacter koseri            | 157144343 | -----M--A-V-LIQ P HEP-A-V-----F-D-C-G-   |
|   | Cronobacter sakazakii         | 156936081 | -----M--A-V-LVQ P HEP-A-V-----F-D-C-G-   |
|   | Dickeya zeae                  | 251787654 | -----M--AHL-LTQ P HEP-A-V-----F-D-C-G-   |
|   | Edwardsiella ictaluri         | 238917985 | -----M--A-VPLVQ P HEA-A-V-----FLD-C-G-   |
|   | Enterobacter cloacae          | 296100373 | -----M--IA-VTLTQ P HDA-A-V-----F-D-C-G-  |
|   | Erwinia amylovora             | 292490135 | -----M--A-V-LAQ D H-P-A-V-----F-D-C-G-   |
|   | Escherichia coli              | 284923784 | -----M--A-V-LVQ S HEP-A-V-----F-D-C-G-   |
|   | Klebsiella pneumoniae         | 152972608 | -----M--A-V-LVQ P HEA-A-V-----F-D-C-G-   |
|   | Morganella morganii           | 88697472  | -----M--MAAVPLDQ P HEN---V-----FLD-W-G-  |
|   | Pantoea ananatis              | 291615642 | -----M--A-V-LTQ P HET-A-V-----FLD-C-G-   |
|   | Pectobacterium carotovorum    | 253686411 | -----M--AKV-LTQ P HEP-A-V-----D-C-G-     |
|   | Photorhabdus asymbiotica      | 253987485 | -----M--MA-VTLSL P HEE-A-V-----F-D-W-G-  |
|   | Proteus mirabilis             | 197286951 | -----M--MA-VLSLQ S HEI-A-V-----F-D-W-G-  |
|   | Providencia rettgeri          | 268593489 | -----M--MANV-LTG E HEI-A-V-----F-D-W-G-  |
|   | Salmonella enterica           | 16762488  | -----M--A-VTSLQ P HEP-A-V-----F-D-C-G-   |
|   | Serratia odorifera            | 270264120 | -----M--A-V-LSQ P HEA-A-V-----F-D-C-G-   |
|   | Shigella flexneri             | 30065009  | -----M--A-V-LVQ P HEP-A-V-----F-D-C-G-   |
|   | Sodalis glossinidius          | 85057980  | -----M--AQV-LSA A HEP-A-V-----F-D-C-G-   |
|   | Xenorhabdus nematophila       | 300721091 | -----T--KA-VTLTQ P HEQ-A-----F-D-W-G-    |
|   | Yersinia aldovae              | 238759585 | -----M--A-V-LSH P HEQ-A-V-----F-D-W-G-   |
|   | Yersinia pestis               | 22127980  | -----M--ACV-LSQ S HEP-A-V-----F-D-W-G-   |
|   | Alcanivorax borkumensis       | 110832863 | M-----L-L-A-LPL-G E LEP---V-----VD-GKS-  |
|   | Oceanospirillum sp. MED92     | 89092265  | M-----L-G-VTLDE P -EA-SV-V-----MD-CKS-   |
|   | Vibrio furnissii              | 260771048 | M-A-----L--VTL-G D FEA-T--V-----FLD-C-G- |

Figure S13

Partial sequence alignment of a conserved region of DNA polymerase III subunit beta showing a 1 aa deletion that is present in all Xanthomonadales. The CSI has also been found to be shared by *Marinomonas sp. MWYL1* and *Thioalkalivibrio sp. HL-EbGR7*.
