# Supplementary material for: Phylogenomics and Molecular Signatures for Species from the Plant Pathogen-Containing Order Xanthomonadales
Source: PubMed Central journal article supplement (PMC3568101; doi:10.1371/journal.pone.0055216), 2013-02-08
Supplement: pone.0055216.s014.pdf [file pone.0055216.s014.pdf]

|                             |                              | 317                                      | 358                                           |
|-----------------------------|------------------------------|------------------------------------------|-----------------------------------------------|
| Xanthomonadales             | Stenotrophomonas maltophilia | 190573490                                | PMVVGYRVNELTYRLVKA LG LIKVDRLFALPNILAGQDLAPEL |
|                             | Stenotrophomonas sp. SKA14   | 254521713                                | -----K-AP---I---L---N-Y-----ND-----           |
|                             | Xanthomonas albilineans      | 285018803                                | -----K-AP---I---L---N-Y-----ND-----           |
|                             | Xanthomonas oryzae           | 166712745                                | -----K-AP---I---L---N-Y-----ND-----           |
|                             | Xanthomonas axonopodis       | 21242161                                 | -----K-AP---I---L---N-Y-----ND-----           |
|                             | Xanthomonas campestris       | 289662894                                | -----K-AP---I---L---N-Y-----ND-----           |
|                             | Xanthomonas fuscans          | 294625961                                | -----K-AP---I---L---N-Y-----ND-----           |
|                             | Xanthomonas vesicatoria      | 325916628                                | -----K-AP---I---T---N-Y-----ND-----           |
|                             | Xanthomonas gardneri         | 325923965                                | -----K-AP---I---T---N-Y-----ND-----           |
|                             | Pseudoxanthomonas spadix     | 357417819                                | -----AP-SAWIART---E---V-----                  |
|                             | Pseudoxanthomonas suwonensis | 319786396                                | -----AP-----Y-----K-----                      |
|                             | Xylella fastidiosa           | 15837644                                 | ---A-K-AP---I---T-K-L-IN-----E-----           |
|                             | Rhodanobacter sp. 2APBS1     | 352086326                                | -----AP-S-IAL-K-ML-T-IY-----                  |
|                             | Cardiobacterium hominis      | 258546185                                | ---A---HPVSAAIAR-R-L-IN-S---L---A-IV--C       |
|                             | Allochromatium vinosum       | 288941771                                | ---T--LHP--HV--W-K-V--PYV-MA-L---RA---F       |
|                             | Alteromonadales bacterium    | 119471148                                | ---KIKP-S-WIF-T-F-TFNIKY-S---L---DEE-V--F     |
|                             | Acinetobacter radioresistens | 255318109                                | ---TF-KL-W---IIA-L-V-IPYYS---I--KKVIA--       |
|                             | Actinobacillus minor         | 257464952                                | -----MKPM--W-A-K-V-T-YIS---L--NEP-V--         |
|                             | Actinobacillus succinogenes  | 152979548                                | -----MKPF--F-A-R-V-TNYIS---L--NEM-V--M        |
|                             | Aeromonas hydrophila         | 117617831                                | -----KLKPF-S-W-AQR-V-TEFVS---L---RM-V---      |
| Aeromonas salmonicida       | 145300048                    | -----KLKPF-S-W-AQR-V-TAYVS---L--D-M-V--- |                                               |
| Aggregatibacter aphrophilus | 251793244                    | -----MKPF--F-A-R-V-TKYVS---L--DEM-V---   |                                               |
| Citrobacter rodentium       | 283783966                    | -----MKPF-FW-A-R-V-T-YVS---L---RE-VK--   |                                               |
| Cronobacter turicensis      | 260596602                    | -----MKPF-FW-A-R-V-TEFVS---L---RE-VK--   |                                               |
| Dickeya zeae Ech1591        | 251790732                    | -----MKPF--W-A-R-V-TPWVS---L---RE-VS--   |                                               |
| Edwardsiella ictaluri       | 238918788                    | ---A--MKPF-FW-AQR-V-TEFVS---L---RE-V---  |                                               |
| Enterobacter cancerogenus   | 261338820                    | -----MKPF-FW-A-R-V-T-YVS---L---RE-VK--   |                                               |
| Erwinia amylovora           | 292489214                    | -----MKPF-FW-A-R-V-T-YVS---L---RE-V---   |                                               |
| Escherichia coli            | 170681777                    | -----MKPF-FW-A-R-V-TEYVS---L---RE-VK--   |                                               |
| Grimontia hollisae          | 262276514                    | -----K--AI-AWIARR-ML-TEFVS-----RE-V--R   |                                               |
| Haemophilus influenzae      | 260581886                    | -----MKP--F-A-R-V-T-YIS---L--NEM-V--M    |                                               |
| Hahella chejuensis          | 83647903                     | ---A-KLAT-S-WIMRR-L-AKYIS---L--DKA-V---  |                                               |
| Kangiella korensis          | 256823114                    | -T--A-K-GGFS-QIF-R-LII-T--I--L--KKP-I--- |                                               |
| Klebsiella pneumoniae       | 206580293                    | -----MKPF-FW-A-R-V-T-YVS---L---RE-VK--   |                                               |
| Mannheimia haemolytica      | 254361154                    | -----MKP--W-A-K-V-T-YIS---L--QAP-V---    |                                               |
| Pantoea ananatis            | 291616359                    | -----MKPF-FW-A-R-V-T-YVS---L---RE-VK--   |                                               |
| Pasteurella dagmatis        | 260913167                    | -----MKST--F-A-R-V-T-YIS---L--NEM-V--M   |                                               |
| Providencia rettgeri        | 268590519                    | -----MKPF-FW-A-R-V-TPYVS---L---KEIVK--   |                                               |
| Psychromonas ingrahamii     | 119946584                    | ---A-K--L--VIA--V--KYTS---LI-DKEIVK--    |                                               |
| Saccharophagus degradans    | 90022229                     | ---IA-HMAAFS-W-LSK-V-SKFVG---L--DKE-V--- |                                               |
| Salmonella enterica         | 56412502                     | -----MKSF-FW-A-R-V-TEYVS---L---RE-VK--   |                                               |
| Serratia odorifera          | 270264807                    | -----MKPF-FW-AQR-V-TPYVS---L---REIVT--   |                                               |
| Shewanella denitrificans    | 91792924                     | ---A--SPI--AIA-R-MMSISHYS---L---TE-V---  |                                               |
| Shigella dysenteriae        | 82775572                     | -----MKPF-FW-A-L-V-T-YVS---L---RE-VK--   |                                               |
| Vibrio cholerae             | 153831006                    | -----AF-AF-A-R-L-TPYVS-----EE-VK--       |                                               |

Figure S14

Partial sequence alignment of a conserved region of lipid-A-disaccharide synthase a 2 aa insert that is present in all Xanthomonadales. The CSI has also been found to be shared by *Cardiobacterium hominis*, *Allochromatium vinosum* and *Alteromonadales bacterium*.
