# Supplementary material for: Phylogenomics and Molecular Signatures for Species from the Plant Pathogen-Containing Order Xanthomonadales
Source: PubMed Central journal article supplement (PMC3568101; doi:10.1371/journal.pone.0055216), 2013-02-08
Supplement: pone.0055216.s015.pdf [file pone.0055216.s015.pdf]

|                            |                              |                     |                      |                                   |                                     |
|----------------------------|------------------------------|---------------------|----------------------|-----------------------------------|-------------------------------------|
|                            | Xanthomonas oryzae           | 166711938           | ESLQKALRGLETGKIGLDPT | G                                 | LDLSSIEDDIAALKRELKAPGPERLFYVADAFRAG |
|                            | Xanthomonas fuscans          | 294666705           | -----                | -                                 | -----T-----                         |
|                            | Xanthomonas campestris       | 289668839           | -----S-----          | -                                 | -----T-----                         |
|                            | Xanthomonas axonopodis       | 161485715           | -----                | -                                 | -----T-----                         |
|                            | Xanthomonas albilineans      | 285018123           | -----                | -                                 | ---RN---L---RH-----                 |
|                            | Xanthomonas gardneri         | 325922458           | -----                | -                                 | -----                               |
| Xanthomonadales            | Xanthomonas perforans        | 325925176           | -----                | -                                 | -----T-----                         |
|                            | Xanthomonas vesicatoria      | 325915492           | -----                | -                                 | ---G-E-M-----                       |
|                            | Pseudoxanthomonas spadix     | 357417417           | -----V-----          | -                                 | ---G---M-S-R-----G-----             |
|                            | Pseudoxanthomonas suwonensis | 319787363           | --V-----V-F--        | -                                 | ---AD-E-L-T-R-----                  |
|                            | Rhodanobacter sp. 2APBS1     | 352082139           | -----I--T--N--       | -                                 | ---GTD-GL-V---RE-R-D-V-HL-----      |
|                            | Stenotrophomonas sp. SKA14   | 254524347           | --V-----V-F--        | -                                 | ---AN-E-LQT-R-----F-----            |
|                            | Stenotrophomonas maltophilia | 194365589           | --M-----V-F--        | -                                 | ---TN---LQT-R-----F-----            |
|                            | Xylella fastidiosa           | 15837709            | -----V-----V-E--     | -                                 | -----LVV-----A-----                 |
|                            | Marinobacter sp. ELB17       | 126664879           | -----V-SD-F-EM       | L                                 | SEFD--ESRQT-T---NV--A--IW-IG-----   |
|                            | Aeromonas hydrophila         | 117618944           | ---H-----T-F--M      | -                                 | V--NAP-SLTRIRH--QDA-A--I--I-----    |
| Aeromonas salmonicida      | 145298639                    | ---H---S---T-F--M   | -                    | V--NAP-SLTRIRH--QDA-CD-IW-I-----  |                                     |
| Arsenophonus nasoniae      | 284006380                    | --M-----VAAT-F--K   | -                    | V--DEF-SLTKIR---DA-A--IW-I-----   |                                     |
| Azotobacter vinelandii     | 226946317                    | --V-----V-VS-F--K   | -                    | --PGNPEAGSI---TV--A--IW-----      |                                     |
| Candidatus Hamiltonella    | 238897353                    | -----V-AT---K       | -                    | VS-NDPEA-TSIR---DA-G--IW-I-----   |                                     |
| Candidatus Regiella        | 304414251                    | -----V-AT---K       | -                    | VN-DDPQALSKIR---EA-A--IW-I-----   |                                     |
| Cellvibrio japonicus       | 192362421                    | -----V-SA-FESK      | -                    | V-YTT-EGA-KVR---TTA-A--IW-G---M-  |                                     |
| Citrobacter youngae        | 283835095                    | -----V-AT-F--K      | -                    | VS-DDPEALTKIR---DA-A--IW-I-----   |                                     |
| Cronobacter sakazakii      | 156935438                    | --M-----V-AT-F--K   | -                    | VS-DDPEALTKIR---DA-A--IW-I-----   |                                     |
| Dickeya dadantii           | 307132640                    | -----V-AT-F--K      | -                    | V--DDPEALTKIR---DA-GD-IW-L-----   |                                     |
| Edwardsiella ictaluri      | 238918633                    | -----V-AS-F--K      | -                    | VN-DDPQALTKIR---DA-A--IW-I-----   |                                     |
| Enterobacter cancerogenus  | 261338962                    | -----V-AT-F--K      | -                    | VS-DDPEALTKIR---DA-A--IW-I-----   |                                     |
| Erwinia tasmaniensis       | 188532866                    | --M-----V-AN-F--K   | -                    | V--NDPEALTTIR---DA-SD-IW-I-----   |                                     |
| Escherichia coli           | 110640245                    | -----V-AT-F--K      | -                    | VS-DDPEALTKIR---DA-A--IW-I-----   |                                     |
| Idiomarina loihiensis      | 56460088                     | --M-----L-AS-F--I   | -                    | V--EAK-ARSKVI---E--A--IW-I---L-   |                                     |
| Klebsiella pneumoniae      | 206579070                    | -----V-AT-F--K      | -                    | VS-DDPEALTKIR---DA-A--IW-I-----   |                                     |
| Marinobacter algicola      | 149375766                    | -----M---V-SD-FEEK  | -                    | V--NTT-GQET-TQ--NV--A--W-IG-----  |                                     |
| Marinomonas sp. MWYL1      | 152998030                    | -----V-SD-FN-Q      | -                    | --FAE-NSKEK-AY--QS--SD-IW-IG---S- |                                     |
| Moritella sp. PE36         | 149908713                    | --M---I---I--N-F--E | -                    | VN-ND-SAA-KIRQ--TEA-A--I--I--Y-I- |                                     |
| Nitrosococcus oceani       | 77166030                     | -----S---TD-FNEK    | -                    | V--AA--VVET-RYQ-RV-SAD-IY-L-----  |                                     |
| Oceanospirillum sp. MED92  | 89095225                     | -----V-AT-F--I      | -                    | I-IT--ARSTIV--M-E--A--IW-LG---M-  |                                     |
| Pantoea ananatis           | 291616228                    | --V-----V-AN-F--K   | -                    | VH-DDAEALTRIR---DA-SD-IW-I-----   |                                     |
| Pectobacterium carotovorum | 227327742                    | -----V-AT-F--K      | -                    | V--DDPEALTKIR---DA-A--IW-I-----   |                                     |
| Photobacterium asymbiotica | 253988043                    | -----V-AT-F--K      | -                    | V--DDPEALTKIR---DA-G--IW-I-----   |                                     |
| Proteus mirabilis          | 227358194                    | --M-----V-AT-F--K   | -                    | VN-DDPEALTKIR---EA-SD-IW-I-----   |                                     |
| Providencia stuartii       | 183601001                    | --M-----F-AT-F--K   | -                    | VSQDDPEALTRIR---DA-A--IW-I-----   |                                     |
| Pseudomonas aeruginosa     | 15599950                     | --V-----V-AT-F--K   | -                    | ---NDPEADSI---TV-SA-VW-----       |                                     |
| Saccharophagus degradans   | 90022373                     | -----V-SA-FE-R      | -                    | V--TGDNALELIR-D-ST--A--IW-----    |                                     |
| Salmonella enterica        | 161504813                    | -----V-AT-F--K      | -                    | VS-DDPEALTKIR---DA-A--IW-I-----   |                                     |
| Serratia odorifera         | 270263912                    | -----V-AT-F--K      | -                    | VN-DDPEALTKIR---DA-CD-IW-I-----   |                                     |
| Serratia proteamaculans    | 157368959                    | -----V-AT-F--K      | -                    | VS-DDPEALTKIR---DA-SD-IW-I-----   |                                     |
| Shewanella amazonensis     | 119775635                    | --V-----VSRN-F--I   | -                    | V--DA-ALQKIRH---E--AD-IW-IG-----  |                                     |
| Shigella sonnei            | 74310651                     | -----V-AT-F--K      | -                    | VS-DDPEALTKIR---DA-A--IW-I-----   |                                     |
| Sodalis glossinidius       | 85058398                     | -----V-AS-F--K      | -                    | VN-DDPEALTT-R---DA-G--IW-----     |                                     |
| Teredinibacter turnerae    | 254787220                    | -----V-SA-FE-R      | -                    | ---T-D-A-DRIRHD-AT--A--IW-IG----- |                                     |
| Vibrio shilonii            | 149190314                    | -----V-AT-F-EM      | -                    | V--DAP-ALSKIRH---EA-A--IW-I-----  |                                     |
| Xenorhabdus bovienii       | 290474746                    | --M-----V-VT-F--K   | -                    | VN-DDPQSLTKIRS---SA-A--IW-----    |                                     |
| Yersinia enterocolitica    | 123440986                    | -----V-AT-F--K      | -                    | VS-DDPEALTKIR---EA-SD-IW-I-----   |                                     |

Figure S15

Partial sequence alignment of a conserved region of carbamoyl phosphate synthase large subunit a 1 aa insert that is present in all Xanthomonadales. The CSI has also been found to be shared by *Marinobacter* sp. ELB17.
