# Supplementary material for: Phylogenomics and Molecular Signatures for Species from the Plant Pathogen-Containing Order Xanthomonadales
Source: PubMed Central journal article supplement (PMC3568101; doi:10.1371/journal.pone.0055216), 2013-02-08
Supplement: pone.0055216.s016.pdf [file pone.0055216.s016.pdf]

|                  |                              | 1285                              | 1318                                |
|------------------|------------------------------|-----------------------------------|-------------------------------------|
| Xanthomonadales  | Xanthomonas campestris       | 188992701                         | VLARVNRAPLGLRALYD N QRDKALTGLSLVHLG |
|                  | Xanthomonas fuscans          | 294627964                         | -----                               |
|                  | Xanthomonas axonopodis       | 21241899                          | -----                               |
|                  | Xylella fastidiosa           | 15837853                          | -----T----- E-G--VS-----            |
|                  | Xanthomonas perforans        | 325925285                         | -----                               |
|                  | Xanthomonas vesicatoria      | 325915165                         | ----- --A-----                      |
|                  | Pseudoxanthomonas spadix     | 357417253                         | -----G----- -D-V-SM--P----          |
|                  | Pseudoxanthomonas suwonensis | 319786934                         | ----- Q EKGRS----P--R--             |
|                  | Rhodanobacter sp. 2APBS1     | 352080521                         | -----IF-- -E-Q-LVAP-P----           |
|                  | Stenotrophomonas sp. SKA14   | 254522704                         | -----T---- -E-S--VG-----            |
|                  | Stenotrophomonas maltophilia | 194366795                         | -----T---- -E-S--VG-----            |
|                  | → Teredinibacter turnerae    | 254784961                         | --SGLK----V--N--R R DFNA-QS-YAQL--- |
|                  | Citrobacter koseri           | 157144543                         | ---QK----A--EIWE R-SQ-AS--P-LQ--    |
|                  | Cronobacter sakazakii        | 156932934                         | ---QK----A--D-WE H-AQ-GS--P--Q--    |
|                  | Cronobacter turicensis       | 260598906                         | ---QK----A--D-WE H-AQ-GG--P--Q--    |
| Other Bacteria   | Enterobacter cancerogenus    | 261340828                         | ---QK----A--EIW- RHSQ-AS--P-MQ--    |
|                  | Erwinia billingiae           | 300717957                         | ---QK----A----F- KQGQ-K-----Q--     |
|                  | Escherichia coli             | 300920676                         | ---QK----A--EIWE H-AD-AS--P-LQ--    |
|                  | Klebsiella pneumoniae        | 206580715                         | ---QK----A--EIWS RH-Q-RS--P-LQ--    |
|                  | Pantoea ananatis             | 291618417                         | ---QQ----A----E K----KS--A-MQ--     |
|                  | Photorhabdus asymbiotica     | 253988861                         | ---SQK----A--QV-E R-NQ-GN----Q--    |
|                  | Photorhabdus luminescens     | 37525326                          | ---NQK----A--QV-E R-QQ-GN----Q--    |
|                  | Proteus mirabilis            | 227356217                         | ---NQK----E--R--L E-NQ-GS--A--Q--   |
|                  | Providencia alcalifaciens    | 212710621                         | ---TQK----A--QI-G -ANN-TS--A--Q--   |
|                  | Pseudomonas entomophila      | 104783782                         | ---SQQ----A--S--- R-AD-RS--P--Q-A   |
|                  | Salmonella enterica          | 16765852                          | ---QK-----EIWE R-SQ-AS--P-MQ--      |
|                  | Serratia odorifera           | 270264736                         | ---QQQ----A--Q--E R-AD-RS--P--Q--   |
|                  | Shigella boydii              | 187733068                         | ---QK----A--EIWE H-AD-AS--P-LQ--    |
|                  | Xenorhabdus bovienii         | 290476010                         | ---SQK---SG--Q--E RHQQ-GN----Q--    |
|                  | Xenorhabdus nematophila      | 300724160                         | ---GQK---SG--Q--E RHTQ-ES----Q--    |
| Yersinia aldovae | 238758827                    | ---QQQ-S--A--Q--T RSNE-RS--P--Q-- |                                     |

**Figure S16**

Partial sequence alignment of a conserved region of putative secreted protein showing a 1 aa insert that is present in all Xanthomonadales. The CSI has also been found to be shared by *Teredinibacter turnerae*.
