# Supplementary material for: Phylogenomics and Molecular Signatures for Species from the Plant Pathogen-Containing Order Xanthomonadales
Source: PubMed Central journal article supplement (PMC3568101; doi:10.1371/journal.pone.0055216), 2013-02-08
Supplement: pone.0055216.s017.pdf [file pone.0055216.s017.pdf]

|                                |                               |                            | 211                 | 246                 |                     |
|--------------------------------|-------------------------------|----------------------------|---------------------|---------------------|---------------------|
| Xanthomonadales                | Xanthomonas fuscans           | 294627124                  | EYELQAEVEREFRAADAW  | PAYGSIVGTGSNACVLHY  |                     |
|                                | Xanthomonas axonopodis        | 21244130                   | -----               | -----               |                     |
|                                | Xanthomonas campestris        | 289662144                  | -----               | -----               |                     |
|                                | Xanthomonas oryzae            | 166713279                  | -----               | -----S-----         |                     |
|                                | Xanthomonas albilineans       | 285017584                  | --Q---I-HA---G--C   | -----S-----         |                     |
|                                | Xanthomonas vesicatoria       | 325918107                  | --A-----            | -----               |                     |
|                                | Xanthomonas gardneri          | 325922293                  | ---F-----           | -----               |                     |
|                                | Pseudoxanthomonas suwonensis  | 319788224                  | -----V-----         | ---A---A-G-G---     |                     |
|                                | Pseudoxanthomonas spadix      | 357418373                  | --Q---LM-WV---SQ--- | -----A-A-VT---      |                     |
|                                | Stenotrophomonas maltophilia  | 194367049                  | -----L--V---S--V    | ---C---A-R-G-I---   |                     |
|                                | Stenotrophomonas sp. SKA14    | 254521029                  | -----L--V---N--V    | ---C---A-R-G-I---   |                     |
|                                | Xylella fastidiosa            | 71275757                   | --V---L--V---SC     | ---T---AA-A---      |                     |
|                                | Rhodanobacter sp. 2APBS1      | 352089789                  | ---VE--LL-VV-GQG-V  | --FPP--AG-A---M--   |                     |
|                                | Thioalkalivibrio sp. HL-EbGR7 | 220935926                  | ---IE--LLY---R-GTE  | ---P---G-A-G-I---   |                     |
|                                | Other<br>γ-Proteobacteria     | Alkalilimnicola ehrlichii  | 114321689           | ---E--FLAA--R-GGE   | ---P---G-G-G----    |
|                                |                               | Alteromonas macleodii      | 239995906           | --Q-E--IHH--AM-G-R  | S---ST---S-D---I--- |
| Azotobacter vinelandii         |                               | 226946740                  | --H-E--L-Y---KGG-R  | M-----AG-R---I---   |                     |
| Candidatus Regiella            |                               | 304414301                  | --Q-EG-IQH--IQNG-R  | F---NT---S-A-G-I--- |                     |
| Citrobacter koseri             |                               | 157148448                  | --Q-EG-IHH--NRHG-R  | Y-S-NT---S-E-G-I--- |                     |
| Congregibacter litoralis       |                               | 88706374                   | -F-E--LLH--ARHG-R   | H A-P---AG-----TM-- |                     |
| Dickeya zeae                   |                               | 251791161                  | --Q-EG-IHH--NRHG-R  | Y-S-NT---S-E---I--- |                     |
| Enterobacter cloacae           |                               | 295097444                  | --Q-EG-IHH--NRHG-R  | F-S-NT--G-E-G-I---  |                     |
| Erwinia pyrifoliae             |                               | 259909571                  | --Q-EG-IQH--NRHG-R  | F-S-NT---A-E---I--- |                     |
| Escherichia coli               |                               | 110643056                  | --H-EG-IHH--NRHG-R  | Y-S-NT---S-E-G-I--- |                     |
| Klebsiella pneumoniae          |                               | 206579369                  | --Q-EG-ILH--NRHG-R  | F-S-NT--G-E-G-I---  |                     |
| Pantoea ananatis               |                               | 291618745                  | --H-EG-IHH--NRHG-R  | F-S-NT---S-E-G-I--- |                     |
| Pectobacterium wasabiae        |                               | 261819870                  | --Q-EG-IHH--TRHG-R  | Y-S-NT---S-D---I--- |                     |
| Photorhabdus asymbiotica       |                               | 253988637                  | --Q-E--IHH--THQG-R  | Y---NT-I-S-E-S-I--- |                     |
| Photorhabdus luminescens       |                               | 37527469                   | --Q-E--IHH--THQG-R  | Y---NT---S-E-S-I--- |                     |
| Proteus mirabilis              |                               | 197285875                  | --Q--G-I-H--ISHG-R  | F-S-N---S-E-G-I---  |                     |
| Providencia stuartii           |                               | 183599852                  | --Q-CG-L-H--TRHG-R  | Y-S-N---S-E---I---  |                     |
| Pseudomonas aeruginosa         |                               | 152986578                  | --H-E--L-Y---KGG-K  | M-----AA-R---I---   |                     |
| Psychromonas ingrahamii        |                               | 119944379                  | --Q-E--IRY--AQQG-T  | N V-N---AG-HH--I--- |                     |
| Salmonella enterica            |                               | 16761839                   | --Q-EG-IHH--NRHG-R  | Y-S-NT---S-E-G-I--- |                     |
| Serratia odorifera             |                               | 270264936                  | --Q-E--ILH--TRLG-R  | Y-S-NT--G-E---I---  |                     |
| Shigella sonnei                |                               | 74313466                   | --H-EG-IHH--NRHG-R  | Y-S-NT--S-E-G-I---  |                     |
| Sodalis glossinidius           |                               | 85059983                   | --Q-EG-IQH--NRHG-R  | F-S-ST-A-S-E-G-I--- |                     |
| Xenorhabdus bovienii           |                               | 290476416                  | --Q-E--IHH--TRQG-R  | Y---NT---A-E---I--- |                     |
| Yersinia pestis                |                               | 22127173                   | --Q-EG-ILH--TRHG-R  | Y---NT--G-E-G-I---  |                     |
| β-Proteobacteria               |                               | Oxalobacteraceae bacterium | 329903498           | --QID--LLH--NHGSD   | F---T---A-A-----    |
|                                | Methyloversatilis universalis | 334133010                  | ---IE--ILH--R-GSE   | A-----AG-A-----     |                     |
|                                | Limnobacter sp. MED105        | 149927953                  | -F-VE--LLYQ--KNGSE  | A-----AS-A-----     |                     |
|                                | Herbaspirillum seropedicae    | 300310037                  | --H-E--LLH--RNGSQ   | Y-----A-A-S-----    |                     |
|                                | Burkholderia glumae           | 238026252                  | ---IE--LLH--RHG-A   | G-----AA-A-----     |                     |
| α-Proteobacteria               | Burkholderia gladioli         | 330815566                  | ---IE--LLH--RHGSA   | G-----AA-A-----     |                     |
|                                | Chromobacterium violaceum     | 34498577                   | --Q-E--LLHV-VGHG-R  | Q---E---AA-A---T--- |                     |
|                                | Sphingobium chlorophenolicum  | 334345114                  | -RQ-K-IL-DG---GGGE  | G L-D---A-R--AS---  |                     |
|                                | Sphingobium japonicum         | 294011039                  | -RQ-K-IL-DG---GGGE  | G L-D---A-R--AS---  |                     |
| Novosphingobium aromaticivoran | 87198178                      | -RQ-T-VL-DG--QGGGE         | G LS-D---A-R--AS--- |                     |                     |

Figure S17

Partial sequence alignment of a conserved region of aminopeptidase P showing a 1 aa deletion that is present in all Xanthomonadales. The CSI has also been found to be shared by *Thioalkalivibrio* sp. HL-EbGR7 and *Alkalilimnicola ehrlichii*.
