# Supplementary material for: Phylogenomics and Molecular Signatures for Species from the Plant Pathogen-Containing Order Xanthomonadales
Source: PubMed Central journal article supplement (PMC3568101; doi:10.1371/journal.pone.0055216), 2013-02-08
Supplement: pone.0055216.s018.pdf [file pone.0055216.s018.pdf]

|                                  |                                     | 150                                 |                         | 192                     |                |
|----------------------------------|-------------------------------------|-------------------------------------|-------------------------|-------------------------|----------------|
| Xanthomonadales                  | <i>Xylella fastidiosa</i>           | 15837961                            | GAMPPMLGWAAVTGLSTAADW   | INAS LLVAIIFVWTPPHFWALA |                |
|                                  | <i>Xanthomonas campestris</i>       | 21233252                            | --T-----P-S---          | ---L---I-----           |                |
|                                  | <i>Xanthomonas oryzae</i>           | 84625568                            | --T-----P-S---          | ---L---I-----           |                |
|                                  | <i>Xanthomonas fuscans</i>          | 294666751                           | --T-----P-S---          | ---L---I-----           |                |
|                                  | <i>Xanthomonas axonopodis</i>       | 21244603                            | --T-----P-S---          | ---L---I-----           |                |
|                                  | <i>Xanthomonas vesicatoria</i>      | 325918187                           | --T-----P-T---          | I--L---I-----           |                |
|                                  | <i>Xanthomonas perforans</i>        | 325928849                           | --T-----P-S---          | ---L---I-----           |                |
|                                  | <i>Xanthomonas albilineans</i>      | 285017221                           | --A-L----I--MQGQW--     | AY-- --L-----           |                |
|                                  | <i>Pseudoxanthomonas suwonensis</i> | 319785801                           | --A-L----NMQGSW--       | QH-L --L-----           |                |
|                                  | <i>Pseudoxanthomonas spadix</i>     | 357418726                           | --T-L----MQGPW--        | GHSL --L-----           |                |
|                                  | <i>Stenotrophomonas maltophilia</i> | 194364097                           | -----MQGSS--            | AYS- --L---I-----       |                |
|                                  | <i>Stenotrophomonas sp. SKA14</i>   | 254525124                           | -----MQGSS--            | AYS- --L---I-----       |                |
|                                  | <i>Rhodanobacter sp. 2APBS1</i>     | 352086526                           | --I--V--T---ALHPYAL     | Q-CL-----               |                |
|                                  | <i>Alcanivorax borkumensis</i>      | 110834767                           | --I--L--T---EAHPYA-     | ---L-----               |                |
|                                  | Other<br>γ-Proteobacteria           | <i>Alkalilimnicola ehrlichii</i>    | 114319463               | --A-L--T---SVD-HAL      | --FL-V-----    |
| <i>Alteromonadales bacterium</i> |                                     | 119471373                           | -----VSE-NQMA--P-       | --M---T-----            |                |
| <i>Alteromonas macleodii</i>     |                                     | 239993291                           | --A-L--T---EIH-HAL      | --L---T-----            |                |
| <i>Cellvibrio japonicus</i>      |                                     | 192359423                           | -----L--T-I--EIHSHAL    | --M---T-----            |                |
| <i>Colwellia psychrithraea</i>   |                                     | 71278210                            | --I--L--T-M-NEVVPNAL    | --L---T-----            |                |
| <i>Congregibacter litoralis</i>  |                                     | 88705362                            | --A-L--T---EVHGHAL      | --L---A-----            |                |
| <i>Grimontia hollisae</i>        |                                     | 262273569                           | -----L--V---TLDHAL      | --ML--T-----            |                |
| <i>Hahella chejuensis</i>        |                                     | 83642966                            | --A-L--T---TS---TVDPHAL | --L---A-----            |                |
| <i>Idiomarina loihiensis</i>     |                                     | 56459364                            | --A-L--T---TS--NEIN-PAV | --M---T-----            |                |
| <i>Kangiella koreensis</i>       |                                     | 256823546                           | --I--L--T---SADPHA-     | --L---T-----S           |                |
| <i>Legionella drancourtii</i>    |                                     | 254495813                           | --A-L--T---NHLDPQAL     | --L---T-----            |                |
| <i>Legionella pneumophila</i>    |                                     | 54293406                            | --A-L--T---DQLDPQAL     | --L---T-----            |                |
| <i>Marinobacter algicola</i>     |                                     | 149375586                           | -----L--T---QVEGHAL     | --L---A-----            |                |
| <i>Marinomonas sp. MED121</i>    |                                     | 87121367                            | -----L--VSI--TLEPNAL    | --L---A-----            |                |
| <i>Methylophaga thiooxidans</i>  |                                     | 254491347                           | -----L--T---QVDPNAL     | --L---A-----            |                |
| <i>Nitrococcus mobilis</i>       |                                     | 88811917                            | --A-----T---SIDPNAL     | --FL-----               |                |
| <i>Oceanospirillum sp. MED92</i> |                                     | 89093448                            | --A-L--T---TIEPNAL      | --L---A-----C           |                |
| <i>Psychromonas ingrahamii</i>   |                                     | 119946339                           | -----L--ISE--QLA-QP-    | I--M---T-----           |                |
| <i>Reinekea sp. MED297</i>       |                                     | 88798510                            | -----L--T---SI-GLPL     | --L---A-----            |                |
| <i>Rickettsiella grylli</i>      |                                     | 160871949                           | --T--L--T---NIDSEGL     | --L---I-----S--         |                |
| <i>Saccharophagus degradans</i>  |                                     | 90019693                            | --A-L--V---EVHGHAL      | --L---A-----            |                |
| <i>Shewanella baltica</i>        |                                     | 126172401                           | -----L--T---NEFHGHAL    | --I---T-----            |                |
| <i>Teredinibacter turnerae</i>   |                                     | 254784350                           | --A-L--T---ELDGHGL      | --L---A-----            |                |
| <i>Vibrio alginolyticus</i>      |                                     | 91227004                            | -----L--T---QLH-NA-     | --M---I-----            |                |
| α-Proteobacteria                 |                                     | <i>Phenylobacterium zucineum</i>    | 197104010               | --L--VI---A--SAPLNA-    | --C---M-----S  |
|                                  |                                     | <i>Caulobacter segnis</i>           | 295687730               | --L--AI---A--HAPLNA-    | -M-----F-----S |
|                                  |                                     | <i>Parvularcula bermudensis</i>     | 304320207               | --L--VV---I--DAPL-A-    | V-FS-----      |
|                                  |                                     | <i>Rhodospirillum centenum</i>      | 209966878               | --F--I-----DV-L-SV      | I-F---F-----S  |
|                                  |                                     | <i>Roseomonas cervicalis</i>        | 296536351               | --F--I-----HVSVEAV      | VMF---F-----S  |
|                                  |                                     | <i>Anaplasma phagocytophilum</i>    | 88607088                | --F--VI--TS---IPSIESL   | --FM---L-----S |
|                                  |                                     | <i>Caulobacter sp. K31</i>          | 167648459               | --L--AI---A--HAPLNA-    | -M-L---L-----S |
|                                  |                                     | <i>Oceanicaulis alexandrii</i>      | 83945306                | --F--I-----A--DISLNSV   | --F---L-----S  |
|                                  |                                     | <i>Fulvimarina pelagi</i>           | 114708030               | --F--I-----DVSIEGF      | V-FL---L-----  |
|                                  |                                     | <i>Roseobacter sp. AzwK-3b</i>      | 149915656               | --F--I-----A--TVSIESV   | -MF-L--M-----  |
|                                  |                                     | <i>Beijerinckia indica</i>          | 182677721               | --F--V-Y--A--HFSLSSF    | I-F---I-----   |
|                                  | <i>Stappia aggregata</i>            | 118590728                           | --F--I-----SVSLESF      | V-FL---M-----           |                |
|                                  | <i>Nitrospira multiformis</i>       | 82701325                            | -----V-----EVS-DAL      | --FL---A-----           |                |
|                                  | <i>Thauera sp. MZ1T</i>             | 217969470                           | --L--V--T-M--TVG-EA-    | --MM-V-T-----           |                |
|                                  | β-Proteobacteria                    | <i>Polynucleobacter necessarius</i> | 145590110               | -----A-----NGLS-EA-     | --L-----       |
| <i>Burkholderia ambifaria</i>    |                                     | 115352945                           | -----A-----AVPGDA-      | I--L-----V--            |                |
| <i>Nitrosomonas europaea</i>     |                                     | 30249013                            | -----V-----EIS-DAL      | --FL---A-----           |                |
| <i>Aromatoleum aromaticum</i>    |                                     | 56477833                            | -----V-----EVS-DAL      | --FL---A-----           |                |
| <i>Ralstonia eutropha</i>        |                                     | 113866382                           | -----A-----A-EVP-EA-    | F--L---T-----           |                |
| <i>Thiomonas intermedia</i>      | 296137015                           | -----V-----S-NVSDAM                 | --FL---L-----           |                         |                |

Figure S18

Partial sequence alignment of protoheme IX farnesyltransferase showing a 4 aa insert in conserved region that is uniquely shared by subclade of Xanthomonadales after the divergence of *Rhodanobacter sp. 2APBS1*.
