# Supplementary material for: Phylogenomics and Molecular Signatures for Species from the Plant Pathogen-Containing Order Xanthomonadales
Source: PubMed Central journal article supplement (PMC3568101; doi:10.1371/journal.pone.0055216), 2013-02-08
Supplement: pone.0055216.s019.pdf [file pone.0055216.s019.pdf]

|                             |                              | 583                                                      | 638                                                         |
|-----------------------------|------------------------------|----------------------------------------------------------|-------------------------------------------------------------|
| Xanthomonadales             | Xanthomonas albilineans      | 285018805                                                | LTIIDWAVKAINVRHARAGIPAVEITAIPLDDVPT Y KDIFASGSGTGAVFQFESSGM |
|                             | Xanthomonas axonopodis       | 21242159                                                 | -----DP-D----- - -GV----N-----                              |
|                             | Xanthomonas fuscans          | 294666388                                                | -----DP-D----- - -GV----N-----                              |
|                             | Xanthomonas campestris       | 78047019                                                 | -----DP-D----- - -GV----N-----                              |
|                             | Xanthomonas oryzae           | 166712747                                                | -----DP-D-T----- - -GV----N-----                            |
|                             | Xanthomonas gardneri         | 325923963                                                | -----DP-D-TL----- - -GV----N-----                           |
|                             | Xanthomonas vesicatoria      | 325916626                                                | -----DP-D-T----- - -GV----N-----                            |
|                             | Xanthomonas perforans        | 325929585                                                | -----DP-D----- - -GV----N-----                              |
|                             | Xylella fastidiosa           | 71898629                                                 | -----K-----C-DP-D---L---I--- - -V----N-S-----               |
|                             | Stenotrophomonas maltophilia | 194365029                                                | -----K-E---P-D-A-----T-- - ----N-N-----                     |
|                             | Stenotrophomonas sp. SKA14   | 254524078                                                | -----K-E---P-D-A-----T-- - ----N-N-----                     |
|                             | Pseudoxanthomonas suwonensis | 319787804                                                | -----R-E---PLD-A-L---AA- - ----N-----                       |
|                             | Rhodanobacter sp. 2APBS1     | 352086322                                                | -----A-R-K--EALL--S-L---PAS YELLKKAQ-V----L----             |
|                             | Alcanivorax borkumensis      | 110834019                                                | -----A-KR--E-LDDLVDH----S-S F-LLKR-D-T----L--Q--            |
|                             | Alcanivorax sp. DG881        | 254428613                                                | -----A-KRG-E-LDDLVDH----G-S F-LLKR-D-T----L--Q--            |
|                             | Alkalilimnicola ehrlichii    | 114321000                                                | -----T---V-ALREQR-ETPLD-AR----RA- F-LLKRCQ-T----L--R--      |
|                             | Alteromonadales bacterium    | 119471146                                                | ---LQ--DMT---MQ-E-KDP-D-NT----KKS IELLRAE-T----L--R--       |
|                             | Cardiobacterium hominis      | 258546181                                                | ---V---LGH--A-RT-E-Q-PLD-ATL---PQ- YALLQ-TR-T----L----      |
|                             | Chromohalobacter salexigens  | 92112711                                                 | -----LEMVDTVR--E-QGPLD-AS----- F-MLKKA-E-T----L--R--        |
|                             | Citrobacter koseri           | 157147384                                                | -----N-LEM--A-REKN-E-PLD-A-----KKS F-MLQRSE-T----L--R--     |
| Cronobacter turicensis      | 260596604                    | ---N--LDM--A-R-KQ-LEPID-A-----KKS F-MLQRSE-T----L--R--   |                                                             |
| Dickeya zeae Ech1591        | 251790730                    | ---N--LEM--A-REKQ-LEP-D-A-----KNS F-MLQRSE-T----L--R--   |                                                             |
| Edwardsiella ictaluri       | 238918790                    | ---N--LEM--A-R-CQ-LEP-D-A-----QKS F--LQRAE-T----L--R--   |                                                             |
| Enterobacter cancerogenus   | 261338818                    | -----L-M--P-REKQ-LEPID-A-----KKS F-MLQRSE-T----L--R--    |                                                             |
| Erwinia amylovora           | 292489212                    | -----LAM--AKR-KS-EAPID-A-----E-KKS F-MLQRSE-T----L--R--  |                                                             |
| Escherichia coli            | 19548812                     | ---N--LEM--K-R-KN-E-PLD-A-----KKS F-MLQRSE-T----L--R--   |                                                             |
| Haemophilus influenzae      | 301169460                    | ---K--LDM---MV-E-K-R-D-A-----PES FELLKRSE-T----L--R--    |                                                             |
| Hahella chejuensis          | 83644688                     | ---V---DI--RQ--EK-Q-PLD-NF----A-- FNLLKH-E-T----L--R--   |                                                             |
| Klebsiella pneumoniae       | 206579408                    | ---N--LEM--K-R-KN-EGPLD-A-----KKS F-MLQRSE-T----L--R--   |                                                             |
| Legionella longbeachae      | 270156895                    | -----LATV-RQRG-E-L-PID-SQ--T--PAS F-LLKACQ-T----L--R--   |                                                             |
| Marinobacter algicola       | 149377463                    | -----L-M--P-LEKQ-K--LD-NE-----S F-MLKKA-E-T----L--R--    |                                                             |
| Methylococcus capsulatus    | 53804349                     | -----LAD--AKRRA--EEP-D-NR----PK- YELLGRCA-T----L--R--    |                                                             |
| Pantoea ananatis LMG        | 291616361                    | -----L-M--P-REKQ-L-PID-AT---E-KKS F-MLQRAE-T----L--R--   |                                                             |
| Pasteurella multocida       | 15601899                     | ---K--LDM--T-L-KE-K-P-D-AT----PAS FELLKRSE-T----L--R--   |                                                             |
| Pectobacterium atrosepticum | 50119986                     | -----LEM--A-R-KL-QEPID-AT---G-KKS F-MLQRSE-T----L--R--   |                                                             |
| Photobacterium symbiotica   | 253988140                    | ---N--LEM--A-R-KK-LEPID-A-----N-NKS F-MLQRAE-T----L--R-- |                                                             |
| Proteus mirabilis           | 227357235                    | ---N--LEM--A-R-KKSLEP-D-S--S-T-QRS F-MLQRSE-T----L--R--  |                                                             |
| Providencia stuartii        | 188025561                    | ---N--LEM--A-R-KKNLEP-D-A-----QKS F-MLQRSE-T----L--R--   |                                                             |
| Pseudomonas aeruginosa      | 152987648                    | ---K--MEI--REQ-KK-LEP-N-DF----K-- YALLQKAE-T----L--R--   |                                                             |
| Salmonella enterica         | 213609772                    | ---N--LEM--K-R-KN-E-PLD-A-----KKS F-MLQRSE-T----L--R--   |                                                             |
| Serratia odorifera          | 270264805                    | -----LGM--A-R-KS-LEPID-A-----E-KKS F-MLQRSE-T----L--R--  |                                                             |
| Shewanella amazonensis      | 119774291                    | -----LGM--P-L-KL-K-P-D-A-----SKS FSVLKRYE-T----L--R--    |                                                             |
| Shigella flexneri           | 41817835                     | ---N--LEM--K-R-KN-E-PLD-A-----KKS F-MLQRSE-T----L--R--   |                                                             |
| Teredinibacter turnerae     | 254785234                    | -----TM-DQRT-L-E-PLD-S-----PT- F-MLKKA-E-T----L--R--     |                                                             |
| Tolunomas auensis           | 237808841                    | ---K--LDM--P-LKTE-K-P-D-A-----PTS FK-LKNSE-T----L--R--   |                                                             |
| Vibrio cholerae             | 940886                       | -----LGLV-P-LKK--K-P-R-E-----ARS FRNLQDAK-T----L--R--    |                                                             |
| Xenorhabdus bovienii        | 290473672                    | ---N--LDMV-A-RTHKNLEPID-----QIS F-MLQRSE-T----L--R--     |                                                             |
| Yersinia intermedia         | 238792741                    | ---N--LEM--AKR-KT-LEPID-AS---E-KKS F-MLQRSE-T----L--R--  |                                                             |

Figure S19

Partial sequence alignment DNA polymerase III subunit alpha showing a 1 aa insert that is uniquely present in a subclade of Xanthomonadales except *Rhodanobacter* sp. 2APBS1.

Alpha and beta have 3 aa deletion at the same position
