# Supplementary material for: Phylogenomics and Molecular Signatures for Species from the Plant Pathogen-Containing Order Xanthomonadales
Source: PubMed Central journal article supplement (PMC3568101; doi:10.1371/journal.pone.0055216), 2013-02-08
Supplement: pone.0055216.s020.pdf [file pone.0055216.s020.pdf]

|                           |                                | 155                      |                           | 200                  |
|---------------------------|--------------------------------|--------------------------|---------------------------|----------------------|
|                           | Stenotrophomonas maltophilia   | 194364258                | LDEADRLDMGFLPSIKRILAKLPKQ | N RQTLLFSATFEDNIRQLA |
|                           | Stenotrophomonas sp. SKA14     | 254524903                | -----                     | -----                |
| Xanthomonadales           | Xanthomonas albilineans        | 285019480                | -----T-----               | -----EG-K---         |
|                           | Xanthomonas oryzae             | 166713488                | -----T--R-                | D-----E--K---        |
|                           | Xanthomonas campestris         | 78049289                 | -----T--R-                | D-----E--K---        |
|                           | Xanthomonas axonopodis         | 21244335                 | -----T--R-                | D-----E--K---        |
|                           | Xanthomonas fuscans            | 294625538                | -----T--R-                | D-----E--K---        |
|                           | Xanthomonas vesicatoria        | 325915753                | -----T--R-                | D-----E--K---        |
|                           | Xanthomonas gardneri           | 325921307                | -----T--R-                | D-----E--K---        |
|                           | Pseudoxanthomonas suwonensis   | 319788058                | -----                     | -----PES-K---        |
|                           | Pseudoxanthomonas spadix       | 357418532                | -----                     | -----D---KL---       |
|                           | Xylella fastidiosa             | 28198088                 | -----G--R-                | -----AEP-K---        |
|                           | Rhodanobacter sp. 2APBS1       | 352081056                | -----AL---QSV--K          | -----APA-KT--        |
|                           | Aeromonas hydrophila           | 117621566                | -----IRD-R---L---K        | --N-----A-E--E--     |
|                           | Aliivibrio salmonicida         | 209808966                | -----IHD--K--N---N        | --N-----S-E-----     |
|                           | Alkalilimnicola ehrlichii      | 114320766                | -----IRD-R-VI-AV---       | ---M-----SKE-----    |
|                           | Alteromonadales bacterium      | 119471733                | -----IHD--LI--M-AK        | --N-M-----S-D--A--   |
| Cellvibrio japonicus Ueda | 192362464                      | -----IHD--KV--L---       | --N-----S-D-KA--          |                      |
| Citrobacter koseri        | 157146569                      | -----IHD-R-V---PK        | --N-----S-D-KA--          |                      |
| Cronobacter sakazakii     | 156934713                      | -----IHD-R-V---PK        | --N-----S-D-KS--          |                      |
| Dickeya zeae              | 251790108                      | -----IHD-R-V---PK        | --N-----S-E-KE--          |                      |
| Enterobacter cloacae      | 296103277                      | -----IHD-R-V---PR        | --N-----S-D-KA--          |                      |
| Erwinia amylovora         | 292487709                      | -----IHD-R-V---AK        | --N-----S-E-KT--          |                      |
| Erwinia billingiae        | 300715940                      | -----IHD-R-V---AK        | --N-----S-E-KG--          |                      |
| Hahella chejuensis        | 83645104                       | -----I-DV---VRAT-RE      | -----SED-KN---            |                      |
| Other<br>γ-Proteobacteria | Kangiella koreensis            | 256821317                | -----IG---K               | -----SES-KAIS        |
|                           | Klebsiella pneumoniae          | 206579391                | -----IHD-R-V---AR         | --N-----S-E-KG--     |
|                           | Marinomonas sp. MWYL1          | 152995016                | -----IHD--K--I---K        | --N-----SPE-----     |
|                           | Moritella sp. PE36             | 149908418                | -----RD-RK--V--QK         | --N-----S-D-----     |
|                           | Pantoea ananatis               | 291616785                | -----IHD-R-V---AK         | --N-----S-E-KT--     |
|                           | Pectobacterium wasabiae        | 261822185                | -----IHD-R-V---AK         | --N-----S-E-KA--     |
|                           | Providencia stuartii           | 183598226                | -----IHD-R-VIS---K        | --N-----SNE-K---     |
|                           | Psychromonas ingrahamii        | 119946865                | -----IHD-----V---         | --N-----SPD--R--     |
|                           | Salmonella enterica            | 161504014                | -----IHD-R-V---PK         | --N-----S-D-KA--     |
|                           | Serratia proteamaculans        | 157369574                | -----IHD-R-V---AK         | --N-----S-D-KG--     |
|                           | Shewanella denitrificans       | 91794376                 | -----IRD-RKV--M---        | --N-M-----S-D--E--   |
|                           | Thiomicrospira crunogena       | 78485124                 | -----IHD---KA--N          | --N-----SNE-----     |
|                           | Vibrio alginolyticus           | 91224087                 | -----IRD-RK--L---         | --N-----S-E--D--     |
|                           | Yersinia pestis                | 16611843                 | -----IHD-R-V---AK         | --N-----S-E-KG--     |
|                           | α-Proteobacteria               | Acetobacter pasteurianus | 258542730                 | I-----I-D-EK-VGL--PN |
| Granulibacter thesedensis |                                | 114327981                | I-----I-DVE--VSL--HN      | ---F---MAPE--R--     |
| Hoeflea phototrophica     |                                | 163758551                | ---Q---I--M-A-----MT-AT   | -----MPKE----S       |
| Rhodospirillum rubrum     |                                | 83594050                 | I-----I-DVE--V-L--I       | ---F---MDKE--R--     |
| Acetobacter tropicalis    |                                | 339018830                | I-----I-D-EK-VGL--AN      | ---F---MAPA-----     |
| β-Proteobacteria          | Magnetospirillum gryphiswalden | 144901078                | I-----I-DVQ--VSM---M      | ---F---LGPE--K--     |
|                           | Thauera sp. MZ1T               | 217970063                | I-----I-D-----L---        | --S-----S-E-KR--     |
|                           | Nitrosospira multififormis     | 82703770                 | -----D-----L--S-          | --S-M-----S-E-KK--   |
|                           | Methylotenera mobilis          | 253996648                | -----M-DL-----L---        | --N-M-----SNE-KK--   |
| Burkholderia oklahomensis | 167568882                      | -----IHD--V-----K        | --N-----S-E-KS--          |                      |
| Neisseria meningitidis    | 325198557                      | -----IDD-RK-MQM----      | -----SAP--K--             |                      |

Figure S20

Partial sequence alignment of a conserved region in the DEAD box helicase domain-containing protein showing a 1 aa insert that is specific for Xanthomonadales except *Rhodanobacter* sp. 2APBS1.
