# Supplementary material for: Phylogenomics and Molecular Signatures for Species from the Plant Pathogen-Containing Order Xanthomonadales
Source: PubMed Central journal article supplement (PMC3568101; doi:10.1371/journal.pone.0055216), 2013-02-08
Supplement: pone.0055216.s021.pdf [file pone.0055216.s021.pdf]

|                           |                              | 127              |                        | 169                   |
|---------------------------|------------------------------|------------------|------------------------|-----------------------|
|                           | Stenotrophomonas maltophilia | 194367055        | FPLPVEVIPMARSLIARQIRDM | TGGQPTWREGVVTDNGNQILD |
|                           | Stenotrophomonas sp. SKA14   | 254522924        | -----V-----            | -----V-----VV--       |
|                           | Xanthomonas oryzae           | 84622680         | -----V---LAL           | -----V-D-----VV--     |
|                           | Xanthomonas campestris       | 289668028        | -----V---LAL           | -----V-D-----VV--     |
|                           | Xanthomonas axonopodis       | 21109766         | -----V---LAL           | -----V-D-----VV--     |
|                           | Xanthomonas fuscans          | 294627128        | -----V---LAL           | -----V-D-----VV--     |
| Xanthomonadales           | Xanthomonas albilineans      | 285017577        | ---I-----V-E-LAR       | S---V-D-I---V---      |
|                           | Xanthomonas gardneri         | 325922299        | -----V---LAL           | -----V-DN-I---VV--    |
|                           | Xanthomonas perforans        | 325927881        | -----V---LAL           | -----V-D-----VV--     |
|                           | Xanthomonas vesicatoria      | 325917033        | -----V---LA-           | -----V-D-----VV--     |
|                           | Xylella fastidiosa           | 71897970         | ---I-----V---MTL       | D---V---I---V---      |
|                           | Pseudoxanthomonas spadix     | 357418380        | -----V-E-LTL           | -----V-D-T---L---     |
|                           | Pseudoxanthomonas suwonensis | 319788230        | -----V-R-LAL           | -----V-D-----W---     |
|                           | Rhodanobacter sp. 2APBS1     | 352089795        | --V-I-----G-E-VKR      | -H-V-D-----W-I-       |
|                           | Aeromonas hydrophila         | 117620736        | -----EYV-E-KL          | -N-V-----H---         |
|                           | Alcanivorax borkumensis      | 110835467        | ---I-----YV-KLVAL      | ---QY---FL---I---     |
| Alcanivorax sp. DG881     | 254429859                    | -----YV-KLVAL    | ---EY-F-----I---       |                       |
| Aliivibrio salmonicida    | 209695960                    | -----YV-ELVKL    | -D-AY-----M---         |                       |
| Azotobacter vinelandii    | 226946833                    | -----HV---LVML   | -D-VY-----V---         |                       |
| Beggiatoa sp. PS          | 153877568                    | -----YV-ELVK-    | -K-V---AF-T---V---     |                       |
| Candidatus Regiella       | 304414795                    | -----F---ELIKL   | -M-KY-QN-L-----I-      |                       |
| Cellvibrio japonicus      | 192361815                    | -----FV-ELVKL    | -A-VY---I---V---       |                       |
| Citrobacter koseri        | 157148454                    | -----AV---LVKL   | -R-EY-Q-----V---       |                       |
| Cronobacter turicensis    | 260599255                    | -----AV---LVKL   | -R-EY-Q-----V---       |                       |
| Dickeya zeae              | 251788159                    | -----AYV-ELVKL   | ---VY-D-----I---       |                       |
| Edwardsiella ictaluri     | 238921219                    | -----AYV-ELVKL   | ---VY-Q-L---V---       |                       |
| Enterobacter cloacae      | 296104576                    | -----AV-ELVKL    | -R-EY-Q-----V---       |                       |
| Erwinia pyrifoliae        | 283479656                    | -----YV-ELVKL    | -L-EY-QD-----I---      |                       |
| Escherichia coli          | 188494875                    | -----AV---LVKL   | -R-EY-Q-----V---       |                       |
| Other<br>γ-Proteobacteria | Grimontia hollisae           | 262273693        | -----YV-ELVKL          | -D-CY---CI---V---     |
|                           | Klebsiella pneumoniae        | 206578185        | -----AV---LVKL         | -R-EY-Q-----V---      |
|                           | Marinomonas sp. MED121       | 87123015         | -----S-YV-ELVKL        | -D-VY-----V---        |
|                           | Nitrosococcus watsoni        | 300113160        | -----YV---VKL          | -E-VY---FI-----V---   |
|                           | Pantoea ananatis             | 291618750        | -----YV-ELVKL          | -L-EY-QN-----I---     |
|                           | Pectobacterium wasabiae      | 261823110        | -----YV-ELAKL          | ---VY-Q-----V---      |
|                           | Photobacterium profundum     | 90412060         | -----F-G-ELVKL         | -D-EY-Q-----I-I-      |
|                           | Photorhabdus asymbiotica     | 253988632        | -----YV-ELVKL          | -V-KY-QN-----V---     |
|                           | Proteus mirabilis            | 197285883        | -----YV-ELVKL          | -L-EY-N-----V---      |
|                           | Providencia stuartii         | 183599858        | -----YV-ELVKL          | -V-EY-QN-----V---     |
| Pseudomonas putida        | 167036190                    | -----HV---LVKL   | -D-VY-----V---         |                       |
| Salmonella enterica       | 161506390                    | -----AV---LVKL   | -R-EY-Q-----V---       |                       |
| Shewanella violacea       | 294139516                    | -----YV---LVKL   | -D-VY---CL---I---      |                       |
| Shigella dysenteriae      | 194431760                    | -----AV---LVKL   | -R-EY-Q-----V---       |                       |
| Sodalis glossinidius      | 85059988                     | -----AWW-ELVRL   | -A-VY-Q-----I---       |                       |
| Tolumonas auensis         | 237808778                    | -----L-EYV-EL-KL | -N-VY---I---QC---      |                       |
| Vibrio cholerae           | 15642476                     | -----YV-ELVKL    | -D-VY---I---V---       |                       |
| Xenorhabdus nematophila   | 300722096                    | -----AYV-ELVKL   | -T-VY-N-----D---       |                       |
| β-Proteobacteria          | Nitrosomonas eutropha        | 114331805        | -----YV-E-ALL          | ---A-QDFT---V---      |
|                           | Sideroxydans lithotrophicus  | 291615188        | ---I-----Y-ELVKL       | ---KL---FT---V---     |
|                           | Thiobacillus denitrificans   | 74318382         | -----HV-ELVKL          | ---RL---FT---V---     |
|                           | Laribacter hongkongensis     | 226939813        | -----V-KLVKL           | -H-E---NF---L---      |
|                           | Chromobacterium violaceum    | 34496715         | ---I-----YV-ELVKL      | -H-EL-Q-T---V---      |
|                           | Gallionella capsiferiformans | 302879703        | ---I-----SV---LVAL     | ---ML---FT---I-I-     |
|                           | Thiomonas intermedia         | 296136750        | -----V---E-V-RL-AL     | -D-RE-S-Y---L---      |
| Nitrosospira multiformis  | 82701570                     | -----GHV-E-VRL   | ---ML-Q-FT---V---      |                       |

Figure S21

Partial sequence alignment of a conserved region in ribose-5-phosphate isomerase A showing a 1 aa insert that is commonly shared by Xanthomonadales except *Rhodanobacter* sp. 2APBS1.

Alpha has longer insert about 8-10 aa long
