# Supplementary material for: Phylogenomics and Molecular Signatures for Species from the Plant Pathogen-Containing Order Xanthomonadales
Source: PubMed Central journal article supplement (PMC3568101; doi:10.1371/journal.pone.0055216), 2013-02-08
Supplement: pone.0055216.s022.pdf [file pone.0055216.s022.pdf]

|                                 |                                       | 136                               | 180                                              |                         |
|---------------------------------|---------------------------------------|-----------------------------------|--------------------------------------------------|-------------------------|
| Xanthomonadales                 | <i>Xanthomonas axonopodis</i>         | 21244827                          | AQLVRPGIELVNTMSGSRMDSDA A V IAKFGVRPEQIVDLLALMGD |                         |
|                                 | <i>Xanthomonas fuscans</i>            | 294664756                         | -----V-----                                      |                         |
|                                 | <i>Xanthomonas oryzae</i>             | 166710273                         | -----D-----                                      |                         |
|                                 | <i>Xanthomonas campestris</i>         | 78049756                          | -----D-----                                      |                         |
|                                 | <i>Xanthomonas albilineans</i>        | 285016940                         | -----VQ-----                                     |                         |
|                                 | <i>Xanthomonas vesicatoria</i>        | 325917393                         | -----N-----                                      |                         |
|                                 | <i>Xanthomonas perforans</i>          | 325924860                         | -----D-----                                      |                         |
|                                 | <i>Xanthomonas gardneri</i>           | 325923784                         | -----E-----                                      |                         |
|                                 | <i>Stenotrophomonas maltophilia</i>   | 190576375                         | -----T-----                                      |                         |
|                                 | <i>Stenotrophomonas</i> sp. SKA14     | 254524679                         | -----T-----                                      |                         |
|                                 | <i>Xylella fastidiosa</i>             | 71276059                          | -----V-----T-----AM                              |                         |
|                                 | <i>Pseudoxanthomonas spadix</i>       | 357415770                         | -----V-----                                      |                         |
|                                 | <i>Rhodanobacter</i> sp. 2APBS1       | 352086477                         | ---GSHVT---NTVL--AG                              |                         |
|                                 | <i>Azotobacter vinelandii</i>         | 226942232                         | ---DGH-T---T---VL-HAG                            |                         |
|                                 | <i>Candidatus</i> <i>Hamiltonella</i> | 238898050                         | ---S-H-T-I---NDKTL-P-G                           |                         |
|                                 | <i>Citrobacter koseri</i>             | 157147357                         | ---T-N-T-I---TNTILGP-E                           |                         |
|                                 | <i>Enterobacter cloacae</i>           | 296105444                         | ---T---T-I---TNTILGPEE                           |                         |
|                                 | <i>Escherichia coli</i>               | 195940271                         | ---T-N-T-I---TNTILGPEE                           |                         |
|                                 | Other<br>γ-Proteobacteria             | <i>Haemophilus influenzae</i>     | 145640969                                        | ---DDN-M-I---NN-LL-REG  |
|                                 |                                       | <i>Haemophilus parainfluenzae</i> | 301154826                                        | ---DDN-M-I---NNTLL-R--  |
| <i>Haemophilus somnus</i>       |                                       | 170717348                         | ---DDN-M-I---NN-LL-R-G                           |                         |
| <i>Klebsiella pneumoniae</i>    |                                       | 238892277                         | ---T---T-I---TNTILGP-E                           |                         |
| <i>Legionella drancourtii</i>   |                                       | 254497331                         | ---NEHVT-I---NYT--VAG                            |                         |
| <i>Marinobacter algicola</i>    |                                       | 149378378                         | ---SDHVT-I---TDT--R-G                            |                         |
| <i>Methylophaga thiooxidans</i> |                                       | 254492177                         | ---NQHVT---TETTL-P-G                             |                         |
| <i>Photobacterium damsela</i>   |                                       | 269103720                         | ---DEN-T-I---TDVV--PAG                           |                         |
| <i>Pseudomonas aeruginosa</i>   |                                       | 152985854                         | ---DGH-T---T---L-V-G                             |                         |
| <i>Pseudomonas entomophila</i>  |                                       | 104779389                         | ---DGHVT---T---VL-VAG                            |                         |
| <i>Rickettsiella grylli</i>     |                                       | 160872753                         | ---CEE-T---TNT-L-RQG                             |                         |
| <i>Salmonella enterica</i>      |                                       | 161505500                         | ---T-N-T-I---TNTILGP-E                           |                         |
| <i>Shigella flexneri</i>        |                                       | 110807452                         | ---T-N-T-I---TNTILGPEE                           |                         |
| <i>Teredinibacter turnerae</i>  |                                       | 254784333                         | ---NEH-T---TDTV--IEG                             |                         |
| <i>Vibrio alginolyticus</i>     |                                       | 91224944                          | ---DDN-T-I---TNVV--REG                           |                         |
| α-Proteobacteria                |                                       | <i>Rhodobacteraceae bacterium</i> | 254511729                                        | M---GD-V-MLDA-KNK-I-R-G |
|                                 |                                       | <i>Ruegeria</i> sp. R11           | 254474520                                        | M---GG-V-MLDA-KNK-I---G |
|                                 |                                       | <i>Azospirillum</i> sp. B510      | 288961988                                        | M-----GMFDP-KNKAIGP-E   |
|                                 |                                       | <i>Rhodomicrobium vannielii</i>   | 312115891                                        | M-----VTMLD--KNKVIGEEAE |
|                                 |                                       | <i>Roseobacter litoralis</i>      | 338759679                                        | M---GD-V-MLDA-KNK-I-R-G |
|                                 | <i>Silicibacter</i> sp. TrichCH4B     | 259417724                         | M---GD-V-MLDA-KNK-I---G                          |                         |
|                                 | <i>Phaeobacter gallaeciensis</i>      | 163742064                         | M---GG-V-MLDA-KNK-I-T-G                          |                         |
|                                 | <i>Granulibacter bethesdensis</i>     | 114328629                         | M---IQ--V-MQDPIKQKTIGPAE                         |                         |
|                                 | <i>Sagittula stellata</i>             | 126732262                         | M---GD-V-MLDP-KNK-I-REG                          |                         |
|                                 | <i>Kingella kingae</i>                | 333376435                         | ---S-R-T---KNEML-H-G                             |                         |
| β-Proteobacteria                | <i>Thauera</i> sp. MZ1T               | 237654465                         | T-----VRW-----EEVL-EAG                           |                         |
|                                 | <i>Azoarcus</i> sp. BH72              | 119899889                         | T-----VRW-----EEVL-EAG                           |                         |
|                                 | <i>Neisseria bacilliformis</i>        | 329119683                         | ---NERVT-----ETL-T-G                             |                         |
|                                 | <i>Simonsiella muelleri</i>           | 294789122                         | ---NTQ-T---KNETL--AG                             |                         |
|                                 | <i>Aromatoleum aromaticum</i>         | 56477692                          | T-----VRW-----DEVL-EAG                           |                         |
|                                 | <i>Burkholderia rhizoxinica</i>       | 312795716                         | ---NERVT-I---TNE-L-R-G                           |                         |
|                                 | <i>Neisseria mucosa</i>               | 261364888                         | ---NERVT-----ETL-IEG                             |                         |

Figure S22

Partial sequence alignment of a conserved region in DNA polymerase I showing a 1 aa insert that is uniquely shared by a subclade of Xanthomonadales except *Rhodanobacter* sp. 2APBS1.
