# Supplementary material for: Phylogenomics and Molecular Signatures for Species from the Plant Pathogen-Containing Order Xanthomonadales
Source: PubMed Central journal article supplement (PMC3568101; doi:10.1371/journal.pone.0055216), 2013-02-08
Supplement: pone.0055216.s023.pdf [file pone.0055216.s023.pdf]

|                                     |                                     | 343                                  | 391                                     |                                         |                                       |
|-------------------------------------|-------------------------------------|--------------------------------------|-----------------------------------------|-----------------------------------------|---------------------------------------|
| Xanthomonadales                     | <i>Stenotrophomonas maltophilia</i> | 194366904                            | YGAKGLAYIKIADNGE                        | VSSPIQKFFSEESFAALVAHVAGAGNGDIVFFGA      |                                       |
|                                     | <i>Stenotrophomonas</i> sp. SKA14   | 254524468                            | -----LSET--                             | -----A-----                             |                                       |
|                                     | <i>Xanthomonas axonopodis</i>       | 21243880                             | -----LSET--                             | -----A-----LK-----                      |                                       |
|                                     | <i>Xanthomonas fuscans</i>          | 294665399                            | -----LSET--                             | I---A-----LK-----                       |                                       |
|                                     | <i>Xanthomonas oryzae</i>           | 166712997                            | -----LSET--                             | -----A-----LK---S-----                  |                                       |
|                                     | <i>Xanthomonas campestris</i>       | 289661892                            | -----LSET--                             | -----A-----A---IK-----                  |                                       |
|                                     | <i>Xanthomonas albilineans</i>      | 285019195                            | -----V---S--                            | I-----DGAA-D--L-----R-----              |                                       |
|                                     | <i>Xanthomonas vesicatoria</i>      | 325918028                            | --S-----LS-T--                          | -----A-----DA---LK-----                 |                                       |
|                                     | <i>Xanthomonas gardneri</i>         | 325922682                            | -----LSET--                             | -----A-----A---L-----L---               |                                       |
|                                     | <i>Xanthomonas perforans</i>        | 325929372                            | -----LSET--                             | -----A-----LK-----                      |                                       |
|                                     | <i>Pseudoxanthomonas suwonensis</i> | 319786198                            | F-----DEA-A                             | I-----DA---LK-----                      |                                       |
|                                     | <i>Pseudoxanthomonas spadix</i>     | 357416639                            | --S-----LSEA--                          | -A--A---AQ-RL---I-----                  |                                       |
|                                     | <i>Xylella fastidiosa</i>           | 71901605                             | ---T---A-L-PT--                         | IT--A-----DA---LS-I-EK-----             |                                       |
|                                     | <i>Rhodanobacter</i> sp. 2APBS1     | 352080098                            | -----WL-VE-LAK                          | GRDG IN--VA--LDDAALDGVLKAT--QS-----     |                                       |
|                                     | <i>Actinobacillus minor</i>         | 257465380                            | -----WA--N-VNA                          | GMEG IQ--VA--LN--V-K--IERTS-Q---L-----  |                                       |
|                                     | <i>Actinobacillus succinogenes</i>  | 152979462                            | -----WL-VN-VNA                          | GLEG -Q--A--L--KIK-IFDRTS-QT---L----    |                                       |
|                                     | <i>Aeromonas hydrophila</i>         | 117618858                            | -----WM-VNEAAN                          | GIEG -Q--VA--L-DAIVREIL-RT--AD---I----  |                                       |
|                                     | <i>Aggregatibacter aphrophilus</i>  | 251793073                            | -----WA-VN-INA                          | GLEG -Q--A--LN--NVWK--AER-K-QT---L----  |                                       |
|                                     | <i>Alteromonas macleodii</i>        | 196156536                            | -----W--VN-A-A                          | GLEG LQ--L--LT-DITN-ILERT--QS---LL----  |                                       |
| <i>Arsenophonus nasoniae</i>        | 284007618                           | -----WM-VNSLA-                       | NQAD IQ--A--LPQHVIDN-L-RTQ-KA---LL----  |                                         |                                       |
| <i>Citrobacter koseri</i>           | 157145355                           | -----VTERAK                          | GLEG IN--VA--LNA-IVE-ILDRTA-QD--MI----  |                                         |                                       |
| <i>Congregibacter litoralis</i>     | 88705602                            | ---R--W--VN-LAA                      | GVEG LQ--L--MP-DVV-SMMERL-VA-----       |                                         |                                       |
| <i>Cronobacter sakazakii</i>        | 156933556                           | -----VNERAK                          | GLDG IN--VA--LNA-IVE-ILERT--QD--MI----  |                                         |                                       |
| <i>Dickeya zeae</i>                 | 251789862                           | -----VNEKAK                          | GLEG IQ--VA--LNDGIL-D-L-RTA-DD---L----  |                                         |                                       |
| <i>Edwardsiella ictaluri</i>        | 238919498                           | -----WM-VN-RAA                       | GMDG -Q--A--LNA-VLEGIL-RS--QS---I----   |                                         |                                       |
| <i>Enterobacter cloacae</i>         | 296101795                           | -----VTERAK                          | GLEG IT--VA--LNA-IVE-ILERT--QD--MI----  |                                         |                                       |
| <i>Erwinia tasmaniensis</i>         | 188533627                           | -----VNERAK                          | GIEG IT--VA--LNA-IVESILQRTA-AD--LI----  |                                         |                                       |
| <i>Escherichia</i>                  | 284921786                           | -----VNERAK                          | GLEG IN--VA--LNA-IIE-ILDRTA-QD--MI----  |                                         |                                       |
| <i>Grimontia hollisae</i>           | 262276116                           | -----WV-VN-RAA                       | GMEG IQ--VA--LT-DVVN-ILERT--ES---IL---- |                                         |                                       |
| <i>Haemophilus ducreyi</i>          | 33151787                            | -----WA--N-INA                       | GMDG IQ--VA--LNA-I-N--IERTA-Q---L----   |                                         |                                       |
| <i>Halorhodospira halophila</i>     | 121999005                           | -----VN-PAQ                          | GVEG LQ--V--LT--AVRGILERT--QA--V-----   |                                         |                                       |
| Other<br>γ-Proteobacteria           | <i>Klebsiella pneumoniae</i>        | 206581095                            | -----VTERAK                             | GMDG IN--VA--LTA-IVE-ILERT--QD--MI----  |                                       |
|                                     | <i>Marinobacter algicola</i>        | 149375108                            | -----VN-TSK                             | GVEG LQ--I--LGGDVAQ-VIERS-ED-----       |                                       |
|                                     | <i>Nitrosococcus watsoni</i>        | 300113111                            | -----VIERSR                             | GREG LQ--L--LPD-VIG-MLERI--E-----       |                                       |
|                                     | <i>Pantoea ananatis</i>             | 291617759                            | -----WM-VNERAK                          | GLEG -Q--VA--LNADIVET-LSRTS-QD---I----  |                                       |
|                                     | <i>Pectobacterium wasabiae</i>      | 261821375                            | -----VNERAK                             | GLEG -Q--VA--L--DVLS--LDRTA-QD---L----  |                                       |
|                                     | <i>Photobacterium profundum</i>     | 90411660                             | -----WM-VN-REA                          | GFAG -Q--VA--LN--VV-T-LDRTQ-QT---IL---- |                                       |
|                                     | <i>Photorhabdus asymbiotica</i>     | 253989953                            | -----W--VNERAA                          | GLEG -Q--A--LNA-VIDG-LSRT--QD---L----   |                                       |
|                                     | <i>Proteus mirabilis</i>            | 197284982                            | -----WM-VNEKAK                          | GIEG -Q--A--LTDNVNSIL-ATN-TD--LI----    |                                       |
|                                     | <i>Providencia stuartii</i>         | 188025998                            | -----WM-VNERAK                          | GLEG IQ--VA--LN-DVINQ-LERTE-AD---LL---- |                                       |
|                                     | <i>Pseudomonas syringae</i>         | 289650939                            | -----VNERAK                             | GPEG LQ--V--IP-DNLNVILDR---VD-----      |                                       |
|                                     | <i>Salmonella enterica</i>          | 161502985                            | -----VN-RAK                             | GLDG IT--VA--L-T-IVE-IL-RT--Q---MI----  |                                       |
|                                     | <i>Serratia proteamaculans</i>      | 157371021                            | -----WL-VN-RAA                          | GMEG -Q--A--L-A-VLE-IL-RTN-QS---L----   |                                       |
|                                     | <i>Shewanella amazonensis</i>       | 119774978                            | ---R---WM-VNNLAA                        | GVEG IQ--VA--LN-DIIEKII-RTK-AD---I----  |                                       |
|                                     | <i>Shigella boydii</i>              | 82543705                             | -----VNERAK                             | GLEG IN--VA--LNA-IIE-ILDRTA-QD--MI----  |                                       |
|                                     | <i>Vibrio cholerae</i>              | 121730021                            | -----WL-VN-LAA                          | GMEG IQ--VA--LT--IIQ-IIERTQ-QT---IL---- |                                       |
|                                     | <i>Xenorhabdus bovienii</i>         | 290475273                            | -----WM-VNNRAA                          | GLEG -Q--VA--L-A-VVEG-LSRTN-QD---L----  |                                       |
|                                     | <i>Yersinia pestis</i>              | 22126144                             | -----WL-VN-RAA                          | GLEG -Q--A--L-A-VLD-ILVATQ-ES---L----   |                                       |
|                                     | β-Proteobacteria                    | <i>Bordetella petrii</i>             | 163859168                               | -----VN-ASK                             | GREG LQ--V--NLHDAAL-E-LKRS-QS---I---- |
|                                     |                                     | <i>Polaromonas naphthalenivorans</i> | 121603698                               | -----W--VN-VSK                          | GREG LQ--V--NIHDAV-EILKRT--Q---L----  |
| <i>Achromobacter xylosoxidans</i>   |                                     | 317401441                            | -----VNEVAK                             | GRDG LQ--V--NLHDAAL-E--KRT--QD---I----  |                                       |
| <i>Herminiimonas arsenicoxydans</i> |                                     | 134096004                            | -----VNEKAK                             | GRDG LQ--V--NIHD-AL-KIEAT--QD--LI----   |                                       |
| <i>Achromobacter xylosoxidans</i>   |                                     | 338782313                            | -----VNEVAK                             | GRDG LQ--V--NLHDAAL-E--KRT--QD---I----  |                                       |
| <i>Alicyclophilus denitrificans</i> | 330823547                           | -----W--VNEAAK                       | GRDG LQ--V--NIHDAAI-EILKRT--QD--L-----  |                                         |                                       |

Figure S23

Partial sequence alignment of a conserved region in aspartyl-tRNA synthetase showing a 4 aa deletion that is commonly shared by all Xanthomonadales except *Rhodanobacter* sp. 2APBS1.
