# Supplementary material for: Phylogenomics and Molecular Signatures for Species from the Plant Pathogen-Containing Order Xanthomonadales
Source: PubMed Central journal article supplement (PMC3568101; doi:10.1371/journal.pone.0055216), 2013-02-08
Supplement: pone.0055216.s024.pdf [file pone.0055216.s024.pdf]

|                             |                              | 782                                             | 830                                                 |
|-----------------------------|------------------------------|-------------------------------------------------|-----------------------------------------------------|
| Xanthomonadales             | Stenotrophomonas maltophilia | 194366403                                       | PKSLLRHKLAVSTLDELANGEFQHLIGD ANADAKKVKRVVLCSGKVVYVD |
|                             | Stenotrophomonas sp. SKA14   | 254522086                                       | -----K---I-P DA--P-H---I-M-A-----                   |
|                             | Xylella fastidiosa           | 9106591                                         | -----E---D-Q---P -K--S-----                         |
|                             | Xanthomonas campestris       | 188992180                                       | -----S-E---D-Q---P -K--A-----                       |
|                             | Xanthomonas fuscans          | 294625477                                       | -----S-E---D-Q---P -K--A-R-----                     |
|                             | Xanthomonas axonopodis       | 77748592                                        | -----S-E---E-----P -K--A-----                       |
|                             | Xanthomonas oryzae           | 188577095                                       | -----S-K---D-----P SK-EP-----IA-----                |
|                             | Xanthomonas albilineans      | 285018444                                       | -----S-E---D-----P -K--A-----                       |
|                             | Xanthomonas vesicatoria      | 325914050                                       | -----S-E---E-----P -K--G-----                       |
|                             | Xanthomonas gardneri         | 325919392                                       | -----S-E---D-Q---P -K--A-----                       |
|                             | Xanthomonas perforans        | 325925702                                       | -----S-E-M-E-Q---P PK--P-----A-A-----               |
|                             | Pseudoxanthomonas spadix     | 357417263                                       | -----S-E-M-E-Q---P -S-----                          |
|                             | Pseudoxanthomonas suwonensis | 319787382                                       | -----S-LV-E H RALA-----                             |
|                             | Rhodanobacter sp. 2APBS1     | 352081385                                       | -----S-TV-DE V DQINKAD-T-L--G-----                  |
|                             | Acinetobacter haemolyticus   | 294651214                                       | -----P---K-E---E-T-NA-E I DAL-P-G----F-----         |
|                             | Aeromonas salmonicida        | 145299313                                       | -----P---SME-V-T-TV-E I DEL-P-----M-A-----          |
|                             | Aggregatibacter aphrophilus  | 251792222                                       | -----K-T-S-ED-H-T-HSVLD- L -DL-S--I---M-----        |
|                             | Alcanivorax borkumensis      | 110834357                                       | -----PM---S-E---E-K-HNV-E I DDI-P-N----M-----       |
|                             | Alteromonas macleodii        | 239993976                                       | -----P---S-E-----QV-SE V DSI-----                   |
|                             | Arsenophonus nasoniae        | 284007862                                       | -----P-T-S-----T-PA-E I DPLN--ID--LI-----           |
| Candidatus Regiella         | 304414842                    | -----E-T--ED--R-EMVLP- Q GKR--ES-----           |                                                     |
| Chromohalobacter salexigens | 92113343                     | -----P---S---A-PA-E V DEL-PQG----M-----         |                                                     |
| Citrobacter koseri          | 157146668                    | -----P-----A-PA-E V DEL-PQG----A-----           |                                                     |
| Cronobacter turicensis      | 260597124                    | -----P--T-----Q-PA-E I DEL-P-A-----             |                                                     |
| Dickeya dadantii            | 307130097                    | -----P--I-S-E---Q-S-PA-E I DPI-PQ-----M-----    |                                                     |
| Edwardsiella tarda          | 294637434                    | -----E---Q-Q-TV-PE I DQL-NNQ-T-L--G-----        |                                                     |
| Enhydrobacter aerosaccus    | 257453551                    | -----P---S-----T-LPA-E I DEL-P-G----M-----      |                                                     |
| Enterobacter cancerogenus   | 261341312                    | -----P---S-E---A-PA-E I DALE-S-----             |                                                     |
| Erwinia tasmaniensis        | 188534431                    | -----P---S-E---T-LPA-E I DEL-P-G----M-----      |                                                     |
| Escherichia coli            | 43019                        | -----P---S---I-T-TV-E I DELAP-D----M-----       |                                                     |
| Haemophilus influenzae      | 145633339                    | -----P---EM-D-DHG-NA-E I DDLNP-----F-----       |                                                     |
| Idiomarina loihiensis       | 56460609                     | -----P---SM-----T-MPA-E I DEL-PQA-----          |                                                     |
| Klebsiella pneumoniae       | 206575964                    | -----P---S---I-S-NV-E L D-I-P-Q-----M-----      |                                                     |
| Mannheimia haemolytica      | 254361862                    | -----P--I-S-S---D-T-NI-E I DTL-SAQ-----M-----F- |                                                     |
| Moritella sp. PE36          | 149911921                    | -----ST-----Q-T-LV-DE I DAL-SGQMR-II-----F-     |                                                     |
| Nitrococcus mobilis         | 88811364                     | -----P--I-----S-PA-E V DDL-PQG-----             |                                                     |
| Pantoea sp. aB              | 304395707                    | -----P---SM---I-K-NV-PE V DAL-P-Q-R--M-----     |                                                     |
| Pasteurella dagmatis        | 260914173                    | -----P--I-S-----S-PA-E V EEL-PAA-----           |                                                     |
| Pectobacterium atrosepticum | 50120300                     | -----P-CI-M-----T-AA-DE V DAL-PTQ-----F-----    |                                                     |
| Photobacterium damsela      | 269103075                    | -----P---S-----K-TV-E A DEL-P-D-----            |                                                     |
| Photorhabdus asymbiotica    | 253990448                    | -----P---S-----D-K-LPV-E L DELNPAD----M-----    |                                                     |
| Proteus mirabilis           | 197284466                    | -----P---SM-----S-PV-E I DEINP-D----M-----      |                                                     |
| Providencia alcalifaciens   | 212712445                    | -----I---ED---S-TV-PE I DSL-P--D-----           |                                                     |
| Pseudomonas aeruginosa      | 152984422                    | -----P-T-S-----T-LPA-E I DDL-P-A-----           |                                                     |
| Serratia proteamaculans     | 157369510                    | -----P---S-E---T-LPA-E I DEL-P-G----M-----      |                                                     |
| Shigella boydii             | 82543153                     | -----P-I-S-----SM-PA-E V DDI-PQG-----M-----     |                                                     |
| Sodalis glossinidius        | 85058854                     | -----P-CT--E---E-N-SA-PE I DAL-P-Q-----F-----F- |                                                     |
| Vibrio fischeri             | 59711430                     | -----P---S-----K-EPV-E I DAL-P-G-----           |                                                     |
| Xenorhabdus bovienii        | 290474111                    | -----P--T-S-----S-LPA-E I DEL-P-GI---M-----     |                                                     |
| Yersinia pestis             | 22126943                     |                                                 |                                                     |

Figure S24

Partial sequence alignment of a conserved region of 2-oxoglutarate-dehydrogenase E1 component showing a 1 aa deletion that is commonly present in subclade of Xanthomonadales except *Rhodanobacter* sp. 2APBS1
