# Supplementary material for: Phylogenomics and Molecular Signatures for Species from the Plant Pathogen-Containing Order Xanthomonadales
Source: PubMed Central journal article supplement (PMC3568101; doi:10.1371/journal.pone.0055216), 2013-02-08
Supplement: pone.0055216.s026.pdf [file pone.0055216.s026.pdf]

|  | 106                               | 164                          |
|--|-----------------------------------|------------------------------|
|  | DPLGLAAPVNTPLDGLPFHSLSDGDLNSEFSTG | GVGGQPRMKLRDLLARLKATYTGSGIG  |
|  | -----TT-----                      | -----                        |
|  | -----P-S-P---D-----N-QA-DN-----   | -I-----N--H-----DT--         |
|  | -----TP-I-P-----ES--G-----        | -L-----                      |
|  | -----TP---P-----QA-MD-----        | -----K-----AST--             |
|  | -----VP---P---D-----QA-D-----     | -----K---T-----AS---         |
|  | -----VP---P---D-----QA-D-----     | -----K---T-----AS---         |
|  | -----TP---P---D-----QA-MD-----    | -----K---T-----AS---         |
|  | -----VP---P---D-----QA-D-----     | -----K---T-----AS---         |
|  | -----TP---P---D-----QA-D-----     | -----K-----AS---             |
|  | -----TP---P---D-----QA-MD-----    | -----K-----AST--             |
|  | -----TP-M-P-----E-----ER-DA-----  | -LA-----                     |
|  | -----SE---P-----EW-T-ER-D-----    | --A---V-----                 |
|  | -----TEKMPA-----A-G--A--DT--D--   | N YA--GQ-L--E--SH-QK--AST--  |
|  | -----W-RETVAE-DPA--N-QGA-MEAT-NV- | S YAI-RET-V-S--Y-S--K--C---  |
|  | -----IMEREAV---E-AH-G-TA--DTV-Q-- | N LFI-K-ETS--IVDC-TS--CS-V-  |
|  | -----WKQERVR--E-SH---EQ-FD-V-NV-  | S YAI-KDS-P-GE-FKS-NR--C---  |
|  | -----WEREPV---N-AY-D-TEF-FENS-NI- | S FAIPKKT-T-A--YTA--K--C---  |
|  | -----MQRDPV---D-S--G-TNA--DTV---  | S LFI-KEEAT--EIVEA-EK--C-H-- |
|  | -----WEQE-VA--DPS--D-TEA-FQES-NV- | S FAI-KET--GE-ISA--Q--C-P--  |
|  | -----WQRDKVR--Q-SH-D--EN-FDK-YNV- | S FAI--DT---G--YKA-RN--C---  |
|  | -----WQQERVA--DPA--D-TEA-FQET-NV- | S FAL-KET---G--IEA--Q--C---  |
|  | -----WKQERV---D-AY-N-TEQ--DET-NV- | S FAI-RDT-R-GE-Y-A--Q--C-P-- |
|  | -----WQQERVA--DPA--D-TEA-FQET-NV- | S FAI-KDT---GE-IDA--Q--C---  |
|  | -----WKQEPVA--DPGY-G--A-FQES-NV-  | S FAI-KET---A--Y-A--Q--C---  |
|  | -----WQQEKVA--DPS--D-TEA-FQET-NV- | S FAS-KET--GE--EA--Q--C-P--  |
|  | -----RS-TPV---D-S--Q--QS--DT--Q-- | S FFL-ADKAP-KEIVEA-QQ--CR--- |
|  | -----WKQEEV---S-A--D-TKD--DR--NV- | S LAV-SET---K-IHKA-EDI-C-P-- |
|  | -----WKQERVA--DPAY-D-TEA-FQDSYNV- | S FAI-KDT---G--I-A--Q--C---  |
|  | -----MQREPV---D-R--E--EA-YDTV-QL- | S LFF-PEEAP---IV-D--K--CSTV- |
|  | -----WKQDRVA--DPA--D-TEA-FQES-NV- | S FAI-KDT---A--FQA-TQ--C---  |
|  | -----WEQERVLE-APE--N-TED-F-ES-NV- | S FAV--ET---SEIY-A--K--C---  |
|  | -----WKQD-V---DPA--N-TEA-FAET-NV- | S FAI-KET---A--YEA--R--C---  |
|  | -----WKRESV---DPA--N-TKE-FEET-NV- | S FAI-KET---G-IYEA--RI-C---  |
|  | -----WKREAV---DPT--N-TKE-FDET-NV- | S FAI-KET---SE-YEH--RI-C---  |
|  | -----VENAKVK--DPFY-E-EGE-FDAS-NV- | S Y-A-NE--I-K--TS--S--C-TL-  |
|  | -----QIHEYVAE-EPA--N-T-E-FSET-NV- | S FAS--ET---S--YDA-RS--C--V- |
|  | -----WKQEPV---DPA--N-TKA-FEET-NV- | S FAI-KETL--A--YDA--RI-C---  |
|  | -----WKQESV---DPAY-H-TEA-FQNT-NV- | S FAI-KET---S--YTA--Q--C---  |

Xanthomonadales

Other Bacteria

Figure S26

Partial sequence alignment of a conserved region in 2-oxoglutarate-dehydrogenase E1 component showing a 1 aa deletion that is uniquely shared by all Xanthomonadales except *Rhodanobacter* sp. 2APBS1
