# Supplementary material for: Phylogenomics and Molecular Signatures for Species from the Plant Pathogen-Containing Order Xanthomonadales
Source: PubMed Central journal article supplement (PMC3568101; doi:10.1371/journal.pone.0055216), 2013-02-08
Supplement: pone.0055216.s027.pdf [file pone.0055216.s027.pdf]

|                           |                              | 404                      |                            | 445               |
|---------------------------|------------------------------|--------------------------|----------------------------|-------------------|
|                           | Xanthomonas albilineans      | 285018780                | RVPFLDVEFLEVAMRMDAQHKMAGTR | ADGSK RIEKAVLREAF |
|                           | Xanthomonas campestris       | 289670204                | -----R---D-----SF--IDKT    | SS-AT -M--G-----  |
|                           | Xanthomonas oryzae           | 166712717                | -----R---D-----SF--IDKT    | SS-AA -M--G-----  |
|                           | Xanthomonas fuscans          | 294665428                | -----R---D-----RF--IDKT    | SS-AT -M--G-----  |
|                           | Xanthomonas axonopodis       | 21242186                 | -----R---D-----RF--IDKT    | SS-AT -M--G-----  |
|                           | Xanthomonas perforans        | 325928403                | -----R---D-----RF--IDKT    | SG-AT -M--G-----  |
|                           | Xanthomonas campestris       | 78047046                 | -----R---D-----RF--IDKT    | SG-AA -M--G-----  |
| Xanthomonadales           | Xanthomonas gardneri         | 325921718                | -----R---D-----SF--IDKT    | SG-AM -M--G-----  |
|                           | Xanthomonas vesicatoria      | 325913967                | -----R---D-----SF--IDKT    | ST-AT -M--G---Q-- |
|                           | Xylella fastidiosa           | 71275914                 | -----R---D-----VDKT        | SN-PQ -M--GI--A-- |
|                           | Pseudoxanthomonas spadix     | 357417890                | -----R---D-----S---ITVG    | ---K- -M--G-----  |
|                           | Pseudoxanthomonas suwonensis | 319786523                | -----R---D-----KY--VLKG    | S--PQ -M--GI--Q-- |
|                           | Stenotrophomonas sp. SKA14   | 254525303                | -----R---D---F--A---V-AG   | F-GR -M--G-----   |
|                           | Stenotrophomonas maltophilia | 194365058                | -----R---D---F--A---V-AG   | F-GR -M--G-----   |
|                           | Rhodanobacter sp. 2APBS1     | 352081994                | -----L--ID---GL--A---QK    | -----             |
|                           | Aeromonas hydrophila         | 117619348                | -----K--MD---LQPAD--C-KG   | K---HI-----       |
|                           | Aeromonas salmonicida        | 145299448                | -----K--MD---LQPAD--C-NG   | K---HI-----       |
|                           | Aliivibrio salmonicida       | 209694406                | -----K--ID---LNP-D--C-NG   | KM--HI---C-       |
|                           | Citrobacter youngae          | 283834038                | -----KK--D---INP-D--C-NG   | KM--H---C-        |
|                           | Colwellia psychrerythraea    | 71278785                 | -----KN-MD---INPED-LC-NG   | KM---I---S-       |
|                           | Cronobacter sakazakii        | 156934825                | -----KK--D---INP-D--C-NG   | KM--HI---C-       |
|                           | Dickeya dadantii             | 271499720                | -----KK--D---INPKD--C-NG   | KM--HI---C-       |
| Edwardsiella tarda        | 269139968                    | -----KA--D---LNPRD--C-SG | ---QL---C-                 |                   |
| Enterobacter cancerogenus | 261341276                    | -----KK--D---INP-D--C-NG | KM--HI---C-                |                   |
| Escherichia albertii      | 170767928                    | -----KK--D---INP-D--C-NG | KM--HI---C-                |                   |
| Escherichia coli          | 110640885                    | -----KK--D---INP-D--C-NG | KM--HI---C-                |                   |
| Klebsiella pneumoniae     | 206575898                    | -----KK--D---INP-D--C-NG | KM--H---C-                 |                   |
| Other Bacteria<br>(0/500) | Moritella marina             | 6691648                  | -----K--VDAS--LNPEL--ITGD  | ---NII---         |
|                           | Moritella sp. PE36           | 149909581                | -----K--IDT---LNPEL--ITGD  | ---NII---         |
|                           | Pectobacterium atrosepticum  | 50120262                 | -----KN--D---INPRD--C-NG   | KM--HI---C-       |
|                           | Photobacterium profundum     | 54308220                 | -----K--D---INPED--C-NG    | KM--HI---C-       |
|                           | Psychromonas ingrahamii      | 119944862                | -----K--MD---TNPEL--IKDG   | ---NI---          |
|                           | Salmonella enterica          | 167553960                | -----KK--D---INP-D--C-NG   | KM--H---C-        |
|                           | Shewanella sediminis         | 157374977                | -----K--MD---INPEA--SKDG   | K---HI---Q--      |
|                           | Shigella sonnei              | 74311201                 | -----KK--D---INP-D--C-NG   | KM--HI---C-       |
|                           | Sodalis glossinidius         | 85058791                 | -----KQ--D---INP-D--C-NG   | K---H---C-        |
|                           | Tolomonas auensis            | 237808953                | -----K--MD---LNPKD--C-NG   | K---HIV--T-       |
|                           | Vibrio alginolyticus         | 91225923                 | -----K--ID---LNPAD--C-NG   | KM--HI---C-       |
|                           | Vibrio cholerae              | 147673054                | -----K--ID---LNPAD--C-NG   | KM--HI---C-       |
|                           | Yersinia pestis              | 22125101                 | -----KN--D---INP-D--C-NG   | KM--HI---C-       |

**Figure S27**

Partial sequence alignment of a conserved region of asparagine synthase b protein that is showing a 4-5 aa insert, uniquely shared by all Xanthomonadales except *Rhodanobacter* sp. 2APBS1. The species belonging to *Stenotrophomonas* can also be separated from other Xanthomonadales because of having only 4 aa insert at the same position.
