# Supplementary material for: Phylogenomics and Molecular Signatures for Species from the Plant Pathogen-Containing Order Xanthomonadales
Source: PubMed Central journal article supplement (PMC3568101; doi:10.1371/journal.pone.0055216), 2013-02-08
Supplement: pone.0055216.s028.pdf [file pone.0055216.s028.pdf]

|                        |                              | 96             |                        | 132                    |
|------------------------|------------------------------|----------------|------------------------|------------------------|
| Stenotrophomonas       | Stenotrophomonas maltophilia | 194365058      | LAFQTGSDCEVINALYRQG    | GT PAQWLEQLNGIFAFALWD  |
|                        | Stenotrophomonas sp. SKA14   | 254525303      | -----                  | -S-----                |
| Xanthomonadales        | Xanthomonas campestris       | 21230846       | -----ED                | A --SY-NR-----         |
|                        | Xanthomonas fuscans          | 294665428      | -----ED                | - --SY-NR-----         |
|                        | Xanthomonas axonopodis       | 21242186       | -----ED                | - --SY-NR-----         |
|                        | Xanthomonas oryzae           | 166712717      | -----ED                | A -DSY-NR-----         |
|                        | Xanthomonas albilineans      | 285018780      | -----EQ                | A -VAL-DR-----         |
|                        | Xylella fastidiosa           | 15836723       | ----H-----             | - --TSF-NR-----        |
|                        | Pseudoxanthomonas spadix     | 357417890      | -----ED                | A -ESF-NR-----         |
|                        | Pseudoxanthomonas suwonensis | 319786523      | ----A-----             | E --SF-NR-----         |
|                        | Rhodanobacter sp. 2APBS1     | 352081994      | ---T-----              | EQ GSDFVGK-----        |
|                        | Aeromonas hydrophila         | 117619348      | ----H-----LL---        | KEK GPAF-DD-----I-Y-   |
|                        | Aeromonas salmonicida        | 145299448      | ----H-----LL---        | KEK GPAF-DD-----I-Y-   |
|                        | Aliivibrio salmonicida       | 209694406      | ----D-----L---         | DK G-DL--D-----I-Y-    |
|                        | Alteromonas macleodii        | 239996399      | ---K-R-----LP-FQ-K     | GIDFIDE-E-M---I-Y-     |
|                        | Candidatus Hamiltonella      | 238899130      | ----D-----L---         | QK GEPF-DE-Q-M-T-I-Y-  |
| Citrobacter koseri     | 157146724                    | -----L---      | QEK GVEF-DD-Q-M---Y-   |                        |
| Cronobacter turicensis | 260597080                    | -----L---      | QEK GPEF-DE-Q-M---V-Y- |                        |
| Dickeya dadantii       | 271499720                    | -----L---      | QEK GPEF-DE-R-M---Y-   |                        |
| Edwardsiella ictaluri  | 238920794                    | -----L---      | QEY GPDF-D--R-M---I-Y- |                        |
| Enterobacter cloacae   | 296103380                    | -----L---      | QEK GPEF-DD-Q-M---Y-   |                        |
| Erwinia tasmaniensis   | 188534462                    | ----D-----L--- | QEK GVDF-DD-Q-M---I-Y- |                        |
| Escherichia albertii   | 170767928                    | -----L---      | QEK GPEF-DD-Q-M---Y-   |                        |
| Escherichia coli       | 110640885                    | -----L---      | QEK GPEF-DD-Q-M---Y-   |                        |
| Klebsiella pneumoniae  | 206575898                    | -----L---      | QEK GPEF-DD-Q-M---Y-   |                        |
| Other Bacteria         | Moritella marina             | 6691648        | ----E-----L---         | KEK GT-F-DD-----Y-     |
|                        | Moritella sp. PE36           | 149909581      | ----E----I-L---        | KEK GT-F-DD-----Y-     |
|                        | Pantoea sp. At-9b            | 258639664      | -----L---              | QEK GVDF-DD-Q-M---I--- |
|                        | Pectobacterium atrosepticum  | 50120262       | -----L---              | QEK GPEF-DE-R-M---Y-   |
|                        | Photobacterium profundum     | 90411576       | ----E----I-L---        | KEK GPEL-DY----G-I-Y-  |
|                        | Pseudoalteromonas atlantica  | 109899262      | ---R-K-----LP-E-Q      | GVEFID--Q-M--V-Y-      |
|                        | Psychromonas ingrahamii      | 119944862      | ---K-K----I-L---       | EEK GCDF-DD-----C-Y-   |
|                        | Salmonella enterica          | 167553960      | -----L---              | QEK GPDF-DD-Q-M---Y-   |
|                        | Serratia odorifera           | 270263726      | ----A-----L---         | QEK GIDF-DD-Q-M---Y-   |
|                        | Shewanella amazonensis       | 119775236      | --Y--N-----L---        | QEY GSDF-DK-----V-Y-   |
|                        | Shigella sonnei              | 74311201       | -----L---              | QEK GPEF-DD-Q-M---Y-   |
|                        | Tolumonas auensis            | 237808953      | -----L---              | KEK GTAF-DD-S----I-Y-  |
|                        | Vibrio alginolyticus         | 91225923       | ----D-----L---         | QDM G-DL--E-----V-Y-   |
|                        | Vibrio cholerae              | 297578599      | ----D-----L---         | DK G-DL--E-----V-Y-    |
|                        | Yersinia enterocolitica      | 123443198      | -----L---              | QEK GPEF-DD-Q-M---V-Y- |
|                        | Yersinia pestis Angola       | 162420654      | -----L---              | QEK GPAF-DD-Q-M---V-Y- |

**Figure S28**

Partial sequence alignment of a conserved region of Asparagine synthase b protein showing a 1-2 aa insert that is uniquely shared by all Xanthomonadales except *Rhodanobacter* sp. 2APBS1. While genus *Stenotrophomonas* can be differentiated from other Xanthomonadales because of having 1 aa insert instead of 2 aa.
