# Supplementary material for: Phylogenomics and Molecular Signatures for Species from the Plant Pathogen-Containing Order Xanthomonadales
Source: PubMed Central journal article supplement (PMC3568101; doi:10.1371/journal.pone.0055216), 2013-02-08
Supplement: pone.0055216.s029.pdf [file pone.0055216.s029.pdf]

|                               |                              | 522                          |                              | 576                    |
|-------------------------------|------------------------------|------------------------------|------------------------------|------------------------|
|                               | Xylella fastidiosa 9a5c      | 77747494                     | TRNAGKHAGGVVIAPNPLTEFCPLFAEH | DENG                   |
|                               | Xylella fastidiosa M12       | 170729407                    | -----                        | -----                  |
|                               | Xylella fastidiosa Dixon     | 71276388                     | -----                        | -----                  |
|                               | Xylella fastidiosa Ann-1     | 71900814                     | -----                        | -----                  |
|                               | Xylella fastidiosa Temecula1 | 28198096                     | -----                        | -----                  |
| Xanthomonadales               | Xanthomonas oryzae           | 353462904                    | -----E--S-----               | --D- -----D---A-----   |
|                               | Xanthomonas vesicatoria      | 325916626                    | -----E--S-----               | --D- -----D---A-----   |
|                               | Xanthomonas campestris       | 289662892                    | -----E--S-----               | --D- -----D---A-----   |
|                               | Xanthomonas axonopodis       | 346724307                    | -----D--S-----               | --D- -----D---A-----   |
|                               | Xanthomonas fuscans          | 294625959                    | -----D--S-----               | --D- -----D---A-----   |
|                               | Xanthomonas perforans        | 325929585                    | -----D--S-----               | --D- -----D---A-----   |
|                               | Xanthomonas gardneri         | 325923963                    | -----E--S-----               | --G- ---Q---D---A----- |
|                               | Xanthomonas albilineans      | 285018805                    | -----T--SD-----              | -VDH L-----D---Q-----  |
|                               | Stenotrophomonas sp. SKA14   | 254524078                    | -----G-E-S-----Y---          | -----L-----            |
|                               | Stenotrophomonas maltophilia | 194365029                    | -----G-E-S-----Y---          | -----L-----            |
|                               | Pseudoxanthomonas suwonensis | 319787804                    | -----T--HT-----              | -HD- L-R-----          |
|                               | Pseudoxanthomonas spadix     | 357417821                    | -----S--SD-----              | --GT -R-----D---A----- |
|                               | Rhodanobacter sp. 2APBS1     | 352086322                    | -----S--D-A--YC-A            | G-GGV---Y--D---A-----  |
|                               | Alcanivorax borkumensis      | 110834019                    | ---V-----GK--D-A--YC-E       | D-T-L---Y--D---SA----- |
|                               | Alteromonas macleodii        | 196156206                    | -----TTI--D-S--YCDD          | E-N-----TA-----        |
|                               | Arsenophonus nasoniae        | 284008505                    | -----TKI--D-A--YCDP          | E-Q--L-----YA-----     |
|                               | Citrobacter koseri           | 157147384                    | -----TKI--D-A--YCDE          | A-QH-----YA-----       |
|                               | Coxiella burnetii            | 212212283                    | -----TK--D-V--YS-P           | GSDHV-----D---A-----   |
|                               | Enterobacter cancerogenus    | 261338818                    | -----TKI--D-A--YCDE          | A-HH-----YA-----       |
|                               | Erwinia tasmaniensis         | 188533052                    | -----TQI--D-A--YCDE          | H-NH-----YA-----       |
| Escherichia coli              | 19548812                     | -----TKI--D-A--YCDE          | E--H-----S---YA-----         |                        |
| Idiomarina baltica            | 85713117                     | -----S--TTI--D-AA-YCDD       | E-----SA-----                |                        |
| Klebsiella pneumoniae         | 262044745                    | -----TKI--D-A--YCDE          | Q-LH-----YA-----             |                        |
| Methylophaga thiooxidans      | 254491862                    | ---V-----KV--YT--YC--        | N-AGL-S---D---S-----         |                        |
| Nitrosococcus halophilus      | 292492697                    | -----KK--YV--YYC-Q           | GASGV-----D-I-AI-----        |                        |
| Pantoea ananatis              | 291616361                    | -----TKI--D-A--YCDE          | N-QY-----YA-----             |                        |
| Photorhabdus luminescens      | 37524688                     | -----TKI--D-S--YCDP          | E-L-----YA-----              |                        |
| Proteus mirabilis             | 227357235                    | -----S--TKI--D-A--YCDP       | E-N-----YA-----              |                        |
| Providencia rettgeri          | 291326493                    | -----TKI--D-A--YCDA          | E-N-----YA-----              |                        |
| Salmonella enterica           | 161504650                    | -----TKI--D-A--YCDE          | E--H-----S---YA-----         |                        |
| Serratia odorifera            | 293394718                    | -----TKI--D-A--YCDA          | E-NH-----YA-----             |                        |
| Shewanella amazonensis        | 119774291                    | -----TKI--D-S--YCDA          | E-----YA-----                |                        |
| Shigella boydii               | 82542783                     | -----TKI--D-A--YCDE          | E--H-----S---YA-----         |                        |
| Sodalis glossinidius          | 85059906                     | -----TKI--D-A--YCDG          | E-NH-----YA-----             |                        |
| Vibrio parahaemolyticus       | 254508656                    | -----S--TTI--D-A--IY-DA      | E-HF-----TA-----             |                        |
| Xenorhabdus nematophila       | 300724779                    | -----TKI--D-A--IYCDP         | E-Q-----YA-----              |                        |
| Yersinia pestis               | 167471052                    | -----TKI--D-A--YCDA          | E-N-----YA-----              |                        |
| Nitrobacter hamburgensis      | 92117240                     | --H-ST--A-I--GDR--S-LV--YRDP | KSDM----NMKW--PA-----        |                        |
| Bradyrhizobium japonicum      | 27379977                     | --H-ST--A-I--GDR--S-LV--YRDP | KSDM----NMKW--PA-----        |                        |
| Ralstonia pickettii           | 241663600                    | ---V-M----L--GK--D---YTQG    | -EDAGV-S-Y--D---A-----       |                        |
| Methyloversatilis universalis | 334132599                    | --GV-M----L--GK--D---YQQD    | -DDAS--S---D---AI-----       |                        |
| Pusillimonas sp. T7-7         | 332283756                    | ---I-M----L--GK--D---YCQP    | -VDTSA-S---D---AA-----       |                        |
| Bordetella avium              | 187478729                    | ---I-M----L--GK--D---YCQP    | -QENYA-S---D---AA-----       |                        |
| Thauera sp. MZ1T              | 217970003                    | S--V-M----L--GK--D---YIAD    | -DDAT--S---D---A-----        |                        |
| Aromatoleum aromaticum        | 56477932                     | S--V-M----L--GK--D---YIAD    | -DEAT--S---D---A-----        |                        |
| Chromobacterium violaceum     | 34496366                     | --GI-M----L--GR--D---YIAS    | -D-AS--S---D---QI-----       |                        |

Figure S29

Partial sequence alignment of a conserved region DNA polymerase III subunit alpha showing a 4 aa insert that is commonly shared by all Xanthomonadales except *Rhodanobacter* sp. 2APBS1. This signature was previously identified by (Cutino-Jimenez et al., 2010) and was described as all Xanthomonadales specific Signature.
