# Supplementary material for: Phylogenomics and Molecular Signatures for Species from the Plant Pathogen-Containing Order Xanthomonadales
Source: PubMed Central journal article supplement (PMC3568101; doi:10.1371/journal.pone.0055216), 2013-02-08
Supplement: pone.0055216.s030.pdf [file pone.0055216.s030.pdf]

|                               |                              | 172                         | MP                              | 238                                 |                  |
|-------------------------------|------------------------------|-----------------------------|---------------------------------|-------------------------------------|------------------|
| Xanthomonadales               | Xylella fastidiosa 9a5c      | 15836728                    | QALRKL TGNIKRSNTLVIFINQLRMKIGVM | GQSPETTTGGNALKFYASVRLDIRRIGAIKKGDEI |                  |
|                               | Xylella fastidiosa Dixon     | 71275910                    | -----I-                         | -----                               |                  |
|                               | Xylella fastidiosa M12       | 170729337                   | -----I-                         | -----                               |                  |
|                               | Xylella fastidiosa Temecula1 | 28198030                    | -----I-                         | -----                               |                  |
|                               | Stenotrophomonas maltophilia | 190573723                   | -----                           | -----                               |                  |
|                               | Stenotrophomonas sp. SKA14   | 254524001                   | -----                           | -----                               |                  |
|                               | Xanthomonas albilineans      | 285017962                   | -----V-                         | -----                               |                  |
|                               | Xanthomonas oryzae           | 2460018                     | -----V-                         | -----V-                             |                  |
|                               | Xanthomonas vesicatoria      | 325916032                   | -----V-                         | -----V-                             |                  |
|                               | Xanthomonas campestris       | 289669642                   | -----V-                         | -----V-                             |                  |
|                               | Xanthomonas gardneri         | 325924502                   | -----V-H-                       | -----V-                             |                  |
|                               | Xanthomonas axonopodis       | 21242489                    | -----V-                         | -----V-                             |                  |
|                               | Xanthomonas fuscans          | 294626629                   | -----V-                         | -----V-                             |                  |
|                               | Pseudoxanthomonas suwonensis | 319786626                   | -----H-                         | -----S-                             |                  |
|                               | Pseudoxanthomonas spadix     | 357417030                   | -----                           | -----V-                             |                  |
|                               | Rhodanobacter sp. 2APBS1     | 352081858                   | -----A--K-GC-----I-             | FG-----V--E--                       |                  |
|                               | Other Bacteria<br>(0/500)    | Pseudoalteromonas atlantica | 109899564                       | -----I-                             | FG-----D--V      |
|                               |                              | Nitrosococcus watsonii      | 300113490                       | -----A-----I-                       | FG-----V--L----- |
|                               |                              | Methylomonas methanica      | 333985518                       | -----A-----                         | FGN-----V        |
|                               |                              | Methylobacter tundripaludum | 344943375                       | -----I-                             | FG-----S---E-V   |
| Legionella pneumophila        |                              | 464597                      | -----A-----I-                   | FG-----S---E--                      |                  |
| Dichelobacter nodosus         |                              | 146328886                   | -----A--V--I-                   | FG-----M-----S-E--V                 |                  |
| Vibrio harveyi                |                              | 213012346                   | --M-----L-Q--CMC-----I-         | FGN-----T---E--V                    |                  |
| Pseudomonas putida            |                              | 18076865                    | -----I--NA-C-----I-             | FG-----T--V-E--V                    |                  |
| Gallionella capsiferriformans |                              | 302877752                   | -----A-----                     | FGN-----V                           |                  |
| Methylotenera mobilis         |                              | 253997269                   | -----T-----I-                   | FGN-----T-----                      |                  |
| Dechloromonas aromatica       |                              | 71909761                    | -----A--KT-----I-               | FG-----V                            |                  |
| Lutiella nitroferrum          |                              | 224825851                   | -----T-----I-                   | FG-----G---E--                      |                  |
| Cupriavidus sp. mapud3.4      |                              | 304334137                   | -----T--T-C-----I-              | FG-----S---DV                       |                  |
| Laribacter hongkongensis      |                              | 226939722                   | -----T-----I-                   | FGN-----T---                        |                  |
| Cupriavidus sp. mapud10.1     |                              | 304334135                   | -----T--T-C-----I-              | FG-----S---DV                       |                  |
| Methylotenera versatilis      |                              | 297539361                   | -----T--M-----I-                | FGN-----T---V                       |                  |
| Chromobacterium violaceum     |                              | 61097689                    | -----T-----I-                   | FGN-----T-G---V                     |                  |
| Methylomonas clara            |                              | 132226                      | -----T-----I-                   | FGN-----S-----T---V                 |                  |
| Neisseria mucosa              |                              | 2500090                     | -----H--T---V--I-               | FG-----T-Q---DV                     |                  |
| Chromobacterium piscinae      |                              | 61097707                    | -----T-----I-                   | FGN-----T-G---E-V                   |                  |
| Chromobacterium violaceum     |                              | 61097691                    | -----T-----I-                   | FGN-----T-G---E-V                   |                  |
| Ralstonia solanacearum        |                              | 83746096                    | -----T--T-C-----I-              | FG-----S--R--V                      |                  |
| Neisseria flavescens          |                              | 2500089                     | -----H--T---V--I-               | FG-----T-Q---DV                     |                  |
| Burkholderia sp. JPY157       | 262112670                    | -----T--T-C-----I-          | FGN-----S--N--V                 |                                     |                  |
| Ralstonia solanacearum        | 300692434                    | -----T--T-C-----I-          | FG-----S--R--V                  |                                     |                  |

**Figure S30**

Partial sequence alignment of a conserved region of RecA showing a 2 aa insert that is commonly shared by all Xanthomonadales except *Rhodanobacter* sp. 2APBS1. This signature was previously identified by (Cutino-Jimenez et al., 2010) and was described as all Xanthomonadales specific Signature.
