# Supplementary material for: Phylogenomics and Molecular Signatures for Species from the Plant Pathogen-Containing Order Xanthomonadales
Source: PubMed Central journal article supplement (PMC3568101; doi:10.1371/journal.pone.0055216), 2013-02-08
Supplement: pone.0055216.s031.pdf [file pone.0055216.s031.pdf]

|                             |                                | 765           | EGGLS                | 806                  |
|-----------------------------|--------------------------------|---------------|----------------------|----------------------|
| Xanthomonadales             | Xylella fastidiosa 9a5c        | 15838317      | LFATHYFELTALADETY    | GIANVHFDVAEHSERLVFMH |
|                             | Xylella fastidiosa Dixon       | 71275401      | -----                | -----                |
|                             | Xylella fastidiosa Ann-1       | 71901697      | -----                | -----                |
|                             | Xylella fastidiosa M23         | 182681688     | -----E---            | -----                |
|                             | Xylella fastidiosa Temecula1   | 28198974      | -----E---            | -----                |
|                             | Xanthomonas oryzae pv. oryzae  | 58581265      | -----SH              | D--A- L---G-----     |
|                             | Xanthomonas campestris pv. vas | 289662777     | -----SH              | A--A- L---G-----     |
|                             | Xanthomonas gardneri ATCC 1986 | 325919899     | -----SH              | A--A- L---G-----     |
|                             | Xanthomonas axonopodis pv. cit | 346724192     | -----SH              | A--A- L---G-----     |
|                             | Xanthomonas perforans 91-118   | 325924847     | -----SH              | A--A- L---G-----     |
|                             | Xanthomonas vesicatoria ATCC 3 | 325915949     | -----SH              | A--A- L---G-----     |
|                             | Xanthomonas albilineans GPE PC | 285018993     | -----PV              | ---P- L---GD-----    |
|                             | Xanthomonas fuscans subsp. aur | 294664088     | -----ASH             | A--A- L---G-----     |
|                             | Stenotrophomonas maltophilia J | 344206568     | -----QH              | ---R- L---G-A----    |
|                             | Stenotrophomonas sp. SKA14     | 254522797     | -----QH              | ---R- L---G-A----    |
|                             | Pseudoxanthomonas spadix BD-a5 | 357417002     | -----S-SF            | ---P- L---GHT----    |
|                             | Pseudoxanthomonas suwonensis 1 | 319786617     | -----S--TPES         | -----L---GDS-----    |
|                             | Rhodanobacter sp. 2APBS1       | 352081856     | -----E--N-FA         | A-----L----          |
|                             | Cellvibrio japonicus           | 192360641     | -----I-S-PETVP       | --V---LN-T--QDKI--L- |
|                             | Citrobacter youngae            | 283835500     | -----Q-PEKME         | -V---L--L--GDTIA--   |
|                             | Colwellia psychrerythraea      | 71282195      | -----L--GQIS         | TL---L--M--DDNI---   |
|                             | Escherichia coli               | 21951852      | -----Q-PEKME         | -V---L--L--GDTIA--   |
|                             | Haemophilus influenzae         | 45645383      | -----PEQLE           | ----I-L-L--NNTIA--   |
| Halorhodospira halophila    | 121998436                      | -----M--EQIHP | -VV---LE-A--G--I--L- |                      |
| Marinobacter algicola       | 149374515                      | -----Q--DLE   | HAV---LT-T--DDTI--L- |                      |
| Methylococcus capsulatus    | 53805175                       | -----E-CE     | DVG---L---GDKV--L-   |                      |
| Nitrosococcus watsoni       | 300113486                      | -----PEHLD    | -V--L-LT-T--K--I--L- |                      |
| Oceanospirillum sp. MED92   | 89092115                       | -----S-P-QAA  | NVF---LT---NDHI--L-  |                      |
| Pseudoalteromonas atlantica | 109899568                      | -----G--ALP   | EL---L---G-SIR---    |                      |
| Psychromonas ingrahamii     | 119946988                      | -----K-PENIP  | ELV---L---GDAIA-L-   |                      |
| Salmonella enterica         | 21951842                       | -----Q-PEKME  | -V---L--L--GDTIA--   |                      |
| Shewanella woodyi           | 170727679                      | -----Q-PELIS  | NV---L--I--GDTI---   |                      |
| Shigella dysenteriae        | 82778101                       | -----Q-PEKME  | -----L--L--GDTIA--   |                      |
| Tolumonas auensis           | 237809472                      | -----Q--EQQA  | N-V-----I--GDSVA--   |                      |
| Yersinia aldovae            | 238758208                      | -----T-PEKME  | -VV---L--M--G-TIA--  |                      |
| Yersinia mollaretii         | 238797129                      | -----T-PEKME  | -VV---L--L--G-TIA--  |                      |

Figure S31

Partial sequence alignment of a conserved region of MutS showing a 5 aa insert that is commonly shared by all Xanthomonadales except *Pseudoxanthomonas suwonensis* and *Rhodanobacter* sp. 2APBS1. This signature was previously identified by (Cutino-Jimenez et al., 2010) and was described as all Xanthomonadales specific Signature.
