# Supplementary material for: Phylogenomics and Molecular Signatures for Species from the Plant Pathogen-Containing Order Xanthomonadales
Source: PubMed Central journal article supplement (PMC3568101; doi:10.1371/journal.pone.0055216), 2013-02-08
Supplement: pone.0055216.s032.pdf [file pone.0055216.s032.pdf]

|                             |                              | 65                                                          | 120                                                         |                                                            |
|-----------------------------|------------------------------|-------------------------------------------------------------|-------------------------------------------------------------|------------------------------------------------------------|
| Xanthomonadales             | Stenotrophomonas maltophilia | 194365029                                                   | KFYKAAEGVGIKPIAGADVLIAEEGQD PWRMTLLCRDREGYLSLSRLLTRAWMEG    |                                                            |
|                             | Stenotrophomonas sp. SKA14   | 254524078                                                   | -----                                                       |                                                            |
|                             | Xanthomonas oryzae           | 166712747                                                   | -----M--TPDMT-----                                          |                                                            |
|                             | Xanthomonas axonopodis       | 21242159                                                    | -----M--TPDMT-----                                          |                                                            |
|                             | Xanthomonas campestris       | 188992333                                                   | -----M--TPDMT-----                                          |                                                            |
|                             | Xanthomonas fuscans          | 294625959                                                   | -----M--TPDMT-----                                          |                                                            |
|                             | Xanthomonas albilineans      | 285018805                                                   | -----L--DGS-A---L--                                         |                                                            |
|                             | Xanthomonas perforans        | 325929585                                                   | -----M--TPDMT-----                                          |                                                            |
|                             | Xanthomonas vesicatoria      | 325916626                                                   | -----M--TPDMT-----                                          |                                                            |
|                             | Xanthomonas gardneri         | 325923963                                                   | -----M--TPDMT-----                                          |                                                            |
|                             | Xylella fastidiosa           | 71898629                                                    | -----T-----S--L---PEHT--G-----HT---N--Q-IS-G-L--            |                                                            |
|                             | Pseudoxanthomonas spadix     | 357417821                                                   | -Y---C-A-----S-V--DGT--SI-----HS---T-----L--                |                                                            |
|                             | Pseudoxanthomonas suwonensis | 319787804                                                   | -----C-A-----V-----LM--SSPGE[A]-----A-V--HG---N-----        |                                                            |
|                             | Rhodanobacter sp. 2APBS1     | 352086322                                                   | -----CSAA-----G-C-LWM-APDDP[R]---L---QH-A---N---VS---Q--    |                                                            |
|                             | Acidithiobacillus            | 255020984                                                   | ---Q--REA-V-A-I-SE-WLCPD-P[ED]-SSLV-----T-FRN-----S-GYL--   |                                                            |
|                             | Other Bacteria               | Acidithiobacillus                                           | 218665927                                                   | ---N--R-Q-V--LI-SE-WVHDVAEP[ER]-VSLV---M-KT--RN----S--YL-- |
|                             |                              | Alkalilimnicola ehrlichii                                   | 114321000                                                   | -----LAA-V---V--EIRVED-EAE[RD]HSAL-----LD--AA-----SLSYQQ-  |
| Allochromatium vinosum      |                              | 288940218                                                   | R-----V-A-V-----LWVRNPEDA[NH]-H-LV--AQ-EP--RN-T--IS-GFV--   |                                                            |
| Arsenophonus nasoniae       |                              | 284008505                                                   | ---G--HAE-----I---FYLES-LLG[DE]VAHL-I-A--NK--HN-TL-ISA-YQK- |                                                            |
| Azotobacter vinelandii      |                              | 226945926                                                   | -----MAG-V--C---IWL-SAEP-[AP]LS-L--AM-AK--RN-TE-VS-G-T--    |                                                            |
| Cellvibrio japonicus        |                              | 192360327                                                   | -----Q-T-----S-F-M-SHET-[GK]-TLL--AMNQ--KNIIE-IS--RS-       |                                                            |
| Chromohalobacter salexigens |                              | 92112711                                                    | -T---Q-A-L--VI--LWMENPHDE[EH]-Y-V--AM-ND--RH-TE-ISQG-S--    |                                                            |
| Congregibacter litoralis    |                              | 88706741                                                    | --H--VNA----F---WVT-SLK-[DE]AHPLC--VMNAT---N-T---S--YR--    |                                                            |
| Edwardsiella ictaluri       |                              | 238918790                                                   | ---GS-H-A---LV-----VRS-TMG[DE]LSAL--AC-NQ--QN-TQ-ISH-YQR-   |                                                            |
| Edwardsiella tarda          |                              | 269138108                                                   | ---GS-H-A---LV-----VRS-TMG[DE]LSAL-I-AC-N--QN-TQ-ISH-YQR-   |                                                            |
| Halorhodospira halophila    |                              | 121998235                                                   | ---R--LAA-V---I-G--WL-DDTVE[FG]YA-L-----G--RA-----S--YR--   |                                                            |
| Marinobacter algicola       |                              | 149377463                                                   | R-----M-A-V---I---LWVENPDEP[DN]-F-I---A-NND---N-TEVSLGYT--  |                                                            |
| Methylophaga thiooxidans    |                              | 254491862                                                   | -LFN--MQA-V--L---LRLKDP[KS]ST-FV---MNL--FHN-----S--Y---     |                                                            |
| Nitrococcus mobilis         |                              | 88812392                                                    | ---R--VNA-V---I--EIRV-DADAS[ER]-A-LV--A-TQ--RT-T----GYL--   |                                                            |
| Proteus mirabilis           |                              | 227357235                                                   | ---G--H-A-----V---YLET-LLG[DE]YAHL-I-A--NV--QN-TL-ISE-YKH-  |                                                            |
| Providencia rettgeri        |                              | 291326493                                                   | R--G--H-A-----I---FYVES-LLG[DE]ISHL-V-A-NN---QN-TL-ISE-YQK- |                                                            |
| Pseudomonas mendocina       |                              | 146308059                                                   | ---T-M-A-V--C---IWM-SAEE-[GP]LT-L--AMNPK--RN-TE-IS-G-A--    |                                                            |
| Saccharophagus degradans    | 90020753                     | -----Q-A-V--C-C-FRMEPLDEE[SN]-AIF--AMNP--RNITE-ISLSYQK-     |                                                             |                                                            |
| Yersinia pestis             | 167470458                    | ---GS-H-A-----I---FYVQS-ILG[DE]LAHL-V-A-NN---QN-TL-ISE-YQR- |                                                             |                                                            |

Figure S32

Partial sequence alignment of a conserved region DNA polymerase III subunit alpha showing a 2 aa deletion that is commonly shared by all Xanthomonadales except *Pseudoxanthomonas suwonensis* and *Rhodanobacter* sp. 2APBS1. These two have only 1 aa deletion at the same position.
