# Supplementary material for: Phylogenomics and Molecular Signatures for Species from the Plant Pathogen-Containing Order Xanthomonadales
Source: PubMed Central journal article supplement (PMC3568101; doi:10.1371/journal.pone.0055216), 2013-02-08
Supplement: pone.0055216.s033.pdf [file pone.0055216.s033.pdf]

|                  |                              |           |                                     |    |                           |
|------------------|------------------------------|-----------|-------------------------------------|----|---------------------------|
|                  | Stenotrophomonas maltophilia | 194364933 | GELGAAVIIDAVARLQDQALNDAESAAQDSFEG   | DL | GLLDCPHYSQPAQHPLGDVPEVLR  |
|                  | Stenotrophomonas sp. SKA14   | 254523049 | -----VV-V-T-----V-----              | PQ | -----H-T-AW---D---        |
|                  | Xanthomonas campestris       | 289662769 | -----VV-V-T---E-V-----              | PQ | -----H-SS-AW---           |
|                  | Xanthomonas oryzae           | 166713046 | -----VV-V-----V-----                | PQ | -----H-T-AW---D---        |
|                  | Xanthomonas axonopodis       | 21242047  | ---A---LV---LT---E-----             | PD | -----TH-RM-A--E-A---      |
| Xanthomonadales  | Xanthomonas albilineans      | 285017748 | -----VV-V-T-----V-----              | PQ | -----H-ST-AW---D---       |
|                  | Xanthomonas vesicatoria      | 325914812 | -----LV-V-T---E-V-----              | PQ | -----H-ST-DW---D---       |
|                  | Xanthomonas gardneri         | 325919893 | ---A---L---T---E-V-----             | EG | -----FTH--S-AW-E-----     |
|                  | Pseudoxanthomonas spadix     | 357416994 | -----VV---T---E-V-----K---A         | AD | S---Y---TH-SN-AF-N-----   |
|                  | Xylella fastidiosa           | 71275920  | ---A---IVV-T-----G---E---D          |    | -----H-VE-AY-V--A---      |
|                  | Pseudoxanthomonas suwonensis | 319786605 | ---A---V---G---E---H---Q---E---AD   |    | -----AR-VHDA--S--D--L-    |
|                  | Rhodanobacter sp. 2APBS1     | 352081083 | ---P-M-LM---V---V-GHKA--VE---TD     |    | -----TR-EILDGQK-----L-    |
|                  | Alteromonas macleodii        | 196156516 | ---P-M-M---SIS-FIP-V-GHHA--EE---MT  |    | -----TR-EVLEGME--R--L-    |
|                  | Arsenophonus nasoniae        | 284007746 | ---P-M-L---T---LP---GH-D---EE---TD  |    | -----TR-EVYEGKR-----L-    |
|                  | Azotobacter vinelandii       | 226945995 | ---P-M-L---IT---VP---GH-Q---E---TD  |    | -----TR-EEFGLR--D--V-     |
|                  | Cellvibrio japonicus         | 192359118 | ---P-M-L--S-S-FIP-V-GHEA--TE---AD   |    | -----TR-EVLEEME--A--L-    |
|                  | Citrobacter rodentium        | 283786227 | ---P-MTL--S--FIP-V-GHEA--QE---AD    |    | -----TR-EVLEGM--A--L-     |
|                  | Dickeya zeae                 | 251788624 | ---P-MTL--SIS-FVP-V-G-QA--EE---VD   |    | -----TR-EVLQDME--P--L-    |
|                  | Edwardsiella ictaluri        | 238921086 | ---P-MTL--S--FIP-V-GHEA--TE---AD    |    | -----TR-EVLEGM--A--L-     |
|                  | Enterobacter cancerogenus    | 261342038 | ---P-MTL--S--FIP-V-GKQA--DE---SN    |    | -----TR-EVLEGME--P--L-    |
|                  | Erwinia billingiae           | 300718045 | ---P-MTLV----FVP-V-G-LA--EE---AN    |    | -----TR-EVLGLE--S--K-     |
|                  | Grimontia hollisae           | 262273652 | --IA-MA--S-S-AP-V-GHN--E---N        | S  | -----TR-EIYRDKR-----L-    |
| Other            | Hahella chejuensis           | 83644608  | ---P-M-L---MVP-V-GHQD--E---AN       |    | -----TR-ETVNGQR--T--L-    |
| γ-Proteobacteria | Idiomarina baltica           | 85712462  | ---A-T-F---II--IP-S-GHLC--E---MN    |    | -----TR--EVDGLG--P--LG    |
|                  | Legionella longbeachae       | 270158992 | ---A-M-M--G---LP-V-G-EN--E---MT     | -F | -----TR-EKLFQDS-----LG    |
|                  | Methylophaga thiooxidans     | 254492628 | ---A-M---GL---LP-V-GA---Q---VN      |    | -----TR-EVIEGYR--P--L-    |
|                  | Nitrosococcus oceani         | 77165721  | ---P-MTM--S-S-V---V-GHQD--TE---HD   |    | -----TR-E-FEDMQ-----L-    |
|                  | Oceanospirillum sp. MED92    | 89091993  | ---P-M-L--S-S-FIP-V-GHQD--QE---AD   |    | -----TR-EVLDGMQ---I-L-    |
|                  | Providencia rustigianii      | 261346216 | ---P-M-LV---T---LP---GH-D---EE---TD |    | -----TR-EVYADKR-----L-    |
|                  | Pseudomonas aeruginosa       | 116051741 | ---A-M---GL---LP-V-GA---Q---VN      | A  | ---Y---TR--SLEEKN--A--LQ  |
|                  | Rickettsiella grylli         | 160871788 | ---P-MTL--S-S--VP-V-GKQA--E---SD    |    | -----TR-ESLDGV--A--L-     |
|                  | Shewanella baltica           | 126173450 | ---P-M-LL--LI-KLP---G-EL--Q---T     |    | -----TR-EKVGEDE--A--M-    |
|                  | Teredinibacter turnerae      | 254785311 | ---P-MTLV---S--VP-V-G-MA--E---TD    |    | -----TR-ESLDGVV--D--L-    |
|                  | Tolumonas auensis            | 237809702 | ---P-MTL--S-S-FVP-V-G-FA--EE---AD   |    | -----TR-EVLDGMR--S--K-    |
|                  | Vibrio fischeri              | 59711158  | ---P-MTL--S-S-FVP-V-G-FA--EE---AN   |    | -----TR-EVLDDK--S--K-     |
|                  | Vibrio splendidus            | 84394292  | ---A-L-L---CV--LP-VMGK-A-GTEE----   |    | ---EY---TR-RAWEGRTI---TG  |
| α-Proteobacteria | Methylobacterium sp. 4-46    | 170742648 | --PA-L-LL--V--LP-VMGN-M-GEEE--N     |    | ---EH---TR-QEFEGR-I---I-  |
|                  | Mesorhizobium ciceri         | 319780738 | --TA-L-LL--CV--LP-VMGSD--GVEE--SD   |    | ---EY---TR--SWDGR-----L-  |
|                  | Acetobacter tropicalis       | 339018068 | --IA-Q-V---TV--RE-V-GN---TEE-HSN    |    | ---EH-Q-TR--EWHGRAI---M-  |
|                  | Rhodobacter capsulatus       | 294675921 | --TA-I-LL--V--LP-VMGNR--GETE---T    |    | ---EH---TR-QEWEGRAI-DI-T- |
|                  | Brucella suis                | 23502764  | ---P-M-LM--V--LP-V---Q---YE---VD    |    | -----TR-EEYQGM--DI-M-     |
|                  | Lutiella nitroferrum         | 224824768 | ---P-M-LA--V--LP-----Q---YE---VD    |    | -----TR-EEYRGM--D--L-     |
|                  | Chromobacterium violaceum    | 34499128  | ---P-MAMM--V--LP-V---Q---V---V-     |    | -----TR-EEYEGVR--D--LG    |
| β-Proteobacteria | Burkholderia ubonensis       | 167586559 | ---P-MMLM--L--VP-V-G-MQ--E---SS     | -I | -----TK-LEFQMA-----L-     |
|                  | Neisseria meningitidis       | 325207635 | ---P-MALM--V--LP-V---Q---V---AD     |    | -----TR-EEYEGAR--D--LG    |
|                  | Burkholderia thailandensis   | 167837423 | --IA-MA----V-QLP-V-G--Q--V---VN     |    | -----TR-EEYESVR--D--LG    |
|                  | Ralstonia pickettii          | 187927901 | ---P-M-LL--IV-QLP---T-G--QE---AD    |    | -----TR-ERYEDER-----L-    |
|                  | Thauera sp. MZ1T             | 237653446 |                                     |    |                           |

Figure S33

Partial sequence alignment tRNA (guanine-N(1)-)-methyltransferase showing a 2 aa insert that is commonly present in all members of Xanthomonadales except *Pseudoxanthomonas suwonensis* and *Rhodanobacter* sp. 2APBS1.
