# Supplementary material for: Phylogenomics and Molecular Signatures for Species from the Plant Pathogen-Containing Order Xanthomonadales
Source: PubMed Central journal article supplement (PMC3568101; doi:10.1371/journal.pone.0055216), 2013-02-08
Supplement: pone.0055216.s034.pdf [file pone.0055216.s034.pdf]

|                                       |                                         | 290                                   |                            | 334                       |                          |
|---------------------------------------|-----------------------------------------|---------------------------------------|----------------------------|---------------------------|--------------------------|
| Xanthomonadales                       | <i>Stenotrophomonas maltophilia</i>     | 190573773                             | RGRTYTAGTINGQPAQAYQPPEGSVD | ETFAGVTAHIDNWRWVSGVPF     |                          |
|                                       | <i>Stenotrophomonas</i> sp. SKA14       | 254521422                             | -----                      | -----                     |                          |
|                                       | <i>Xanthomonas campestris</i>           | 78047793                              | -----S-----H-----          | ---VA-----A---            |                          |
|                                       | <i>Xanthomonas oryzae</i>               | 166712292                             | -----S-----H-----          | ---VA-----A---            |                          |
|                                       | <i>Xanthomonas axonopodis</i>           | 21242810                              | -----S-----H-----          | ---VA-----A---            |                          |
|                                       | <i>Xanthomonas fuscans</i>              | 294624878                             | -----S-----H-----          | ---VA-----A---            |                          |
|                                       | <i>Xanthomonas albilineans</i>          | 285018600                             | -----V-----                | ---VA---Y---A---          |                          |
|                                       | <i>Xanthomonas perforans</i>            | 325928380                             | -----S-----H-----          | ---VA-----A---            |                          |
|                                       | <i>Xanthomonas gardneri</i>             | 325920391                             | -----S-----H-----          | ---VA-----A---            |                          |
|                                       | <i>Xanthomonas vesicatoria</i>          | 325917568                             | -----S-----H-----          | ---VA-----A---            |                          |
|                                       | <i>Xylella fastidiosa</i>               | 28198263                              | ----S-----S--VP-----N-     | ---V---Y---A---           |                          |
|                                       | <i>Pseudoxanthomonas suwonensis</i>     | 319786896                             | -----E-V--S--DD--          | ---V-----A---             |                          |
|                                       | <i>Rhodanobacter</i> sp. 2APBS1         | 352080567                             | --Q-R--VAE-AGVPG-PEEL-NSK  | SNT ---VALK-E-A---A---    |                          |
|                                       | <i>Pseudoxanthomonas spadix</i> BD-a59  | 357417100                             | --Q-A--V--AVP--RDEDTVSP    | TSDT ---YVAIKLA--S---A--- |                          |
|                                       | <i>Alteromonas macleodii</i>            | 239993587                             | --Q--S-FVK-EEVPG-LEE--ANT  | QSKT ---VAIK-E-----A---   |                          |
|                                       | <i>Azotobacter vinelandii</i>           | 226942365                             | --Q-A--K-G--EVP--YFEKNV-S  | DSDT ---VA-H-E-----A---   |                          |
|                                       | <i>Candidatus Blochmannia</i>           | 33519903                              | --Q---F----VPG-LEEI--NK    | DSKT ---VSIKVN-----F---   |                          |
|                                       | <i>Citrobacter koseri</i>               | 157145373                             | --Q--T-FAQ-KKVP-LEE--ANK   | SSNT ---VAIRVD-----A---   |                          |
|                                       | <i>Colwellia psychrerythraea</i>        | 71278552                              | --Q-SD-FL--VSVPG-LNE--ANA  | NSNT ---VAIK-E-----K---   |                          |
| <i>Cronobacter sakazakii</i>          | 156933569                               | --Q--S-FAQ-KKVP-LEE--ANK              | TSHT ---VAIRVD-----A---    |                           |                          |
| <i>Dickeya dadantii</i>               | 307130899                               | --Q--S-FVQ-KKVP-LEE--ANK              | TSNT ---VAIRVD--D-----     |                           |                          |
| <i>Edwardsiella tarda</i>             | 294635846                               | --Q---FVQ-KKVP-LEE--ANK               | SSNT ---TAIR-D-----A---    |                           |                          |
| <i>Enterobacter cancerogenus</i>      | 261340238                               | --Q---FAQ-KKVP-LEE--ANK               | ASNT ---VAIRVD--D---A---   |                           |                          |
| <i>Erwinia amylovora</i>              | 292488528                               | --Q--S-FVQ-KKVP-LEE--ANK              | SSNT ---VIRVD--D---A---    |                           |                          |
| <i>Escherichia coli</i>               | 600735                                  | --Q---FAQ-KKVP-LEE--ANK               | SSNT ---VAIRVD-----A---    |                           |                          |
| <i>Haehella chejuensis</i>            | 83643249                                | --Q---N-D-K-VPG-LDE--ANE              | GSST -S-VAIK-E-C---A---    |                           |                          |
| <i>Idiomarina baltica</i>             | 85711651                                | --Q-QG-F-GE-KVPG-LQE--ARE             | NSDT ---VALKVN-----        |                           |                          |
| <i>Legionella drancourtii</i>         | 254495818                               | -AQ-VGNV----KIPG-LDE--AYK             | ESTT ---VAIK-F-----A---    |                           |                          |
| <i>Legionella longbeachae</i>         | 270159029                               | -AQ-VENV----NVLG-LDE--AHR             | SSTT ---VAIK-Y-----        |                           |                          |
| Other<br>γ-Proteobacteria             | <i>Marinobacter algicola</i>            | 149378411                             | --Q---SG-K-VPG-LEE--AAR    | GSKT ---VALK-E-----       |                          |
|                                       | <i>Pantoea ananatis</i>                 | 291617744                             | --Q--S-FVQ-KKVP-LEE--ANK   | TSAT ---VAIRVD-----A---   |                          |
|                                       | <i>Pectobacterium carotovorum</i>       | 227111595                             | --Q--S-FVQ-HKVP-LEE--ANK   | SSST ---VIRVD--D-----     |                          |
|                                       | <i>Photobacterium asymbiotica</i>       | 253989923                             | --Q---FVQ-SKVP-LEE--ANQ    | SSRT ---VIRVD--D---A---   |                          |
|                                       | <i>Proteus mirabilis</i>                | 197285018                             | --Q---FVQ-KKVP-LEE--ANK    | ASNT ---VAIR-D-----A---   |                          |
|                                       | <i>Providencia stuartii</i>             | 183600611                             | --Q-C--QV--ET-TD-CNEP-IP-  | DTNT ---ALRIE-----K---    |                          |
|                                       | <i>Pseudomonas entomophila</i>          | 104784395                             | --Q-G--K-G--EVP--YFEKDV-N  | DSDT ---VA-Q-----AS---    |                          |
|                                       | <i>Salmonella enterica</i>              | 161502998                             | --Q---FAQ-KKVP-LEE--ANK    | SSNT ---VAIRVD-----A---   |                          |
|                                       | <i>Serratia proteamaculans</i>          | 157371008                             | --Q---FVQ-KKVP-LEE--ANK    | SSNT ---VAIRVD---Q-A---   |                          |
|                                       | <i>Shewanella amazonensis</i>           | 119774947                             | --Q-S--FLK-S-VPG-LEE--AN-  | NSNT ---VALRVD-----A---   |                          |
|                                       | <i>Shigella flexneri</i>                | 30063263                              | --Q---FAQ-KKVP-LEE--ANK    | SSNT ---VAIRVD-----A---   |                          |
|                                       | <i>Sodalis glossinidius</i>             | 85059248                              | --Q--G-FVQ-KKVP-LEE--ANK   | NSRT ---VIRVD-----A---    |                          |
|                                       | <i>Thiomicrospira crunogena</i>         | 78485558                              | -AQ---E-----VP--LDEP-MAP   | DSVT ---Y-ALKLYV-----A--- |                          |
|                                       | <i>Xenorhabdus nematophila</i>          | 300723115                             | --Q---FVH-KKVP-LEE--ANK    | ASKT -S-VIRVD--D-----     |                          |
|                                       | <i>Yersinia bercovieri</i>              | 238782520                             | --Q---FVQ-NKVP-LEE--ANK    | SSNT ---VIRVD--D---A---   |                          |
|                                       | <i>Magnetospirillum magnetotacticum</i> | 23006819                              | --Q-A--AV--R-VES--ADL--A   | ASRT ---VALKLEVRSG--A---  |                          |
|                                       | α-Proteobacteria                        | <i>Acidiphilium multivorum</i> AIU301 | 326403463                  | --Q-G--EVS--S-RG-REEP-VAA | DSNT ---YVALRLA-----A--- |
|                                       |                                         | <i>Rhodopseudomonas palustris</i> TIE | 192292523                  | --Q--S-K-GDTPDIPD-RSAKDVA | DSTT ---AL-LS-----A---   |
|                                       |                                         | <i>Bradyrhizobium japonicum</i> USDA  | 27381871                   | -AQ-L--R-GDEEITD-RKT-DVKP | GSTT ---VALKLM-----A---  |
| <i>Beijerinckia indica</i> subsp. ind |                                         | 182677454                             | --Q-GE-E-L--KIT--RAS-TV-P  | ASMT ---Y-ALKLW-----Q---  |                          |
| <i>Starkeya novella</i> DSM 506       |                                         | 298293806                             | --Q-R--FV--EAVKD-RAEKDV-P  | NSRT ---YVALKCFV-S--N---  |                          |
| <i>Bradyrhizobium</i> sp. BTAi1       |                                         | 148240947                             | -AQ--E--VR-RAVRN-REEPNIA   | ASRT ---YVALRLM-----A---  |                          |
| <i>Oligotropha carboxidovorans</i> OM |                                         | 209884211                             | --Q-L--R-GDROVGY-RQTKDVSP  | DSTI ---Y-ALKLT-----A---  |                          |
| <i>Nitrobacter hamburgensis</i> X14   |                                         | 92118736                              | --Q-H--K-GD-AVGD-RKTPDVKP  | DSTT ---Y-ALKLT-----A---  |                          |
| <i>Rhizobium etli</i> CNPAF512        |                                         | 327188643                             | --A---PL--VELP--RETQDVSP   | DSRT ---YVALKLYA-T---A--- |                          |
| <i>Burkholderia xenovorans</i> LB400  |                                         | 91778346                              | --Q---AVD-EAVKG-LEEDNVPA   | GSRA ---VALR---N---AH---  |                          |
| β-Proteobacteria                      | <i>Ralstonia solanacearum</i> CMR15     | 299069923                             | --Q-LE-A-A--V-G-LAEH-IPH   | DSRT ---VAIK-E-A---A---   |                          |
|                                       | <i>Baumannia cicadellinicola</i> str.   | 94676633                              | --Q---IVH-RKVP-LEER-ANK    | NSNT ---IS-RVD---Q-V---   |                          |
|                                       | <i>Delftia acidovorans</i> SPH-1        | 160901031                             | --Q-L--ASQ--VP--QEK-VAA    | GSQT ---VALRTE-C---A---   |                          |
|                                       | <i>Rhodiferax ferrireducens</i> T118    | 89899926                              | --Q-A--S-G-A-VA--REET-V-P  | HSHT ---VALRTE-S---A---   |                          |
|                                       | <i>Leptothrix cholodnii</i> SP-6        | 171060061                             | --Q-R--NVD-KKVP--LDEVKVP   | GSHC ---VAIRTEVQ---A---   |                          |
|                                       | <i>Burkholderia multivorans</i> CGD2M   | 221201170                             | --Q-H--V-K-VQVP--ATEP-VKP  | DSQT ---VALK-E-E---A---   |                          |

Figure S34

Partial sequence alignment of a conserved region in glucose-6-phosphate 1-dehydrogenase showing a 4 aa deletion that is uniquely present in all Xanthomonadales except *Pseudoxanthomonas spadix* BD-a59 and *Rhodanobacter* sp. 2APBS1 which has 3 aa insert.
