# Supplementary material for: Phylogenomics and Molecular Signatures for Species from the Plant Pathogen-Containing Order Xanthomonadales
Source: PubMed Central journal article supplement (PMC3568101; doi:10.1371/journal.pone.0055216), 2013-02-08
Supplement: pone.0055216.s035.pdf [file pone.0055216.s035.pdf]

|                                       |                                     | 461                           |                            | 583                                                              |                                 |
|---------------------------------------|-------------------------------------|-------------------------------|----------------------------|------------------------------------------------------------------|---------------------------------|
| Xanthomonadales                       | <i>Xylella fastidiosa</i> 9a5c      | 77747612                      | ELLVDAAVVHGVDLYHLSLDQLRL   | RLVTNAQPTMLREARDHVTGMRYQQLEEILRTVGVDSLSEGDVPKHWQIDVLRQAQWPDFDWNH |                                 |
|                                       | <i>Xylella fastidiosa</i> Ann-1     | 71899829                      | -----                      | -----E-----                                                      |                                 |
|                                       | <i>Xylella fastidiosa</i> Dixon     | 71275191                      | -----                      | -----E-----                                                      |                                 |
|                                       | <i>Xanthomonas gardneri</i>         | 325922521                     | -V--SG-Q-----L-TV---Q-     | --IST-ES-HAF-----E-LATGA-A---NTVSSI---A-RE-QT--A-L--GL-A---R     |                                 |
|                                       | <i>Xanthomonas oryzae</i>           | 188576356                     | -V--SG-Q-----L-TV---Q-     | -MIST-ES-HAF-----E-LASGA-A---AT-VGI---A-RE-QT--A-L--GL-T---R     |                                 |
|                                       | <i>Xanthomonas axonopodis</i>       | 346724509                     | -V--SGL-K-----L-V---Q-     | --IST-ES-HAF-----E-LASGA-A---TSVVGI---A-R--QT--A-L--GL-R---R     |                                 |
|                                       | <i>Xanthomonas campestris</i>       | 78047224                      | -V--SGL-K-----L-V---Q-     | --IST-ES-HAF-----E-LASGA-A---TSVVGI---A-R--QT--A-L--GL-R---R     |                                 |
|                                       | <i>Xanthomonas perforans</i>        | 325928155                     | -V--SGL-K-----L-V---Q-     | --IST-ES-HAF-----E-LASGA-A---TSVVGI---A-R--QT--A-L--GL-R---R     |                                 |
|                                       | <i>Xanthomonas fuscans</i>          | 294626370                     | -V--SGL-K-----L-V---Q-     | --IST-DS-HAF-----E-LASGA-A---ASVVGI---A-R--QT--A-L--GL-S---R     |                                 |
|                                       | <i>Xanthomonas vesicatoria</i>      | 325915467                     | -V--SGL-Q-----L-TV---Q-    | --IST-DS-HAF-----E-LATGA-A---ATMMRI---A-HEA-QT--A-L--GL-S---R    |                                 |
|                                       | <i>Pseudoxanthomonas spadix</i>     | 357417248                     | -V---G-Q-----R-D-L-Q-      | ---S---EGF--A--E-LASGA-ST--ATVARI                                |                                 |
|                                       | <i>Stenotrophomonas maltophilia</i> | 194366356                     | -T---GI-K-----R--R---H-    | K--LD-ED-SA-AAALKL-LPAEGSGAVLNAV                                 |                                 |
|                                       | <i>Stenotrophomonas</i> sp. SKA14   | 254523079                     | -T---GI-KS-----R-NR---H-   | K--LD-ED-SA-AAALKL-LPAEGSGAVLNAV                                 |                                 |
|                                       | <i>Xanthomonas albilineans</i>      | 285018504                     | --EFGF-QSL---A-RVED-V-M    | KAALD-ASSAD--QAVEESKGLVLDAAGYAA                                  |                                 |
|                                       | <i>Rhodanobacter</i> sp. 2APBS1     | 352085801                     | -A-ELDI--SP---G-GV-DFVEM   | KRRIDERDG-TP                                                     |                                 |
|                                       | <i>Pseudoxanthomonas suwonensis</i> | 319787332                     | -S-AEFGYLRD-S--R-T--D--EM  | KRRADEREG-TP                                                     |                                 |
|                                       | <i>Escherichia coli</i>             | 195938757                     | DQ--EKEY--TP---FK-TAGK-TG- | VAPAKSGVKS                                                       |                                 |
|                                       | Other Bacteria                      | <i>Citrobacter koseri</i>     | 157144662                  | DQ--EKEY--TP---FR-TAGK-TG-                                       | G-V--R--D--L---T--N--A---Y---I  |
|                                       |                                     | <i>Klebsiella pneumoniae</i>  | 364519394                  | DQ--EKEY--TP---FR-TAGK-TG-                                       | ERMGP-S--VVN-LEKAKE--FA---Y---I |
|                                       |                                     | <i>Enterobacter aerogenes</i> | 336246576                  | DQ--EKEY--TP---FR-AGK-TG-                                        | DRMGP-S--VVN-LEKAKE--FA---Y---I |
| <i>Cronobacter sakazakii</i>          |                                     | 156933031                     | DQ--EKEY--TP---FR-TAGK-TG- | DRMGP-S--VN-LEKAKE--FA---Y---I                                   |                                 |
| <i>Salmonella enterica</i>            |                                     | 213618983                     | DQ--EREY--TP---FR-TAGK-TG- | DRMGP-S--VVN-LEKAKA--FA---Y---I                                  |                                 |
| <i>Erwinia billingiae</i>             |                                     | 300717845                     | DQ--EKEY--TP---FR-TAGK-TG- | DRMGP-S--VVNSLEKAKT--A---YS--I                                   |                                 |
| <i>Photorhabdus luminescens</i>       |                                     | 37525354                      | DQ--KEY-KTP---FR-TAGK-TG-  | DRMGP-S--VVD-LEKAKK--FA---Y---I                                  |                                 |
| <i>Pantoea vagans</i>                 |                                     | 308187689                     | DQ--EKEY-DTP---FR-TAGK-TG- | DRMGP-S--IVD-LEKAKS--A---Y---I                                   |                                 |
| <i>Dickeya dadantii</i>               |                                     | 307132386                     | DQ--EKEY-KTP---FR-AGI-TG-  | DRMGP-S--VN-LNKAKS--FA---Y---I                                   |                                 |
| <i>Yersinia pseudotuberculosis</i>    |                                     | 153948204                     | -Q--EKQY-ENP---FQ-TAGK-TG- | DRMGP-S-----LEKAK--FA---Y---I                                    |                                 |
| <i>Aliivibrio salmonicida</i>         |                                     | 209695779                     | -Q--KEM-ETP---FK-AGV-TV-   | DRMGP-S--VVN-LNKAKE--S---YS--I                                   |                                 |
| <i>Providencia stuartii</i>           |                                     | 183599716                     | DQ--EKEY-KNP---Q--AGI-TG-  | DRMGP-S--VE-LNK-KS---A--IY---I                                   |                                 |
| <i>Vibrio cholerae</i>                |                                     | 153217073                     | -Q--REM-STP---FR-RAGE-TI-  | ERMGP-S--V-D-LNKAK---PK--Y---I                                   |                                 |
| <i>Proteus mirabilis</i>              |                                     | 197285679                     | DQ--EKEY-KTP---FR-DEKI-SG- | ERMGE-S-KK-LN-LEKAKS--FA--IY---I                                 |                                 |
| <i>Acidovorax delafieldii</i>         |                                     | 241764431                     | DQ---N-IRTLP---R-G-TS-IA-  | ERM-E-S--VL--LEK-K---P-----I                                     |                                 |
| Burkholderiales bacterium             |                                     | 303258051                     | -Q-IEHDL-TT---I-R-TV-K-VG- | DRMQ-S-EK-V-S-EA-KK-----Y-ISI                                    |                                 |
| <i>Nitrosomonas eutropha</i>          |                                     | 114330949                     | DQ-I-REL--TP---K-NI-T-AS-  | ERM-E-S-R-VT--EH-KK---P--IY---I                                  |                                 |
| <i>Thiocystis violascens</i>          |                                     | 350556847                     | -Q--LDW-REP---R-TPE-A--    | ERMGE-S-A-L-L--LE--KE-SFA-I---I                                  |                                 |
| <i>Desulfohalobaculum acetoxidans</i> |                                     | 328954073                     | -Q-I-QGL-QD---R-QASD--P-   | ERF-E-S--IVQ--AG-KKPS-G--IY---I                                  |                                 |
| <i>Methylovorus glucosetrophus</i>    |                                     | 253999028                     | DQ--G-HI-TL--I-R-D-AT-SS-  | DRM-E-S-K-I-K-L-A-KA---A--IY---I                                 |                                 |
| <i>Pseudomonas psychrotolerans</i>    |                                     | 359783270                     | -Q--R-L-KSP---T-TYE-VVE-   | EGF-EVSSR-L--EA--RPA-A-I---I                                     |                                 |
| <i>Oceanospirillum</i> sp. MED92      |                                     | 89094416                      | -M--LDM--NP---A-QQTE-A--   | ERMGP-S-E-VN--QA--N-E-P---Y---I                                  |                                 |
| <i>Haemophilus influenzae</i>         |                                     | 260581847                     | -Q--RELI-TP---FK-D-TT-T--  | ERMV-S-E-ALNSLEKAKS--A-I---I                                     |                                 |
| <i>Pseudomonas aeruginosa</i>         |                                     | 152984776                     | -Q--RGL-ASP---T-TY--VFE-   | EGF-ELSTN-L--AD--TPS-A-I---I                                     |                                 |
| <i>Aggregatibacter aphrophilus</i>    |                                     | 347813461                     | -Q--REL--TP---FK-D-AT-T--  | ERMGS-S-E-ALVLEKAKH---A-I---I                                    |                                 |
| <i>Salmonella enterica</i>            |                                     | 213865477                     | DQ--EREY--TP---FR-TAGK-TG- | DRMGP-S--VVN-LEKAKA--FA---Y---I                                  |                                 |
| <i>Francisella novicida</i>           |                                     | 208779663                     | -Q-A-NLIKYP--I-K-NF---TG-  | ERMGA-SS--VLDS-KK-KTPS-A-I--I-I                                  |                                 |
| <i>Shewanella baltica</i>             |                                     | 217972882                     | -Q-I-KEL-QSP---FK-TASMMTM- | DRMGM-S-T--A--EAAKT--A---Y---I                                   |                                 |
| <i>Enterobacter cloacae</i>           |                                     | 296104078                     | DQ--EKEY--TP---FK-TAGK-TG- | DRMGP-S--VVN-LEAAKE--FA---Y---I                                  |                                 |
| <i>Geobacter metallireducens</i>      |                                     | 78223924                      | -Q-LRLGL-GN----T-TR-DFMKF  | DRMGE-L-E-LN--EA-KKRE-S-I---I                                    |                                 |
| <i>Bdellovibrio bacteriovorus</i>     |                                     | 42521704                      | -T--NKLLTRFS-F-R-TKE-I-S-  | ERQGD-S-D-I-KS-EN-KNP--A-I---I                                   |                                 |
| <i>Gemmatimonas aurantiaca</i>        |                                     | 226226196                     | QQ-L--GL--D---FDITV--TS-   | ERF-K-S-E--V--AAAK-QP-S-LM-G--I                                  |                                 |
| <i>Capnocytophaga sputigena</i>       |                                     | 213962174                     | -Q-FR-GII-TY---EVTVEK--P-  | ERM-Q-S-E-IVKG-QK-KEIPF--V---I                                   |                                 |
| <i>Enterococcus italicus</i>          |                                     | 315641089                     | -QFFNHGF-ED----R-T-----TI  | D-VKE-S-T-MLQ--EA-K-NS--KL-G-I                                   |                                 |
| <i>Bacillus</i> sp. B14905            |                                     | 126649600                     | -Q-LR-DLI-D-S-----TIE--VE- | ERMGE-S-T--VN--QA-KENSM--L-IG--I                                 |                                 |

Figure S35

Partial sequence alignment of a conserved region of DNA ligase NAD dependent, showing a 57-65 aa insert that is commonly shared by all Xanthomonadales except *Pseudoxanthomonas suwonensis* and *Rhodanobacter* sp. 2APBS1. Both these species do not contain the insert of same length. This signature was previously identified by (Cutino-Jimenez et al., 2010) and was described as all Xanthomonadales specific Signature.
