# Supplementary material for: Phylogenomics and Molecular Signatures for Species from the Plant Pathogen-Containing Order Xanthomonadales
Source: PubMed Central journal article supplement (PMC3568101; doi:10.1371/journal.pone.0055216), 2013-02-08
Supplement: pone.0055216.s036.pdf [file pone.0055216.s036.pdf]

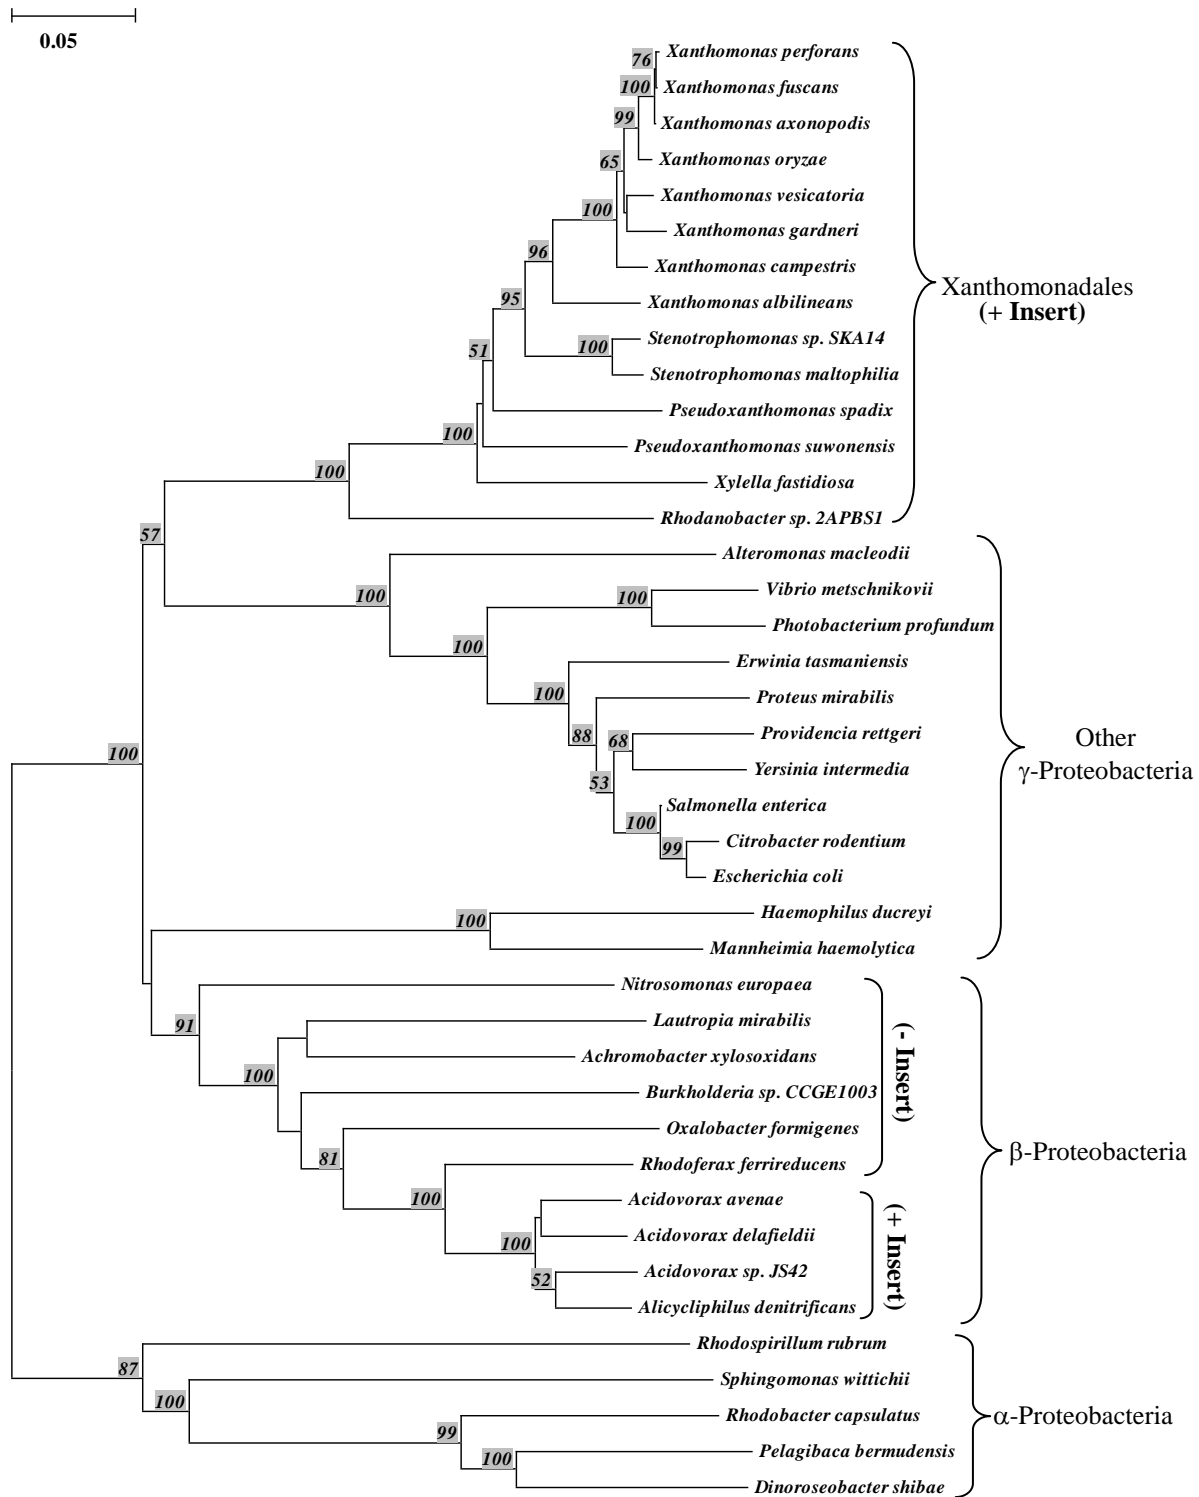

Figure S36

A Neighbor-joining (NJ) tree based upon carbamoyl phosphate synthase large subunit sequence. The numbers on the nodes indicate the bootstrap values. The Tree is showing the Xanthomonadales and various β-Proteobacteria with and without insert. Species representing α-Proteobacteria and some other Gammaproteobacteria are also shown in tree. The information for the respective CSI is shown in Fig. 8
