# Supplementary material for: Phylogenomics and Molecular Signatures for Species from the Plant Pathogen-Containing Order Xanthomonadales
Source: PubMed Central journal article supplement (PMC3568101; doi:10.1371/journal.pone.0055216), 2013-02-08
Supplement: pone.0055216.s037.pdf [file pone.0055216.s037.pdf]

|                                   |                                      | 58580688                           | 36                            | 77                            |               |
|-----------------------------------|--------------------------------------|------------------------------------|-------------------------------|-------------------------------|---------------|
| Xanthomonadales                   | <i>Xanthomonas oryzae</i>            | 58580688                           | GGGMVNVTLTGAKECRKVRIDPSILSDQ  | EMAEDLIAAAFNDA                |               |
|                                   | <i>Xanthomonas axonopodis</i>        | 21241865                           | -----S-----                   | -----                         |               |
|                                   | <i>Xanthomonas campestris</i>        | 78046684                           | -----S-----                   | -----                         |               |
|                                   | <i>Xanthomonas albilineans</i>       | 285017409                          | -----                         | -----                         |               |
|                                   | <i>Stenotrophomonas maltophilia</i>  | 190573046                          | -----S-----LT--P              | --L-----                      |               |
|                                   | <i>Xylella fastidiosa</i>            | 15838407                           | -----S-I-S-T-----N--          | --I-----                      |               |
|                                   | <i>Actinobacillus minor</i>          | 240948278                          | -A-L-K--IN--HN--RIE----LME-D  | K--V--V-----                  |               |
|                                   | <i>Aeromonas hydrophila</i>          | 117620231                          | -A---K--MA-SHSV-RIE----LME-D  | K--L--V--V---                 |               |
|                                   | <i>Aggregatibacter aphrophilus</i>   | 251793009                          | -A-L-KI-VN--HN--R-E----LME-D  | K--L-----Y---                 |               |
|                                   | <i>Alkalilimnicola ehrlichii</i>     | 114320665                          | ----A--IN-KH-A-R-S----LFE-D   | R--V--V-----                  |               |
|                                   | <i>Arsenophonus nasoniae</i>         | 284006439                          | -A-L-K--IN--HN--R-E----LMA-D  | K D-L-----                    |               |
|                                   | <i>Citrobacter koseri</i>            | 157146902                          | -A-L-K--IN--HN--R-E----L-E-D  | K--L--V-----                  |               |
|                                   | <i>Colwellia psychrerythraea</i>     | 71281215                           | -A---K--M--SHSV---EL-D-LME-D  | K D-I--L--V---                |               |
|                                   | <i>Cronobacter sakazakii</i>         | 156934950                          | -A-L-K--IN--HN--R-E----L-E-D  | K--L--V-----                  |               |
|                                   | Other<br>γ-Proteobacteria            | <i>Dickeya dadantii</i>            | 307129959                     | -A-L-K--IN--HN--R-E----LME-D  | K--L-----     |
| <i>Edwardsiella ictaluri</i>      |                                      | 238919041                          | -A-L-K--IN--HN--R-E----LME-D  | K--L--V-----                  |               |
| <i>Enterobacter cancerogenus</i>  |                                      | 261341081                          | -A-L-K--IN--HN--R-E----L-E-D  | K--L--V-----                  |               |
| <i>Erwinia tasmaniensis</i>       |                                      | 188534598                          | -A-L-K--IN--HS--R-EV--L-E-D   | K D-L--V-----                 |               |
| <i>Escherichia coli</i>           |                                      | 26246486                           | -A-L-K--IN--HN--R-E----L-E-D  | K--L--V-----                  |               |
| <i>Haemophilus influenzae</i>     |                                      | 68249042                           | -A-L-KI-IN--HN--RID----LME-D  | K--L-----                     |               |
| <i>Klebsiella pneumoniae</i>      |                                      | 206578120                          | -A-L-K--IN--HN--R-E----L-E-D  | K--L--V-----                  |               |
| <i>Pantoea ananatis</i>           |                                      | 291616583                          | -A---K--IN--HN--R-EV--L-E-D   | K D-L-----                    |               |
| <i>Pasteurella dagmatis</i>       |                                      | 260914408                          | -A-L-KI-IN--HN--RIE----LME-D  | K--L-----                     |               |
| <i>Pectobacterium carotovorum</i> |                                      | 227328731                          | -A-L-KI-IN--HN--R-E----LME-D  | K--L-----                     |               |
| <i>Photobacterium luminescens</i> |                                      | 37527700                           | -A-L-K--IN--HN--R-E----LME-D  | K--L-----                     |               |
| <i>Proteus mirabilis</i>          |                                      | 197284052                          | -A-L-KI-IN--HN--R-E----L-E-D  | K--L-----                     |               |
| <i>Providencia stuartii</i>       |                                      | 183600058                          | -A-L-K--IN--SHN--R-E----L-E-D | K--L-----                     |               |
| <i>Salmonella enterica</i>        |                                      | 56414360                           | -A-L-K--IN--HN--R-E----L-E-D  | K--L--V-----                  |               |
| <i>Shewanella sediminis</i>       |                                      | 157375986                          | -A-L-K--M--SHSV---D----L-E-D  | K--L-----C---                 |               |
| <i>Sodalis glossinidius</i>       |                                      | 85058668                           | -A-L-K--IN--HN--R-EV--L-E-D   | K D-L-----                    |               |
| <i>Vibrio cholera</i>             |                                      | 255745472                          | -A-L-K--V--SHSV--R-N--E-LME-D | K--L-----                     |               |
| <i>Xenorhabdus nematophila</i>    |                                      | 300721961                          | -A-L-KI-IN--HN--R-E----LMD-D  | K D-L-----                    |               |
| β-Proteobacteria                  |                                      | <i>Achromobacter xylosoxidans</i>  | 317406001                     | ---L-K--M-CRHDVKR-E----L-A-D  | K D-L--V----- |
|                                   |                                      | <i>Bordetella parapertussis</i>    | 33595894                      | ---L-K--M-CRHDVKR-A----L-GED  | K D-L--V----- |
|                                   |                                      | <i>Thiomonas intermedia</i>        | 296136311                     | -A-L-K--M-CKYGVKR-N----LVAED  | R D-L--V----- |
|                                   |                                      | <i>Pusillimonas</i> sp. T7-7       | 332283344                     | ---L-K--SM-CRHDVKR-T----L-A-D | K D-L--V----- |
|                                   |                                      | <i>Burkholderia rhizoxinica</i>    | 312796076                     | -A-L-K--M-CKN-V-R-T----L-A-D  | K D-L--V----- |
|                                   |                                      | <i>Bordetella pertussis</i> Tohama | 33592642                      | ---L-K--M-CRHDVKR-A--A-L-GED  | K D-L--V----- |
|                                   |                                      | <i>Achromobacter piechaudii</i>    | 293607023                     | ---L-K--M-CRHDVKR-V----L-G-D  | K D-L--V----- |
|                                   | <i>Bordetella petrii</i>             | 163857865                          | ---L-K--SMSCRHDVKR-A----L-A-D | K D-L--V-----                 |               |
|                                   | <i>Dechloromonas aromatica</i>       | 71906446                           | -A---K-LM-C-H-V-R-N----VMD-R  | --L-----L---                  |               |
|                                   | <i>Thauera</i> sp. MZ1T              | 217969821                          | -A---K-QM-CKYDV-R-S--E-VMD-R  | --L--V--L---                  |               |
|                                   | <i>Sideroxydans lithotrophicus</i>   | 291613733                          | -S---K-IM-C-H-V-R-NL-Q-V-D-K  | --L--V--L---                  |               |
|                                   | <i>Methyloversatilis universalis</i> | 334130680                          | -A---K-VM-CKHDV-R-S----VMD-R  | --L--L--V---                  |               |
|                                   | <i>Laribacter hongkongensis</i>      | 226939892                          | -A---KI-MSCNHDVKR-T--DGVMD-K  | --L-----I---                  |               |
|                                   | <i>Candidatus Accumulibacter</i>     | 257091957                          | -A---K-LM-CGH-DV-R-A----VMD-R | --L--V--L---                  |               |
|                                   | <i>Aromatoleum aromaticum</i>        | 56476073                           | -A---K-LM-CKYDV-R-T--D-VMD-K  | --L--L--V---                  |               |

Figure S37

Partial sequence alignment of a conserved region of Hypothetical protein XOO1065 showing a 1 aa deletion that is present in all Xanthomonadales. The deletion has also been found to be shared by few species from β-Proteobacteria but not in all of them.
