# Supplementary material for: Phylogenomics and Molecular Signatures for Species from the Plant Pathogen-Containing Order Xanthomonadales
Source: PubMed Central journal article supplement (PMC3568101; doi:10.1371/journal.pone.0055216), 2013-02-08
Supplement: pone.0055216.s038.pdf [file pone.0055216.s038.pdf]

|                                      |                                     | 69                       | 107                         |               |
|--------------------------------------|-------------------------------------|--------------------------|-----------------------------|---------------|
| Xanthomonadales                      | <i>Stenotrophomonas maltophilia</i> | 194364072                | GPAYKGIPLATAMACELAQGRGRELPL | SFNRKEAKAHGEG |
|                                      | <i>Stenotrophomonas sp. SKA14</i>   | 254524635                | -----D----                  | -----D----    |
|                                      | <i>Xanthomonas albilineans</i>      | 285017194                | -----L--Y-R--D-A-           | A-----I----   |
|                                      | <i>Xanthomonas fuscans</i>          | 294666112                | -----L--TY-G--D---          | A-----D----   |
|                                      | <i>Xanthomonas oryzae</i>           | 166713818                | -----L--AY-G--D---          | A-----D----   |
|                                      | <i>Xanthomonas campestris</i>       | 289666317                | -----L--AY-G--D---          | A-----D----   |
|                                      | <i>Xanthomonas axonopodis</i>       | 21244622                 | -----L--AY-G--D---          | A-----D----   |
|                                      | <i>Xanthomonas oryzae</i>           | 188578885                | -----L--AY-G--D---          | A-----D----   |
|                                      | <i>Xylella fastidiosa</i>           | 28198058                 | -----L--Y--E-D-L-           | T-----V-N---- |
|                                      | <i>Acinetobacter calcoaceticus</i>  | 262280500                | -----FVA-T-VA-S-VHNKSVPL    | W G-----D---- |
| <i>Actinobacillus minor</i>          | 257465331                           | -----I--TV-VA--NQFNVDKPL | C C-----D----               |               |
| <i>Actinobacillus succinogenes</i>   | 152978105                           | -----IG-TVSVAFN-FGLDKPL  | V C-----D----               |               |
| <i>Aeromonas hydrophila</i>          | 117618078                           | -----I-S-T-VQ-VEQHDVDVPL | W C-----D----               |               |
| <i>Aggregatibacter aphrophilus</i>   | 251793340                           | -----I--VSVAFN-QFNVDKPL  | V C-----D----               |               |
| <i>Alcanivorax borkumensis</i>       | 110833068                           | -----VA-VSVA--EHHGRDYP   | W A-----D----               |               |
| <i>Alteromonas macleodii</i>         | 239994378                           | -----I--TT-VA--DSHDLDVPL | Y C-----T----               |               |
| <i>Cardiobacterium hominis</i>       | 258545111                           | -----VA-V-VI-HAEHGLSLPL  | W T-----D----               |               |
| <i>Chromohalobacter salexigens</i>   | 92115319                            | -----TT-VA--DHHDRDLP     | F A-----D----               |               |
| <i>Citrobacter koseri</i>            | 157149260                           | -----I--TT-VA--EHHDKDLP  | Y C-----D----               |               |
| <i>Congregibacter litoralis</i>      | 88705454                            | -----TT-VA--DHHGRDVP     | F AY-----S----              |               |
| <i>Dickeya zeae</i>                  | 251791522                           | -----I--TT-VA--EHHDRDVP  | Y C-----D----               |               |
| <i>Edwardsiella ictaluri</i>         | 238918031                           | -----I--TT-VA--EHHDRDMP  | Y C-----D----               |               |
| <i>Enterobacter cloacae</i>          | 295095227                           | -----I--TT-VA--EHHDRDVP  | Y C-----T----               |               |
| <i>Erwinia pyrifoliae</i>            | 259906755                           | -----I--TTVVA--DHHDRDVP  | Y C-----D----               |               |
| <i>Escherichia albertii</i>          | 170766648                           | -----I--TT-VA--EHHDRDLP  | Y C-----D----               |               |
| <i>Escherichia coli</i>              | 15804183                            | -----I--TT-VA--EHHDLDLPL | Y C-----D----               |               |
| <i>Grimontia hollisae</i>            | 262273501                           | -----I--TT-VA--EHHNVDTPL | Y C-----D----               |               |
| <i>Haemophilus ducreyi</i>           | 33152772                            | -----I--TV-VA--NQFAIDKPL | C C-----T----               |               |
| <i>Haemophilus influenzae</i>        | 301168925                           | -----IG-SVSVAFN-YGIDKPL  | V C-----V-D----             |               |
| <i>Klebsiella pneumoniae</i>         | 206579381                           | -----I--TT-VA--EHHDRDLP  | Y C-----T----               |               |
| <i>Methylococcus capsulatus</i>      | 53803127                            | -----VA-T-IA--RVSG-EIPL  | Y A-----D----               |               |
| <i>Nitrococcus mobilis</i>           | 88813080                            | -----C-T-IA--EHHGRDVP    | Y A-D---T-T----             |               |
| <i>Oceanobacter sp. RED65</i>        | 94502049                            | -----ATT-MA-S-EFNRDTP    | Y T-----K-Y----             |               |
| <i>Oceanospirillum</i>               | 89093848                            | -----ATT-VA--SDQHG-DVPL  | Y V-----D----               |               |
| <i>Pantoea ananatis</i>              | 291619461                           | -----I--TT-VA--DHHDRDVP  | Y C-----D----               |               |
| <i>Pectobacterium wasabiae</i>       | 261823587                           | -----I--TA-VA--EHHDRDLP  | Y C-----D----               |               |
| <i>Photobacterium damsela</i>        | 269103913                           | -----I--TT-VA--DQHDIDTPL | Y C-----D----               |               |
| <i>Proteus penneri</i>               | 226326903                           | -----I--TT-VA--VEHHDIDIP | Y C-----D----               |               |
| <i>Providencia stuartii</i>          | 183597212                           | -----I--TT-VA--EHHVDMP   | Y C-----D----               |               |
| <i>Pseudomonas stutzeri</i>          | 146280861                           | -----GA-T-IA--EQHQRDLP   | W C-----D----               |               |
| <i>Salmonella enterica</i>           | 161505732                           | -----I--TT-VA--EHHDKDLP  | Y C-----D----               |               |
| <i>Serratia odorifera</i>            | 270265233                           | -----I--TT-VA--EHHDRDVP  | Y C-----T----               |               |
| <i>Shigella dysenteriae</i>          | 82779133                            | -----I--TT-VA--EHHDLDLPL | Y C-----D----               |               |
| <i>Sodalis glossinidius</i>          | 85060190                            | -----I--TT-VA--EQHQRDVP  | Y C-----D----               |               |
| <i>Tolomonas auensis</i>             | 237806962                           | -----I-S-T-VQ--ELHQDQVPL | W C-----D----               |               |
| <i>Xenorhabdus bovienii</i>          | 290477305                           | -----I--TT-VA--E-HDIDMP  | Y C-----D----               |               |
| <i>Yersinia aldovae</i>              | 238760456                           | -----I--TT-VA--EHHDRDVP  | Y C-----D----               |               |
| <i>Ralstonia pickettii</i>           | 171363652                           | -----T--S-T-VA--GM--DVGF | AY-----D----                |               |
| <i>Cupriavidus taiwanensis</i>       | 188590963                           | -----T--S-T-VA--GM--DVGF | AY-----D----                |               |
| <i>Sutterella wadsworthensis</i>     | 319940716                           | -----ASV-MN-SRM-CDV-W    | A-----I-D----               |               |
| <i>Variovorax paradoxus</i>          | 319790981                           | -----GATV-A--R--NY-F     | AY-----D----                |               |
| <i>Polaromonas naphthalenivorans</i> | 121603085                           | -----A-V-I--RL--N--F     | AY-----D----                |               |
| <i>Candidatus Accumulibacter</i>     | 257092321                           | -----VA-I-VA--RA--NF-F   | -----D----                  |               |
| <i>Methylibium petroleiphilum</i>    | 124265281                           | -----T--A-V-I--RL--N--Y  | AY-----T-D----              |               |

Figure S38

Partial sequence alignment of a conserved region of Orotate phosphoribosyltransferase showing a 1 aa deletion that is present in all Xanthomonadales. The deletion has also been found to be shared by species from  $\beta$ -Proteobacteria.
