# Supplementary material for: Phylogenomics and Molecular Signatures for Species from the Plant Pathogen-Containing Order Xanthomonadales
Source: PubMed Central journal article supplement (PMC3568101; doi:10.1371/journal.pone.0055216), 2013-02-08
Supplement: pone.0055216.s039.pdf [file pone.0055216.s039.pdf]

|                                       |                                         | 27                        |                              | 80                           |
|---------------------------------------|-----------------------------------------|---------------------------|------------------------------|------------------------------|
| Xanthomonadales                       | <i>Stenotrophomonas maltophilia</i>     | 190573489                 | AGVDEAGRGLAGPVAVAAVDFDARP    | R INGLDDSKQLTAARREQLHDRIIERA |
|                                       | <i>Stenotrophomonas sp. SKA14</i>       | 254523247                 | -----S-                      | -----E---YA--VD--            |
|                                       | <i>Xanthomonas campestris</i>           | 289670236                 | -----SK-                     | -----E---YA--VD--            |
|                                       | <i>Xanthomonas oryzae</i>               | 58581586                  | -----NK-                     | -----E---YA--VD--            |
|                                       | <i>Xanthomonas albilineans</i>          | 285018804                 | -----NQ-                     | -----T-YP----                |
|                                       | <i>Xanthomonas fuscans</i>              | 294625960                 | -----GK-                     | -----E---YA--VD--            |
|                                       | <i>Xanthomonas axonopodis</i>           | 21242160                  | -----GK-                     | -----E---YA--VD--            |
|                                       | <i>Xylella fastidiosa</i>               | 15837643                  | -----V-----SQ-               | -----N----SP-C--R-YAH-V--    |
|                                       | <i>Acinetobacter baumannii</i>          | 184157471                 | -----V-S-VA---IL--NN-        | -L--N---K--EKK--K-FIE-Q-K-   |
|                                       | <i>Allochromatium vinosum</i>           | 288941772                 | -----CA---IL----             | -A-IG---K-SP---R-EPL-RDQ-    |
|                                       | <i>Azotobacter vinelandii</i>           | 226945927                 | ----V----C-A-VT---IL--E-     | -L--N---K-SE---A-SEE-R-K-    |
|                                       | <i>Cellvibrio japonicus</i>             | 192358895                 | --C--V-----D-VA---IL--GQS    | -I-----K--EKK---F-E-RAK-     |
|                                       | <i>Citrobacter koseri</i>               | 157147385                 | ----V----V-A-VT---IL----     | -V--N---K-SEK--LA-Y-E-K-K-   |
|                                       | <i>Coxiella burnetii</i>                | 212212281                 | -----IT---ILN-EII            | -E--A---K-SLKK--E-YEK--TNC   |
|                                       | <i>Dickeya dadantii</i>                 | 242240382                 | ----V----V-A-VT---IL--K-     | -A--A---SEK--RV-Y-E-R-K-     |
| <i>Edwardsiella tarda</i>             | 294635136                               | ----V----V-A-VT---IL----  | -R--A---K-SEK--NA-Y-E-V-K-   |                              |
| <i>Enterobacter cancerogenus</i>      | 261338819                               | ----V----V-A-VT---IL----  | -V--N---K-SEK--LA-F-E-Q-K-   |                              |
| <i>Erwinia billingiae</i>             | 300715410                               | ----V----V-A-VT---IL----  | -V--A---K-SEK--LA-Y-E-V-K-   |                              |
| <i>Escherichia coli</i>               | 297517117                               | ----V----V-A-VT---IL----  | -A--N---K-SEK--LA-CEE-K-K-   |                              |
| <i>Idiomarina baltica</i>             | 85711419                                | C-----I---VA---IL--EQ-    | -E--N---K-S-KK--R-SEE-KAK-   |                              |
| <i>Kangiella koreensis</i>            | 256823113                               | ----V-----VA---IL--N-     | -V--A---K--EK---A-SIE-K-K-   |                              |
| <i>Klebsiella pneumoniae</i>          | 206579509                               | ----V----V-A-VT---IL--K-  | -V--N---K-SEK--LA-C-E-K-K-   |                              |
| <i>Marinobacter algicola</i>          | 149374423                               | ----V----V-A-VT---ILN-E-  | -P--A---K--DK---A-YEQ----    |                              |
| <i>Oceanospirillum sp. MED92</i>      | 89092102                                | ----V----V-N-VA---IL--NK- | -E--A---K---K--A-YHE-KDK-    |                              |
| <i>Pantoea sp. aB</i>                 | 304396658                               | ----V----V-A-VT---IL--N-  | -T--A---K-SEK--LA-Y-E-K-K-   |                              |
| <i>Pectobacterium atrosepticum</i>    | 50119985                                | ----V----V-A-VT---IL--T-  | -V--A---SEK--LS-Y-E-K-K-     |                              |
| <i>Photorhabdus asymbiotica</i>       | 253988139                               | ----V----V-A-VT---IL--S-  | -A--A---K-SEK---E-YLE-T-K-   |                              |
| <i>Proteus mirabilis</i>              | 197286117                               | ----V----V-A-VT---IL--N-  | -Q--M---K--EKK-NA-Y-E-K-K-   |                              |
| <i>Providencia alcalifaciens</i>      | 212710383                               | ----V----V-A-VT---IL--NN- | -E--A---K-SEKK--K-F-E-K-K-   |                              |
| <i>Pseudomonas aeruginosa</i>         | 107103156                               | ----V----C--VT---IL--S-   | -L--N---K-SE---A-FEE-R-K-    |                              |
| <i>Reinekea sp. MED297</i>            | 88798271                                | ----V-----K-VT---IL----   | -D--N---K-SP---LA-SQH-R-N-   |                              |
| <i>Rickettsiella grylli</i>           | 160872277                               | ----V-----FA---IL--NKKK   | MT--K-----KS--YFAKK-Q-K-     |                              |
| <i>Salmonella enterica</i>            | 161504651                               | ----V----V-A-VT---IL----  | -V--N---K-SEK--LA-Y-E-K-K-   |                              |
| <i>Serratia odorifera</i>             | 270264806                               | ----V----V-A-VT---IL----  | -I--A---K-SEK--LA-Y-E-V-K-   |                              |
| <i>Shewanella sediminis</i>           | 157376279                               | ----V----V-N-VT---IL--TK- | -T--N---K-SEKK--A-FTE-H-K-   |                              |
| <i>Shigella flexneri</i>              | 24111618                                | ----V----V-A-VT---IL----  | -A--N---K-SEK--LA-YEE-K-K-   |                              |
| <i>Sodalis glossinidius</i>           | 85059907                                | ----V----V-A-VT---IL----  | VL--A---K-SEK---A-YEE-TRY-   |                              |
| <i>Xenorhabdus bovienii</i>           | 290473671                               | ----V----V-A-VT---IL--K-  | -T--M---K--EK---A-YLE-K-K-   |                              |
| <i>Yersinia pestis</i>                | 22126997                                | ----V----V-A-VT---IL--N-  | -V--A---K-SEK--LS-Y-E-T-K-   |                              |
| $\beta$ -Proteobacteria               | <i>Burkholderia xenovorans LB400</i>    | 91784105                  | C-----VA---I---K-            | M -R--N---V---KK-DE-Y-K-VD-- |
|                                       | <i>Burkholderia phytofirmans PsJN</i>   | 187924419                 | C-----VA---I---SK-           | M -R--N---V---KK-DE-Y-K-VD-- |
|                                       | <i>Burkholderia phymatum STM815</i>     | 186476082                 | C-----VA---IL--K-            | M -R--T---V---KK-DE-YEK----  |
|                                       | <i>Ralstonia eutropha JMP134</i>        | 73541556                  | C-----YA---I---K-            | M LR--A---V---SK--A-Y-K-C--- |
|                                       | <i>Burkholderia graminis C4D1M</i>      | 170692156                 | C-----VA---I---SK-           | M -R--N---V---KK-DE-YEK-VD-- |
|                                       | <i>Burkholderia rhizoxinica HKI 4</i>   | 312796258                 | C-----VA---IL--K-            | M -R--N---A-SP-T--K-F---V--S |
|                                       | <i>Methylibium petroleiphilum PM1</i>   | 124262697                 | C-----VA---IL--S-            | M -D--N---S-K--DR-F-L-----   |
|                                       | <i>Cupriavidus necator N-1</i>          | 338166264                 | C-----YA---L--K-             | M -R--A---I---K---Y-K-C---   |
|                                       | <i>Ralstonia eutropha H16</i>           | 113868020                 | C-----YA---IL--K-            | M -R--A---I---K---YEK-C---   |
|                                       | <i>Burkholderia cenocepacia J2315</i>   | 206560439                 | C-----VA---IL----            | M -D-----V-S-KK-DL-Y-L-VA-S  |
|                                       | <i>Variovorax paradoxus EPS</i>         | 319793969                 | C-----VA---IL--DT-           | M -R--A---T---LQ--R---Q-LAK- |
|                                       | <i>Ralstonia solanacearum CMR15</i>     | 299067473                 | C-----TAG--LN-RK-            | M -Q--A---V---KK--A-Y-E-V-K- |
|                                       | <i>Variovorax paradoxus S110</i>        | 239815594                 | C-----VA---IL--DQ-           | M -R--A---T---LQ--R-N-Q-LAK- |
|                                       | <i>Comamonas testosteroni KF-1</i>      | 221066099                 | C-----VA---IL--DMK-          | M -A--N---K---N--V-Y-E-RAK-  |
|                                       | <i>Acidovorax avenae subsp. avena</i>   | 326316587                 | C-----VA---IL--ELQ-          | M -D--A---T-----A-F-E-RAK-   |
|                                       | <i>Acidovorax citrulli AAC00-1</i>      | 120610517                 | C-----VA---IL--ELQ-          | M -E--A---T-----A-F-E-RAK-   |
|                                       | <i>Aromatoleum aromaticum EbN1</i>      | 56478865                  | C-----S-VA---IL----          | M -D--N---K--ERA--R-APL-R--- |
|                                       | <i>Sideroxydans lithotrophicus ES</i>   | 291614100                 | C-----SA---IL--KS-           | M -E--A---K-SERQ-D--APL-R--- |
|                                       | <i>Methylocella silvestris BL2</i>      | 217977760                 | C-----A---IL--DNL            | M PR--N---REE--K-YES-MK---   |
|                                       | <i>Bradyrhizobium japonicum USDA</i>    | 27377632                  | --C-----VA---IL--D-I         | M PR--I---R---EQ--K-F-K-CAT- |
|                                       | <i>Agrobacterium radiobacter K84</i>    | 222085047                 | --A-----VA---IL--E-I         | M PQ--N---S---A-FAE-LAT-     |
|                                       | <i>Hoeflea phototrophica DFL-43</i>     | 163761011                 | --L-----VA---IL----I         | M PE--N---A-SRKK--T-F-Q--AT- |
|                                       | <i>Candidatus Hamiltonella defensus</i> | 238897797                 | ----V----V-T---IL--KN-       | M -I--A---T-SKKK-MA-YEE-THK- |
|                                       | <i>Bradyrhizobiaceae bacterium SG</i>   | 338973306                 | --C-----VA---IL--K-I         | M PK--I---R-SKE---FED-CAT-   |
|                                       | <i>Oceanibulbus indolifex HEL-45</i>    | 163745410                 | ----V-----TA---TEGQI         | M PE--N---K---RA--R-Y-E-MSM- |
| <i>Sulfitobacter sp. NAS-14.1</i>     | 83855284                                | ----V-----TA---L--D-I     | M PE--N---K--KPA--R-YEELLQV- |                              |
| <i>Rhodobacterales bacterium HTCC</i> | 126724759                               | ----V-----TA---IL--DNI    | M PE--N---K-S-KK-DL-F-Q-MNV- |                              |

Figure S39

Partial sequence alignment of a conserved region of Putative ribonuclease HIII showing a 1 aa insert that is present in all Xanthomonadales. The CSI has also been found to be shared by few species from  $\beta$ -Proteobacteria but is not present in all.
