# Supplementary material for: Phylogenomics and Molecular Signatures for Species from the Plant Pathogen-Containing Order Xanthomonadales
Source: PubMed Central journal article supplement (PMC3568101; doi:10.1371/journal.pone.0055216), 2013-02-08
Supplement: pone.0055216.s040.pdf [file pone.0055216.s040.pdf]

|                                  |                                     | 12                              | 58                                 |                                  |
|----------------------------------|-------------------------------------|---------------------------------|------------------------------------|----------------------------------|
| Xanthomonadales                  | <i>Xanthomonas axonopodis</i>       | 21244927                        | GTEELPVKALPGLAQALFDGVLGSGLEKRGIAVA | RG DAKPLSTPRRLA                  |
|                                  | <i>Xanthomonas fuscans</i>          | 294624286                       | -----R-F-----V--T                  | --                               |
|                                  | <i>Xanthomonas campestris</i>       | 78049866                        | -----E-F-----V--T                  | --                               |
|                                  | <i>Xanthomonas oryzae</i>           | 166714071                       | -----D--F-----T                    | -- A-----                        |
|                                  | <i>Xanthomonas albilineans</i>      | 285016900                       | -----IA--D-----E                   | --                               |
|                                  | <i>Stenotrophomonas sp. SKA14</i>   | 254522505                       | -----F----VD--R--V-LD              | L--R-----                        |
|                                  | <i>Stenotrophomonas maltophilia</i> | 190576418                       | -----F----VE--R--V-LE              | L--R-----                        |
|                                  | <i>Xylella fastidiosa</i>           | 15838553                        | -----N--N-SR-F-E--A-----V-D        | H-E-S-----                       |
|                                  | <i>Actinobacillus minor</i>         | 257465118                       | -----P--KK--T-FAEN-EAE-NQA-LSFD    | KVEWFAA----                      |
|                                  | <i>Aeromonas salmonicida</i>        | 145301092                       | --A--P--RS--E-FA-NFKAE-T-ADL-FG    | -IEWFAS----                      |
|                                  | <i>Aggregatibacter aphrophilus</i>  | 251793743                       | -----P--KT--TSFA-N-EAE-NQA-LTFD    | KIEWFAA----                      |
|                                  | <i>Alcanivorax borkumensis</i>      | 110832869                       | -----P--AS-SA--T-EFVRQ-DEA-LNHG    | AVERFAA----                      |
|                                  | <i>Azotobacter vinelandii</i>       | 226942180                       | -S----P--KS--T-FLA-IEK--AAA-LEYS   | V-RFYAA----                      |
|                                  | <i>Cardiobacterium hominis</i>      | 258545073                       | -V----T--VTT--D-GR-LWAQA-ANA-LTHG  | -IEA-A-----                      |
|                                  | Other<br>$\gamma$ -Proteobacteria   | <i>Cellvibrio japonicus</i>     | 192359481                          | -----P-N-KN-MN-FAESIQAD-TALELSFT |
| <i>Citrobacter koseri</i>        |                                     | 157149175                       | -----P--RS--ESFAAN-TAE-DNA-L-HG    | NVEWFAA----                      |
| <i>Colwellia psychrerythraea</i> |                                     | 71281166                        | -----P-S-KT--T-FY-NIKGQ-DSHNLSYS   | -I-WFA----F-                     |
| <i>Gronobacter turicensis</i>    |                                     | 260599858                       | -----P--RS--ESFAANFTAE-DAA-LTHG    | VVSWFAA----                      |
| <i>Dickeya dadantii</i>          |                                     | 242237521                       | -----P--RN--ESFAANFTAE-DTA-LGYG    | SVNWFAA----                      |
| <i>Haemophilus ictaluri</i>      |                                     | 238917996                       | -----P--RS--FA-NFRTE-DNA-L-HG      | -IEWFAA----                      |
| <i>Enhydrobacter aerosaccus</i>  |                                     | 257453498                       | -----P-N-KT-RD--NNH-TQS-KDAN-RFD   | TI-SFAA----                      |
| <i>Erwinia amylovora</i>         |                                     | 292490092                       | -----P--RS--ESFAANLTAE-DAA-L-HG    | EVSWFAA----                      |
| <i>Escherichia coli</i>          |                                     | 193068544                       | -----P--RS--EFFAANFTAE-DNA-L-HG    | TVQWFAA----                      |
| <i>Haemophilus influenzae</i>    |                                     | 145640588                       | -----P--KT--TSFA-N-EAE-TQA-LSFD    | KIEWFAA----                      |
| <i>Hahella chejuensis</i>        |                                     | 83642934                        | -A----P--RQ--E-FAQ-IRQR--AQLSFS    | ELTWYAA----                      |
| <i>Idiomarina baltica</i>        |                                     | 85711017                        | -----P--KQ-SESFKH-IEE--N-AEL-FG    | EI-A-A-----                      |
| <i>Klebsiella pneumoniae</i>     |                                     | 206579067                       | -----P--RS--ESFAAN-TAE-DNA-L-HG    | KVEWFAA----                      |
| <i>Mannheimia haemolytica</i>    |                                     | 254362729                       | -----P--KK--T-FAEN-ENE-NQA-LSFE    | KVEWFAA----                      |
| <i>Marinobacter sp. ELB17</i>    |                                     | 126668181                       | -----P--KQ-SD-FTQ-IV--QAA--EFG     | AVE-FAA----                      |
| <i>Nitrosococcus watsoni</i>     |                                     | 300115242                       | -----P--RK-SES-LQELGR--QAA-LIY-    | -L-GYGA----                      |
| <i>Oceanobacter sp. RED65</i>    |                                     | 94502179                        | -----PT--KS-RD-FQK-IETF-QAK-LSF-   | NSEAFAA----                      |
| <i>Pasteurella dagmatis</i>      |                                     | 260914511                       | -----P--KK--T-FAEN-ELE-NQA-LTFD    | KVEWFAA----                      |
| <i>Photobacterium profundum</i>  |                                     | 54307292                        | -----P--RT--E-FSSNFEE-KTAALVHQ     | GIEWFAA----                      |
| <i>Proteus mirabilis</i>         |                                     | 197286684                       | -----P--RS--ESFATHFTAE-DNAN-THG    | -VSWFAA----                      |
| <i>Providencia stuartii</i>      |                                     | 183597049                       | -----P--RS--ESFAANFTAE-DSAD--HG    | EVSWFAA----                      |
| <i>Pseudomonas aeruginosa</i>    |                                     | 296386480                       | -----P--NS-GE-FLS-IEK--KAA-LGY-    | A-RFYAA----                      |
| <i>Psychromonas ingrahamii</i>   |                                     | 119947319                       | -----P-S-RQ--ESFASN-EAE-N-AELSFD   | SVRW-AS----                      |
| <i>Salmonella enterica</i>       |                                     | 56415548                        | -----P--RS--ESFAANFTAE-DNA-L-HG    | NVEWFAA----                      |
| <i>Shigella boydii</i>           |                                     | 187731977                       | -----P--RS--ESFAANFTVE-DNA-L-HG    | TVQWFAA----T                     |
| <i>Tolunomas auensis</i>         | 237806784                           | -----P--RK--FA-NFTAE-D-A-L-HQ   | GVQWFAA----                        |                                  |
| <i>Vibrio furnissii</i>          | 260771056                           | -----P-Q-RT--E-FAANFTAE-NNA--HD | GVTWYA----                         |                                  |
| <i>Yersinia ruckeri</i>          | 238754024                           | -----P--RS--ESFAANITAE-DSANLSHG | -VSWFAA----                        |                                  |
| $\beta$ -Proteobacteria          | <i>Ralstonia eutropha H16</i>       | 113866550                       | F----P--AR-GD-FAQ-LFA--GE-DLLEP    | GA TVT-FA-----                   |
|                                  | <i>Cupriavidus necator N-1</i>      | 338164853                       | F----P--GR-GD-FAQ-LFA--GE-DLLEP    | GA TVT-FA-----                   |
|                                  | <i>Ralstonia eutropha JMP134</i>    | 73540213                        | F----P--AR-GD-FAQ-LFA--RE-DLLE-    | DA AVT-FAS-----                  |
| $\alpha$ -Proteobacteria         | <i>Bordetella pertussis</i>         | 33591304                        | F----P--QK-G--FAE--RAT-ARRHLLAD    | GC AVE-FA-----                   |
|                                  | <i>Starkeya novella</i>             | 298293954                       | FS--I-ARMQA-A-EN-RKL-TDA-VE--LLYE  | G--AFV-----                      |
|                                  | <i>Rhodobacterales bacterium</i>    | 254465195                       | FS--I-ARMQARA-ED-KKR-TD--VEA-LTY-  | G-AA-----T                       |
|                                  | <i>Oceanicola granulosus</i>        | 89070594                        | LS--I-ARMQAKASDD-KKM-TD--VEA-LTY-  | S-AAFA----V                      |
|                                  | <i>Roseovarius nubinhibens</i>      | 83952444                        | FS--I-ARMQAKA-ED-RQR-TD--VEA-LTY-  | G-ASF-----T                      |

Figure S40

Partial sequence alignment of a conserved region of glycyl-tRNA synthetase subunit beta showing a 2 aa insert that is present in all Xanthomonadales. The insert has also been found to be shared by species from  $\beta$ -Proteobacteria.
