# Supplementary material for: Phylogenomics and Molecular Signatures for Species from the Plant Pathogen-Containing Order Xanthomonadales
Source: PubMed Central journal article supplement (PMC3568101; doi:10.1371/journal.pone.0055216), 2013-02-08
Supplement: pone.0055216.s041.pdf [file pone.0055216.s041.pdf]

|                           |                              |                           |                             |                            |                        |
|---------------------------|------------------------------|---------------------------|-----------------------------|----------------------------|------------------------|
|                           | Stenotrophomonas maltophilia | 194364873                 | NPEVSSVRDSDRIIGLLDSKTHKAESG | QDVPAFLLLTRYTPRVESGEMLS    |                        |
|                           | Stenotrophomonas sp. SKA14   | 254522605                 | -----                       | -----                      |                        |
| Xanthomonadales           | Xanthomonas albilineans      | 285017689                 | -----L-----N-               | KSL-----S-A--G----         |                        |
|                           | Xanthomonas campestris       | 21230582                  | -----R--E-                  | KN-----S-G--G----          |                        |
|                           | Xanthomonas oryzae           | 84624994                  | -----R--E-                  | KA-----S-G--G----          |                        |
|                           | Xanthomonas axonopodis       | 21241979                  | -----R--E-                  | KA-----S-G--G----          |                        |
|                           | Xylella fastidiosa           | 15837922                  | -----K--T-                  | GSIIIT-----S-A-----        |                        |
|                           | Aeromonas hydrophila         | 117618772                 | -----L-I-A--SRR--R-         | E DPIKEH-----C-T--NR-D---  |                        |
|                           | Alcanivorax borkumensis      | 110833980                 | -----I-A--RH--Q-            | D G-I--R-----S-E--N-Q---   |                        |
|                           | Allochromatium vinosum       | 288940165                 | -----ML-I-S-RSKR--EN        | L DPIREY-----D-M--AN----   |                        |
|                           | Alteromonadales bacterium    | 119470940                 | -----L-I-H--SKR--E-         | L ENIKEH-----N-E--AK----   |                        |
|                           | Azotobacter vinelandii       | 226945563                 | -----ML--A--SRR--N-         | E EPIKEH-----S-D--NK----G  |                        |
|                           | Cardiobacterium hominis      | 258543901                 | -----L-I-A--S-R--L-         | E DP-KEH-VI---N-E--QQQ---- |                        |
|                           | Cellvibrio japonicus         | 192360095                 | -----L-I-Q--SRR--QS         | Q EPIREH-----N-S--A-----   |                        |
|                           | Citrobacter koseri           | 157145438                 | -----L-I-A--SRR--N-         | E DPIKEH-----N-G--NR-D---  |                        |
|                           | Colwellia psychrerythraea    | 71279322                  | -----L-M-A-RSRR--L-         | L EPIKEH-----S-K--E-----   |                        |
|                           | Dickeya dadantii             | 271500524                 | -----L-I-S--SRR--Q-         | Q DPIKEH-----N-G--SR-D---  |                        |
|                           | Enterobacter cancerogenus    | 261340186                 | -----L-I-A--SRR--N-         | Q EPIKEH-----N-G--SK-D---  |                        |
| Other<br>γ-Proteobacteria | Erwinia tasmaniensis         | 188533678                 | -----L-I-S--SRR--N-         | Q DAIKEH-----N-G--NR-D---  |                        |
|                           | Escherichia coli             | 191169112                 | -----L-I-A--SRR--N-         | E EPIKEH-----N-G--SR-D---  |                        |
|                           | Grimontia hollisae           | 262276191                 | -----L-I--SRR--N-           | E EP-KTH-----N-G--AR----   |                        |
|                           | Hahella chejuensis           | 83644579                  | -----L-I-H--SRR--M-         | L DP-KEH-----N-E--QN----   |                        |
|                           | Marinobacter algicola        | 149377096                 | -----L-I-Q--SRR--M-         | Q DP-KEH--S--N-D--K-----   |                        |
|                           | Nitrococcus mobilis          | 88813343                  | -----VL--A--RR--R-          | E PS-RER--V--A-S--GR-----  |                        |
|                           | Photobacterium profundum     | 90411625                  | -----L-I--SRR--QA           | E EP-KQH-----N-A--TN-D---  |                        |
|                           | Providencia alcalifaciens    | 212711899                 | -----L-I-S--SRR--K-         | Q DPIKEH-----N-G--TR-D---  |                        |
|                           | Pseudomonas aeruginosa       | 152987775                 | -----ML--A--SQR--K-         | E EAIKEH-----N-E--TK----G  |                        |
|                           | Salmonella enterica          | 16760705                  | -----L-I-A--SRR--N-         | E EPIKEH-----N-G--NK-D---  |                        |
|                           | Shewanella amazonensis       | 119775066                 | -----L-I-Q--SRR--QN         | L EPIKEY-----S-T--KN-----  |                        |
|                           | Vibrio cholerae              | 229529016                 | -----L-I--SMR--Q-           | Q APIKQH-----N-A--TQ----   |                        |
|                           | Yersinia intermedia          | 238794478                 | -----L-I-S--SRR--N-         | Q DPIKEH-----N-G--NR-D---  |                        |
|                           |                              | Kingella kingae           | 333375644                   | -----L-I-Q--SL--M-         | -S-KEH--I--S-E--K----- |
|                           |                              | Eikenella corrodens       | 225025768                   | -----L-I-Q--SRH--K-        | EQ-KEH--I--N-E-----    |
|                           |                              | Cupriavidus metallidurans | 94308979                    | -----L-I-S--KR-SE-         | EPIKEH--I--N-K--HG---- |
|                           |                              | Neisseria meningitidis    | 15676098                    | -----L-I-Q--S--Q-          | GS-KEH--I--S-E--AK---- |
|                           |                              | Comamonas testosteroni    | 221069679                   | -----L-M-S--ER-VK-         | ESIKEH--I--N-N--D-Q--- |
| β-Proteobacteria          | Delftia acidovorans          | 160895542                 | -----L-M-S--AR-IA-          | ES-KEH--I--N-N--QD-Q---    |                        |
|                           | Ralstonia eutropha           | 73539769                  | -----L-I-A--KR-SE-          | G EPIKEH--I--N-K--HG----   |                        |
|                           | Achromobacter xylosoxidans   | 338780958                 | -----L-I-AA-SKR-VE-         | G DP-KE-----N-K--VD----    |                        |
|                           | Acidovorax sp. JS42          | 121592501                 | -----L-M-S--KR-IE-          | G EP-KEH--I--N-H--D-Q---   |                        |
|                           | Pusillimonas sp. T7-7        | 332285270                 | -----L-I-SA-SRR--K-         | E EPIKEY-----N-K--AE----   |                        |
|                           | Acidovorax delafieldii       | 241764905                 | -----L-M-G--KR-IE-          | G EPIKEH--I--N-S--D-Q---   |                        |
|                           | Oxalobacteraceae bacterium   | 329901598                 | -----L-IIQA-SRR-QN-         | G EP-KEH--I--V-K-----      |                        |
|                           | Burkholderia graminis        | 170691957                 | -----L-I-S--KR-IE-          | K EPIKEH--I--N-K--SE----   |                        |
|                           | Ochrobactrum anthropi        | 153010294                 | -----A--L--R-               | ER-EKH-----D--A-R-D--K     |                        |
|                           | Methylocella silvestris      | 217976820                 | -----E--K-                  | ERMEKH-----DAA-A-R--K      |                        |
| α-Proteobacteria          | Gluconobacter oxydans        | 58038876                  | -----Q--Q-                  | EK-EKH-----D-A-AARK----    |                        |
|                           | Brucella neotomae            | 256059452                 | -----L--R-                  | EKMDKH-----D-S-A-R-D--K    |                        |
|                           | Methylobacterium nodulans    | 220922834                 | -----A--AR--A-              | -SLDKH-I--D-A-A-R--K       |                        |
|                           | Sinorhizobium medicae        | 150376483                 | -----A--ER--R-              | ER-EKH-----DA--A-R-D--K    |                        |
|                           | Aurantimonas manganooxydans  | 90419084                  | -----A--A--R-               | ERMEKH-----D-N-A-R-D--K    |                        |

Figure S41

Partial sequence alignment of a conserved region of the Septum-site determining protein MinD showing a 1 aa deletion that is present in all Xanthomonadales. This CSI is present in some species from β-Proteobacteria.
