# Supplementary material for: Phylogenomics and Molecular Signatures for Species from the Plant Pathogen-Containing Order Xanthomonadales
Source: PubMed Central journal article supplement (PMC3568101; doi:10.1371/journal.pone.0055216), 2013-02-08
Supplement: pone.0055216.s042.pdf [file pone.0055216.s042.pdf]

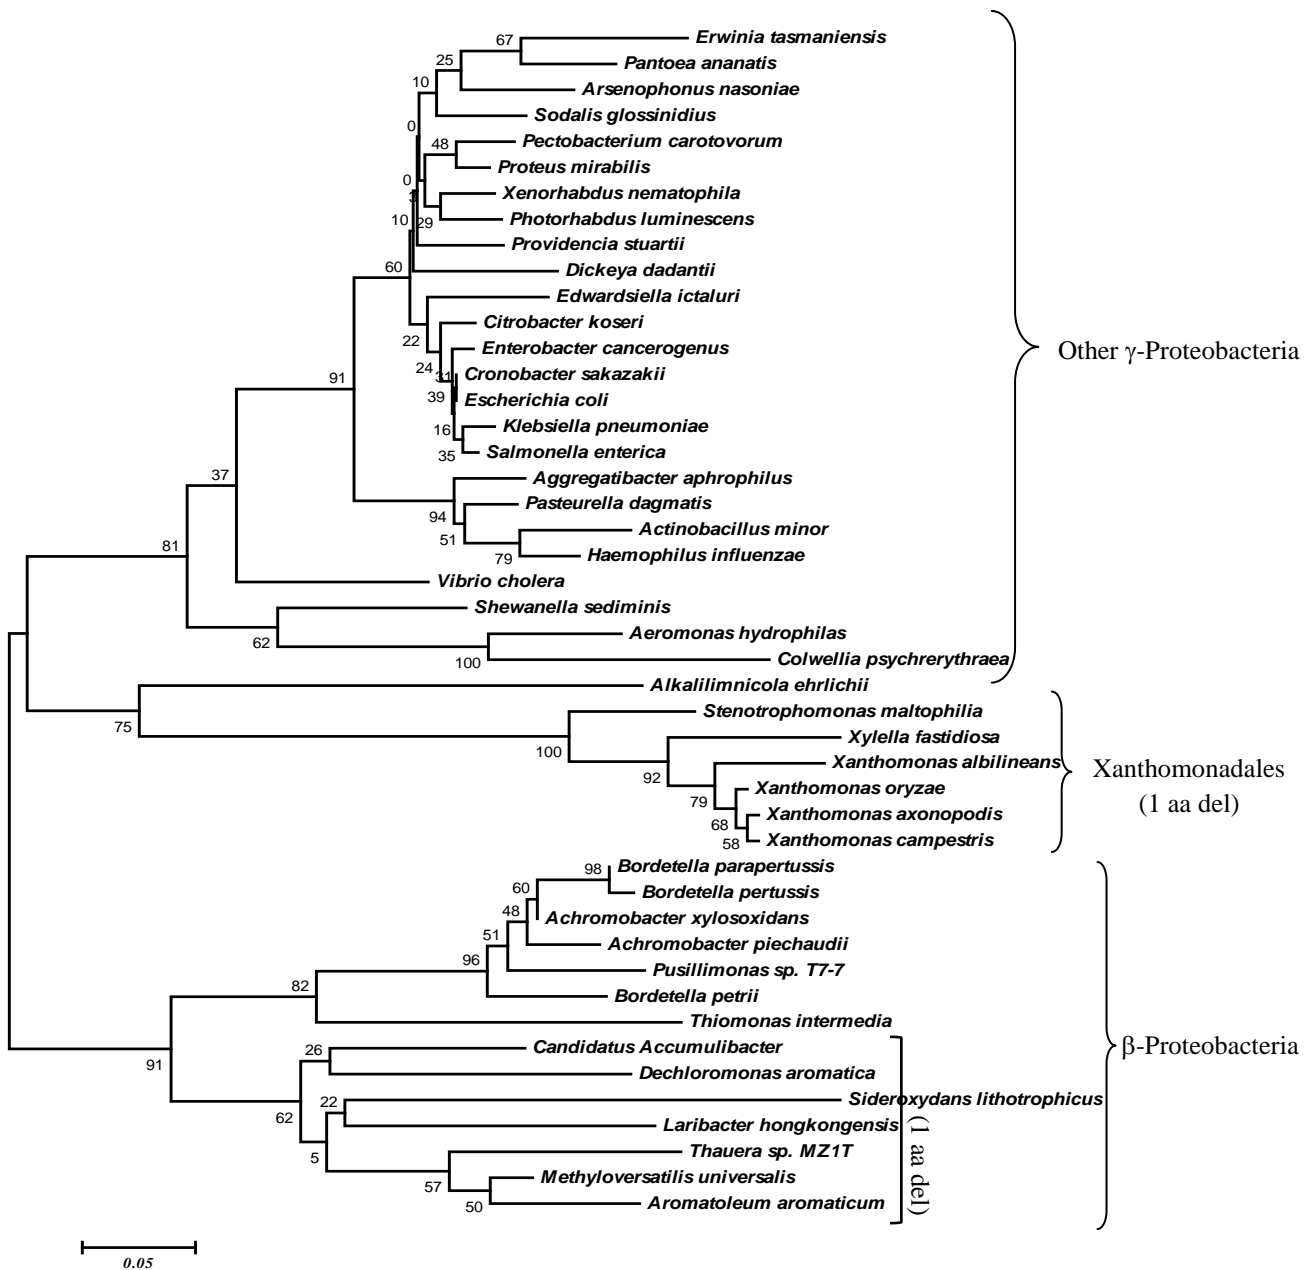

**Figure S42**

A Neighbor-joining (NJ) tree based upon sequences from hypothetical protein X001065. The numbers on the nodes indicate the bootstrap values. The Tree is showing the Xanthomonadales and various  $\beta$ -Proteobacteria that share the 1 aa deletion. Species representing some other Gammaproteobacteria are also shown in tree.
