# Supplementary material for: Phylogenomics and Molecular Signatures for Species from the Plant Pathogen-Containing Order Xanthomonadales
Source: PubMed Central journal article supplement (PMC3568101; doi:10.1371/journal.pone.0055216), 2013-02-08
Supplement: pone.0055216.s044.pdf [file pone.0055216.s044.pdf]

0.05

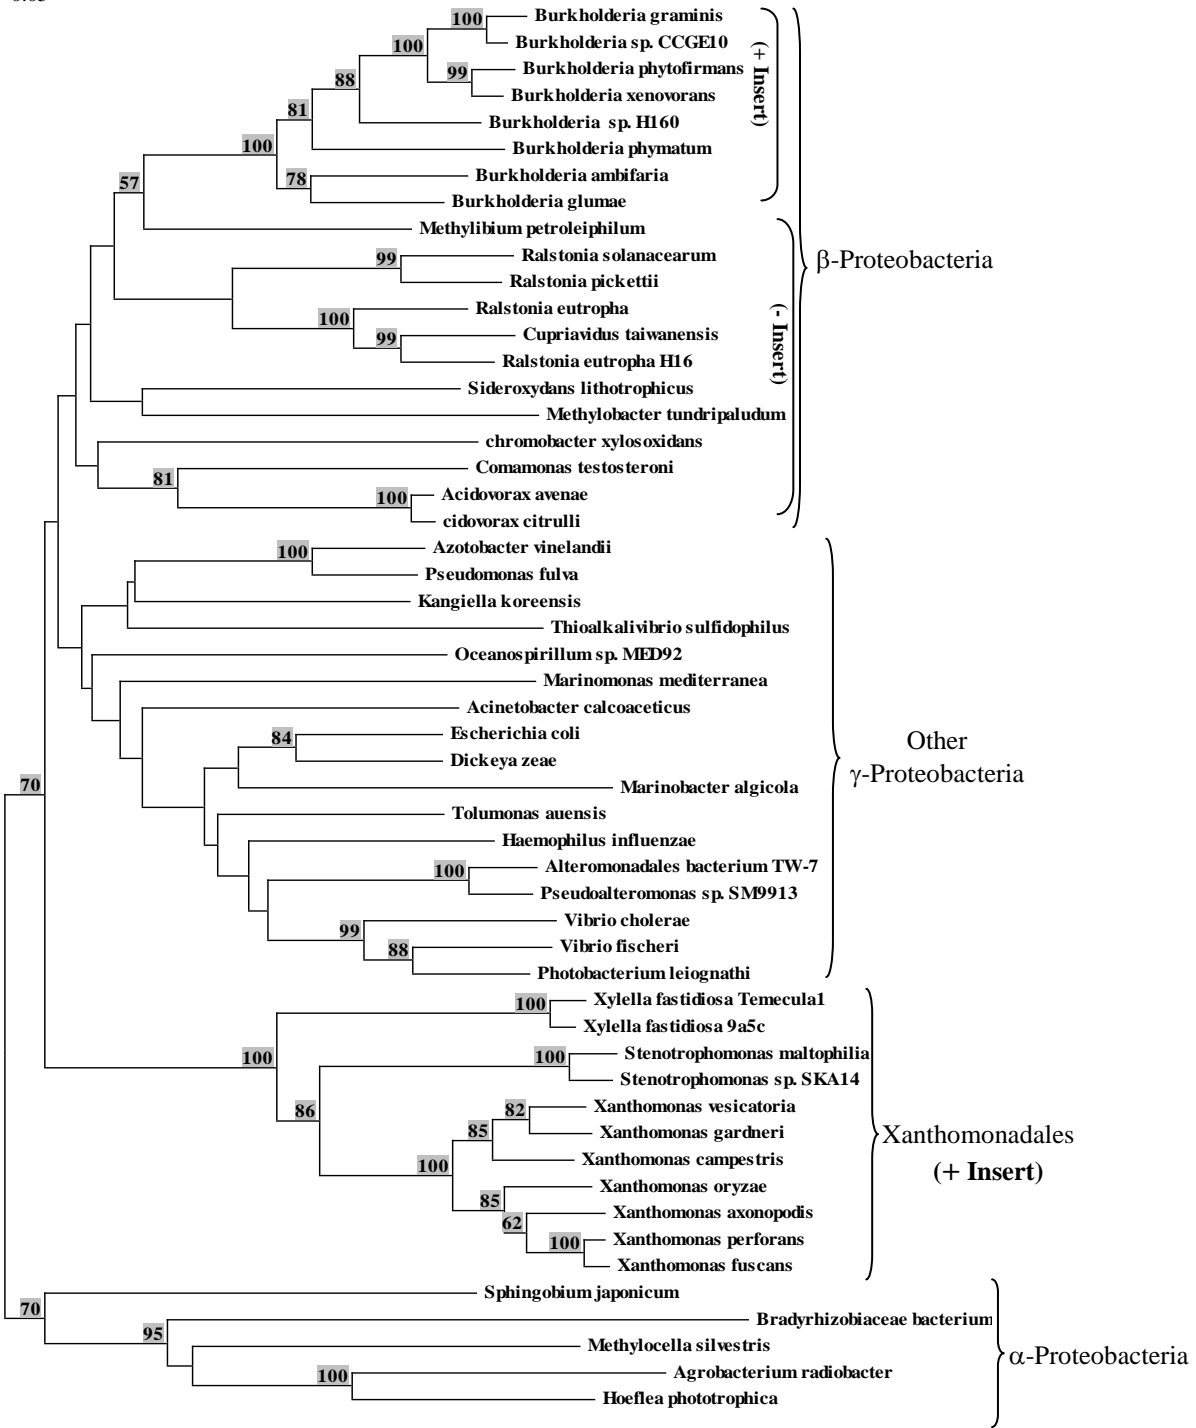

Figure S44

A Neighbor-joining (NJ) tree based upon sequences from putative ribonuclease HIII. The numbers on the nodes indicate the bootstrap values. The Tree is showing the Xanthomonadales and various β-Proteobacteria with insert. The tree also shows representative species from other Gammaproteobacteria and Alphaproteobacteria.
