# Supplementary material for: Phylogenomics and Molecular Signatures for Species from the Plant Pathogen-Containing Order Xanthomonadales
Source: PubMed Central journal article supplement (PMC3568101; doi:10.1371/journal.pone.0055216), 2013-02-08
Supplement: pone.0055216.s045.pdf [file pone.0055216.s045.pdf]

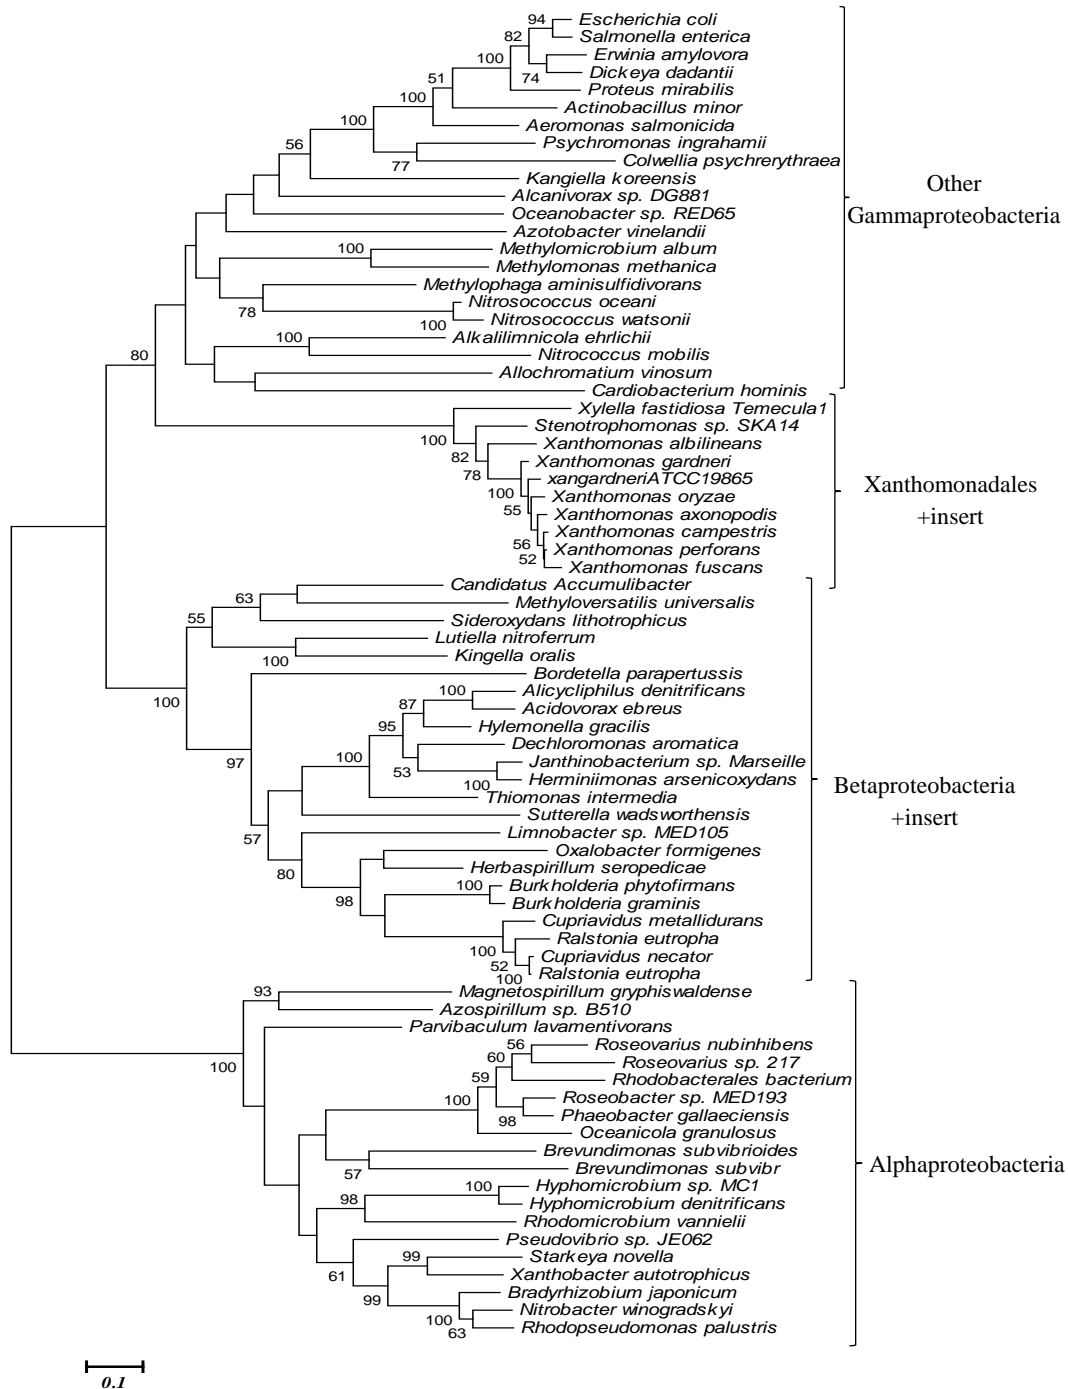

**Figure S45**

A maximum-likelihood (ML) tree based upon sequences from glycyI-tRNA synthetase subunit beta subunit. The numbers on the nodes indicate the bootstrap values. The Tree shows the branching of Xanthomonadales separately from the other insert containing Betaproteobacteria. The species distribution of this insert could be explained by either the independent occurrence of a similar genetic event in the Betaproteobacteria and the Xanthomonadales, or that this insert was introduced in a common ancestor of the Beta- and Gamma-proteobacteria, followed by its loss from other Gammaproteobacteria after the divergence of deep-branching Xanthomonadales.
