# Supplementary material for: Phylogenomics and Molecular Signatures for Species from the Plant Pathogen-Containing Order Xanthomonadales
Source: PubMed Central journal article supplement (PMC3568101; doi:10.1371/journal.pone.0055216), 2013-02-08
Supplement: pone.0055216.s046.pdf [file pone.0055216.s046.pdf]

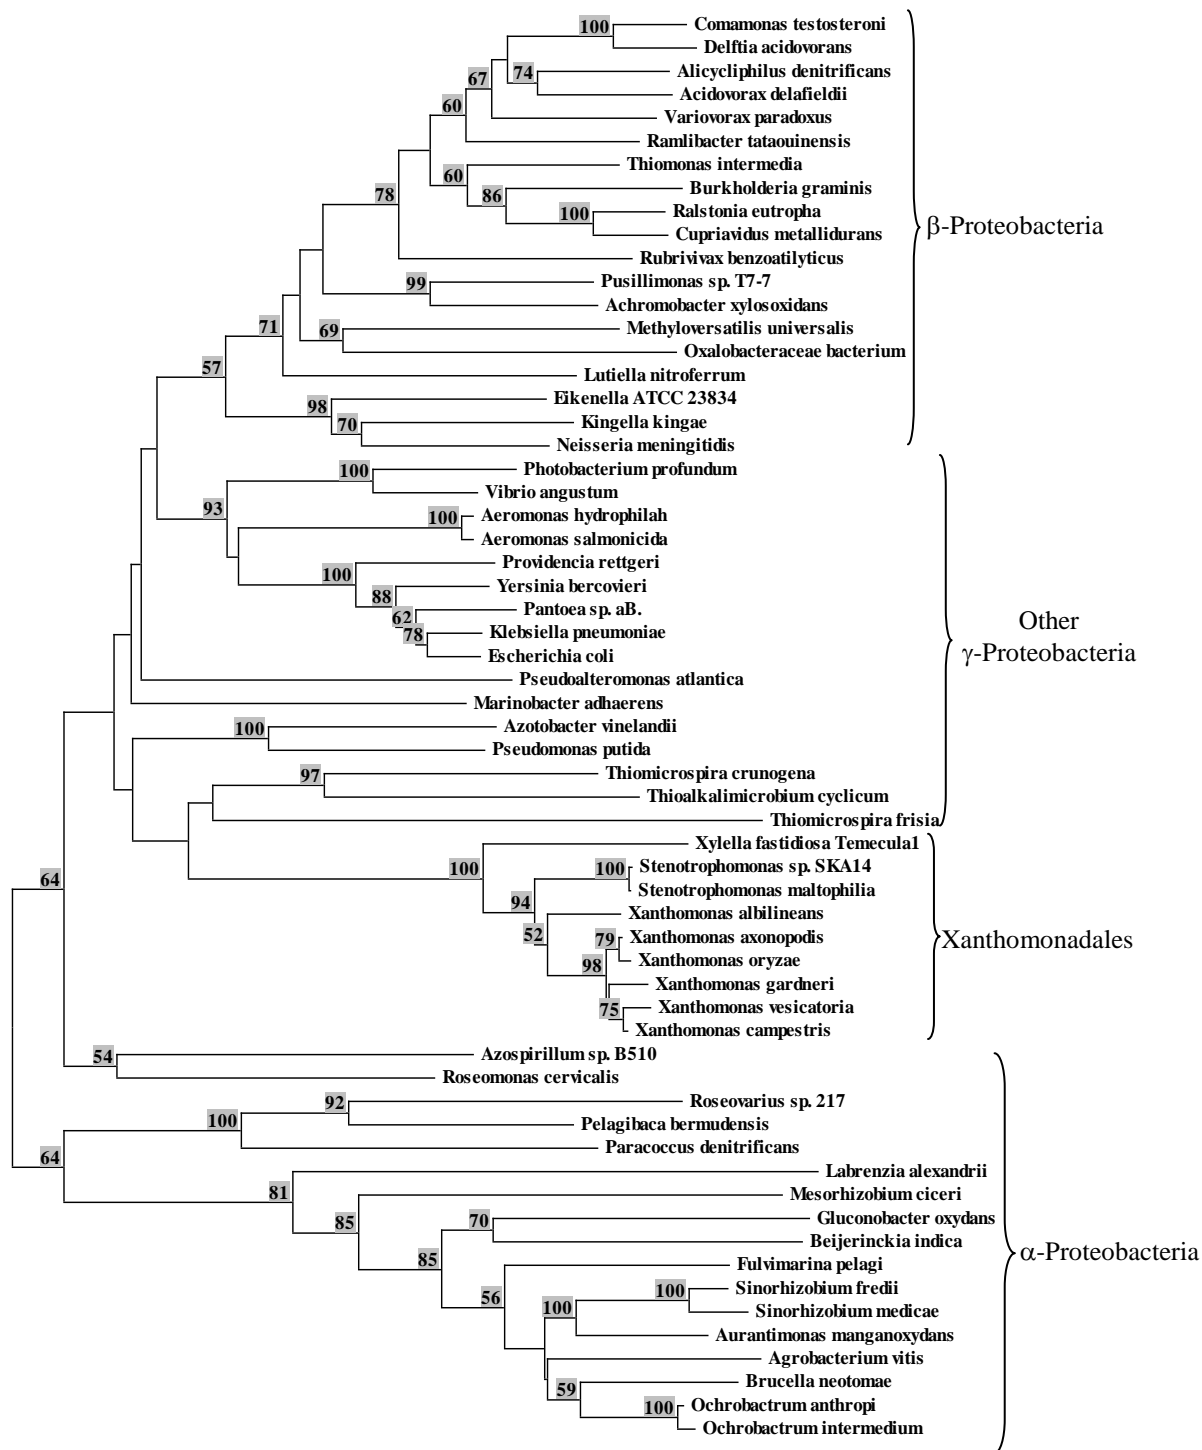

**Figure S46**

A Neighbor-joining (NJ) tree based upon sequences from septum site-determining protein MinD protein. The numbers on the nodes indicate the bootstrap values. The Tree is showing the branching of Xanthomonadales distinctly from the other insert containing betaproteobacteria.
